# Supplementary material
Source: Royal Society of Chemistry journal article supplement (doi:10.1039/d6ob00721j)

# Supporting Information

## Copper-Catalyzed Selective 1,2-Disulfidation of 1,3-Dienes

Shuilin Liu,<sup>a</sup> Pu Chen,<sup>\*,a</sup> Liu, Ning<sup>\*,a</sup>, Huawen Huang<sup>\*,b,c</sup>

<sup>a</sup> College of Chemistry and Environmental Engineering, Hunan Institute of Technology,  
Hengyang, Hunan, 421200, China.

<sup>b</sup> College of Chemistry, Xiangtan University, Xiangtan, Hunan, 411100, China.

<sup>c</sup> School of Chemistry and Chemical Engineering, Henan Normal University, Xinxiang,  
Henan 453007, China.

E-mail: 13873019351@163.com; hwhuang@xtu.edu.cn.

|                                                                                             |           |
|---------------------------------------------------------------------------------------------|-----------|
| <b>Supporting Information</b> .....                                                         | <b>1</b>  |
| <b>1. General information</b> .....                                                         | <b>1</b>  |
| <b>2. General Procedure for the Synthesis of 1,3-dienes (1)<sup>1-5</sup></b> .....         | <b>2</b>  |
| <b>3. General procedures for the synthesis of 4.</b> .....                                  | <b>3</b>  |
| <b>4. Optimization of the reaction conditions for the synthesis of 4a<sup>a</sup></b> ..... | <b>3</b>  |
| <b>5. Mechanistic Investigations</b> .....                                                  | <b>4</b>  |
| <b>5.1 Free radical capture experiments</b> .....                                           | <b>4</b>  |
| <b>5.2 Step-by-step reaction</b> .....                                                      | <b>5</b>  |
| <b>5.3 Other olefinic substrates</b> .....                                                  | <b>7</b>  |
| <b>5.4 Failed substrates</b> .....                                                          | <b>10</b> |
| <b>6. Characterization data of products</b> .....                                           | <b>12</b> |
| <b>7. References</b> .....                                                                  | <b>31</b> |
| <b>8. NMR Spectra</b> .....                                                                 | <b>32</b> |

## 1. General information

Reactions via general procedure were carried out under an air atmosphere unless otherwise noted. Column chromatography was performed using silica gel (200-300 mesh).  $^1\text{H}$  NMR,  $^{13}\text{C}$  NMR and  $^{31}\text{P}$  NMR spectra were recorded on Bruker-AV (400, 100, 162 MHz, respectively) instrument using  $\text{CDCl}_3$  or Dimethyl Sulfoxide- $d_6$  as solvent, Chemical shifts are given in ppm and coupling constants in 400Hz. Chemical shift values are reported in  $\delta$  (ppm) relative to  $\text{CDCl}_3$  ( $^1\text{H}$  NMR,  $\delta = 7.26$ ;  $^{13}\text{C}$  NMR,  $\delta = 77.00$ ), respectively. In order to indicate the signal multiplicity, the following abbreviations were used: s (singlet), d (doublet), t (triplet), q (quartet) and m (multiplet) as well as combinations of them. Mass spectra were measured on Agilent 5975 GC-MS instrument (EI). High-resolution mass spectra (ESI) were obtained with the Thermo Scientific LTQ Orbitrap XL mass spectrometer. Melting points were measured with a YUHUA X-5 melting point instrument and were uncorrected.

## 2. General Procedure for the Synthesis of 1,3-dienes (1)<sup>1-5</sup>

Method A :

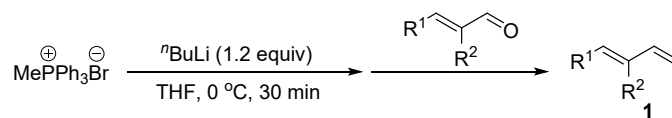

<sup>n</sup>BuLi (6 mmol, 2.5 M in hexane) was added dropwise to a stirred suspension of MePPh<sub>3</sub>Br (6 mmol, 1.2 equiv.) in anhydrous THF (30 mL) at 0 °C under a nitrogen atmosphere. The mixture was stirred for 30 min. Then cinnamaldehydes (5 mmol, 1.0 equiv.) was added, and the reaction was kept stirring for 4-8 h with TLC detection. After the complete consumption of cinnamaldehyde, the mixture was poured into saturated aq. NH<sub>4</sub>Cl and extracted with EtOAc (30 mL × 3). The combined organic extracts were dried over anhydrous Na<sub>2</sub>SO<sub>4</sub>, and then concentrated. The product was purified by column chromatography on silica gel to afford desired 1,3-dienes.

Method B:

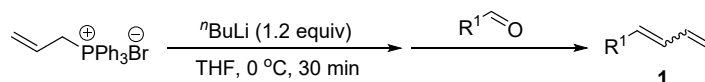

nBuLi (6 mmol, 2.5 M in hexane) was added dropwise to a stirred suspension of allylPPh<sub>3</sub>Br (6 mmol, 1.2 equiv.) in anhydrous THF (30 mL) at 0 °C under a nitrogen atmosphere. The mixture was stirred for 30 min. Then the aldehyde (5 mmol, 1.0 equiv.) was added, and the reaction was kept stirring for 4-8 h with TLC detection. After the complete consumption of cinnamaldehyde, the mixture was poured into saturated aq. NH<sub>4</sub>Cl and extracted with EtOAc (30 mL × 3). The combined organic extracts were dried over anhydrous Na<sub>2</sub>SO<sub>4</sub>, and then concentrated. The product was purified by column chromatography on silica gel to afford desired 1,3-dienes.

### 3. General procedures for the synthesis of 4.

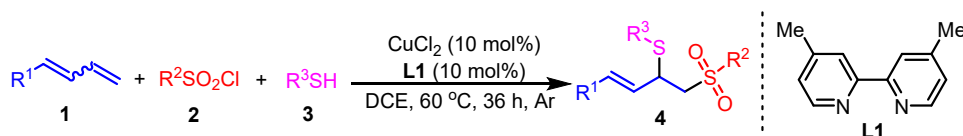

**Standard conditions:** A 10 mL reaction vessel was charged with 1,3-butadienes **1** (0.2 mmol), sulfonyl chlorides **2** (1.5 equiv, 0.3 mmol), mercaptans or thiophenols **3** (1.5 equiv, 0.3 mmol), CuCl<sub>2</sub> (10 mol %), **L1** (10 mol %) and DCM (2 mL) at 60 °C for 36 h under an argon atmosphere. Until complete consumption of the starting material was observed by TLC and/or GC-MS analysis. The extracts were combined, dried over sodium sulfate, filtered and the volatiles were removed under reduced pressure. The reaction yield was quantified by separation, and then column chromatography was performed using silica gel (200-300 mesh) or thin layer chromatography was performed using silica gel (GF254) to give product **4** (petroleum ether/ethyl acetate, 15 : 1 to 9 : 1). **Gram-scale experiment:** A 100 mL reaction vessel was charged with 1-phenylbutadiene **1a** (0.65 g, 5 mmol), 4-methylbenzenesulfonyl chloride **2a** (1.5 equiv, 7.5 mmol, 1.42 g), cyclopentanethiol **3a** (1.5 equiv, 7.5 mmol, 0.76 g), CuCl<sub>2</sub> (10 mol %, 67.2 mg), **L1** (10 mol %, 93.1 mg) and DCM (50 mL) at 60 °C for 60 h under an argon atmosphere gave the target product **4a** in 50% (0.97 g) yield.

### 4. Optimization of the reaction conditions for the synthesis of 4a<sup>a</sup>

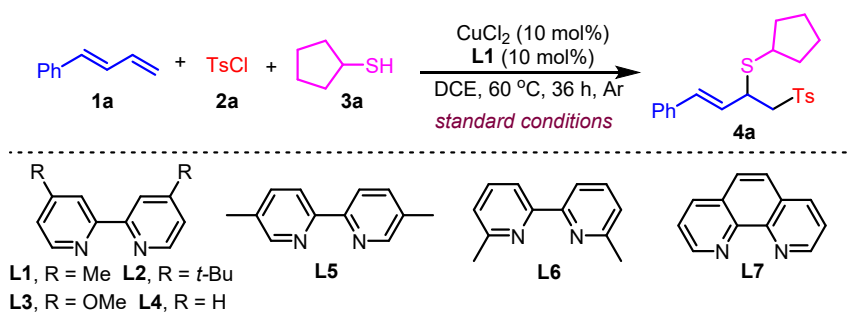

| Entry | Catalyst | Ligand    | Solvent | T/°C  | Yield (%) <sup>b</sup> |
|-------|----------|-----------|---------|-------|------------------------|
| 1     | CuCl     | <b>L1</b> | DCM     | 60 °C | 62                     |
| 2     | CuO      | <b>L1</b> | DCM     | 60 °C | 32                     |

|                 |                                                     |           |                    |              |           |
|-----------------|-----------------------------------------------------|-----------|--------------------|--------------|-----------|
| 3               | CuCN                                                | L1        | DCM                | 60 °C        | trace     |
| 4               | CuBr                                                | L1        | DCM                | 60 °C        | 17        |
| 5               | Cu(CH <sub>3</sub> CN) <sub>4</sub> PF <sub>6</sub> | L1        | DCM                | 60 °C        | 27        |
|                 | 6                                                   |           |                    |              |           |
| 6               | <b>CuCl<sub>2</sub></b>                             | <b>L1</b> | <b>DCM</b>         | <b>60 °C</b> | <b>68</b> |
| 7               | Cu(OTf) <sub>2</sub>                                | L1        | DCM                | 60 °C        | 35        |
| 8               | Cu(OAc) <sub>2</sub> ·H <sub>2</sub> O              | L1        | DCM                | 60 °C        | 40        |
| 9               | Cu <sub>2</sub> O                                   | L1        | DCM                | 60 °C        | 18        |
| 10              | CuCl <sub>2</sub>                                   | L2        | DCM                | 60 °C        | 59        |
| 11              | CuCl <sub>2</sub>                                   | L3        | DCM                | 60 °C        | trace     |
| 12              | CuCl <sub>2</sub>                                   | L4        | DCM                | 60 °C        | trace     |
| 13              | CuCl <sub>2</sub>                                   | L5        | DCM                | 60 °C        | 27        |
| 14              | CuCl <sub>2</sub>                                   | L6        | DCM                | 60 °C        | 48        |
| 15              | CuCl <sub>2</sub>                                   | L7        | DCM                | 60 °C        | 10        |
| 16              | CuCl <sub>2</sub>                                   | L1        | DCE                | 60 °C        | 60        |
| 17              | CuCl <sub>2</sub>                                   | L1        | CHCl <sub>3</sub>  | 60 °C        | 52        |
| 18              | CuCl <sub>2</sub>                                   | L1        | THF                | 60 °C        | trace     |
| 19              | CuCl <sub>2</sub>                                   | L1        | toluene            | 60 °C        | ND        |
| 20              | CuCl <sub>2</sub>                                   | L1        | DMF                | 60 °C        | ND        |
| 21              | CuCl <sub>2</sub>                                   | L1        | NMP                | 60 °C        | 21        |
| 22              | CuCl <sub>2</sub>                                   | L1        | 1,4-dioxane        | 60 °C        | trace     |
| 23              | CuCl <sub>2</sub>                                   | L1        | EA                 | 60 °C        | ND        |
| 24              | CuCl <sub>2</sub>                                   | L1        | acetone            | 60 °C        | 12        |
| 25              | CuCl <sub>2</sub>                                   | L1        | CH <sub>3</sub> CN | 60 °C        | ND        |
| 26 <sup>c</sup> | CuCl <sub>2</sub>                                   | L1        | DCM                | 60 °C        | 38        |
| 27 <sup>d</sup> | CuCl <sub>2</sub>                                   | L1        | DCM                | 60 °C        | trace     |
| 28              | CuCl <sub>2</sub>                                   | L1        | DCM                | 40 °C        | 35        |
| 29              | CuCl <sub>2</sub>                                   | L1        | DCM                | 80 °C        | 52        |
| 30              | ---                                                 | L1        | DCM                | 60 °C        | ND        |
| 31              | CuCl <sub>2</sub>                                   | ---       | DCM                | 60 °C        | ND        |
| 32 <sup>e</sup> | CuCl <sub>2</sub>                                   | L1        | DCM                | 60 °C        | 47        |
| 33 <sup>f</sup> | CuCl <sub>2</sub>                                   | L1        | DCM                | 60 °C        | 18        |

<sup>a</sup> Reaction conditions: **1a** (0.2 mmol), **2a** (1.5 equiv), **3a** (1.5 equiv), CuCl<sub>2</sub> (10 mol%), **L1** (10 mol %), DCM (2 mL) at 60 °C (oil bath) for 48 h under an argon atmosphere. <sup>b</sup> Isolated yield, ND (not detected) and trace were determined by TLC analysis. <sup>c</sup> 2.0 equiv K<sub>2</sub>CO<sub>3</sub>. <sup>d</sup> 2.0 equiv Et<sub>3</sub>N. <sup>e</sup> 24 h. <sup>f</sup> at air.

## 5. Mechanistic Investigations

### 5.1 Free radical capture experiments

The following reaction was carried out under standard condition: A 10 mL

reaction vessel was charged with 1-phenylbutadiene **1a** (0.2 mmol), 4-methylbenzenesulfonyl chloride **2a** (1.5 equiv, 0.3 mmol), cyclopentanethiol **3a** (1.5 equiv, 0.3 mmol), CuCl<sub>2</sub> (10 mol %), **L1** (10 mol %), 2,2,6,6-tetramethyl-1-piperidinyloxy (TEMPO) (3.0 equiv) or 1,1-Diphenylethylene (3.0 equiv) or 2,6-di-*tert*-butyl-4-methylphenol (BHT) and DCE (2 mL) at 60 °C for 24 h under an argon atmosphere. After completion, the consequence was detected by TLC and/or GC-MS analysis.

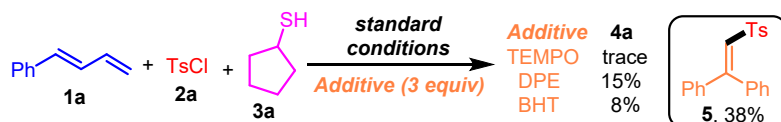

HRMS detection of BHT-trapped sulfonyl radical:

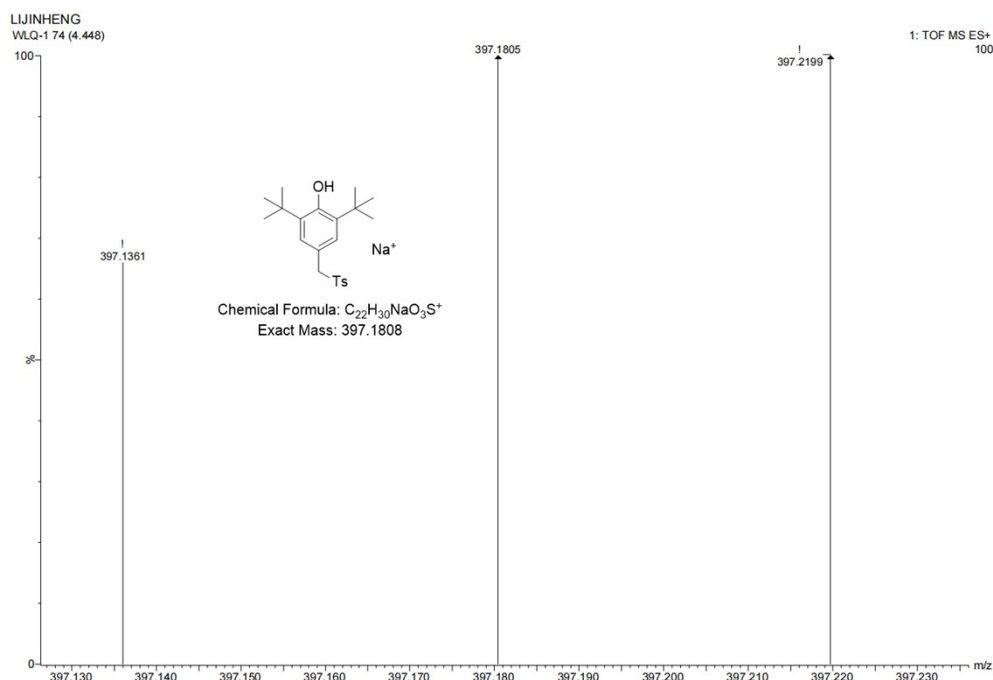

## 5.2 Step-by-step reaction

**Setp 1:** a 10 mL reaction vessel was charged with 2-bromo-1-(buta-1,3-dien-1-yl)-4-fluorobenzene **1n** (0.2 mmol), 4-methylbenzenesulfonyl chloride **2a** (1.5 equiv, 0.3 mmol), CuCl<sub>2</sub> (10 mol %, 0.002 mmol), **L1** (10 mol %, 0.002 mmol) and DCM (2 mL) at 60 °C for 24 h under an argon atmosphere. After completion, column chromatography was performed using silica gel (200-300 mesh) to give intermediate product **9** in 45% yield (petroleum ether/ethyl acetate, 12 :1) and NMR was performed.

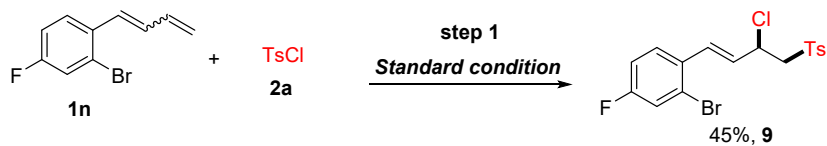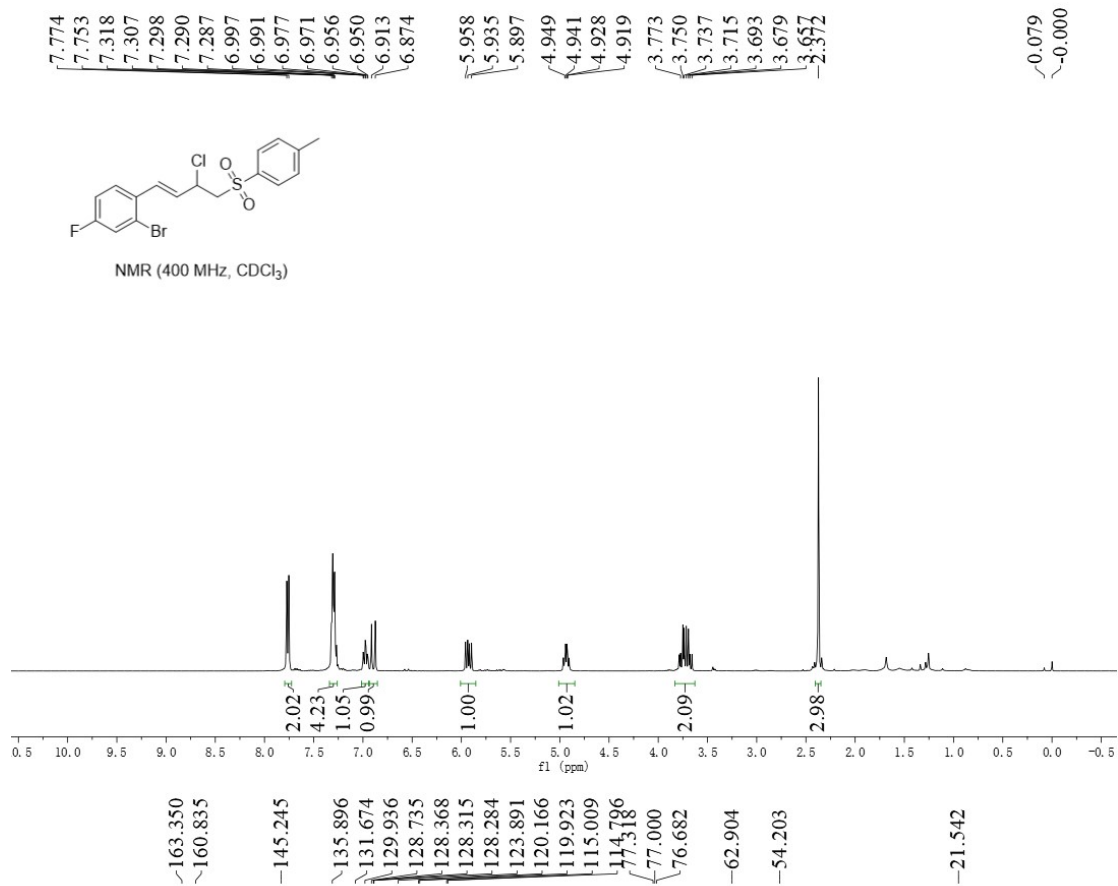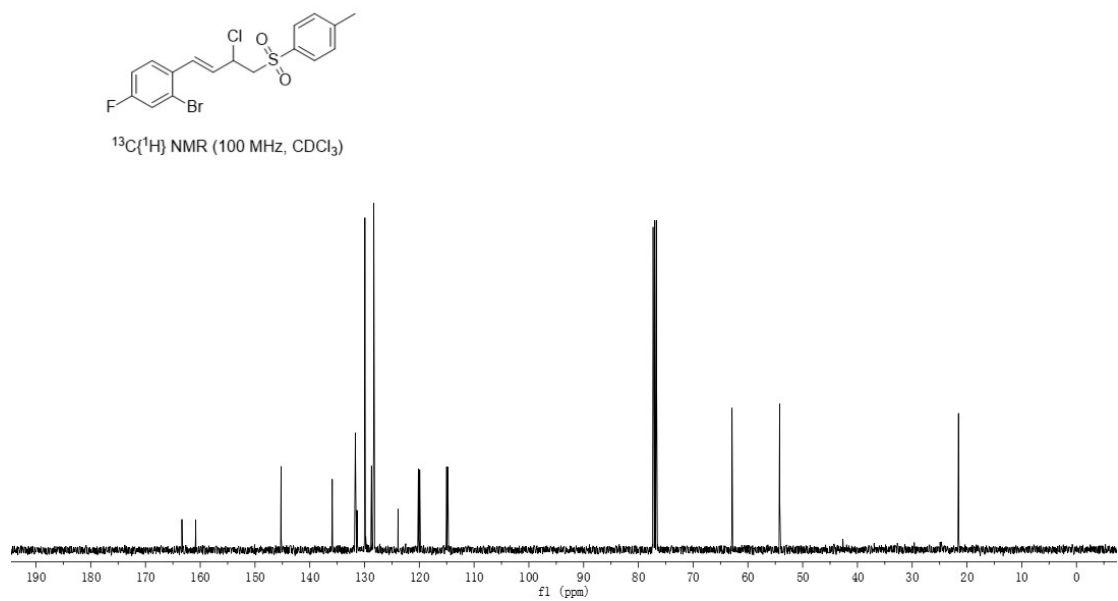

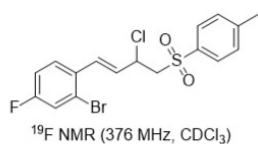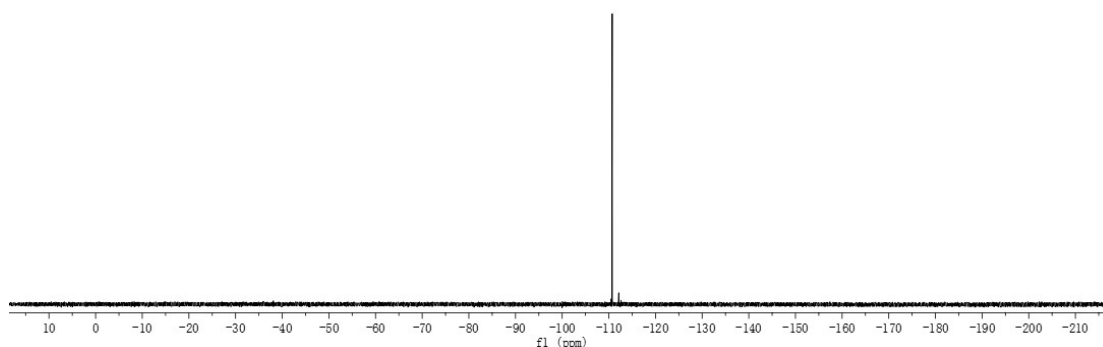

**Setp 2:** Subsequently, the above obtained intermediate product **9** (0.2 mmol), cyclopentyl mercaptan **3a** (1.5 equiv, 0.3 mmol) in DCM (2 mL) at 60 °C with stirring for a further 12 h, only trace amounts of product **4n** is produced. Then, CuCl<sub>2</sub> (10 mol%) and **L1** (10 mol%) were added to react with argon atmosphere at 60 °C for 12 h. Likewise, only trace amounts of product **4n** is produced.

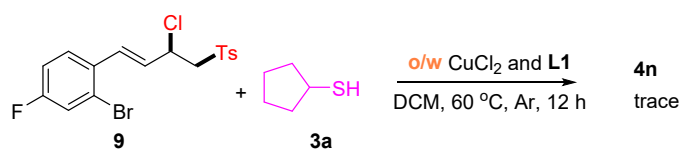

### 5.3 Other olefinic substrates

The following reaction was carried out under standard condition: A 10 mL reaction vessel was charged with alkenes (0.2 mmol), 4-methylbenzenesulfonyl chloride **2a** (1.5 equiv, 0.3 mmol), cyclopentanethiol **3a** (1.5 equiv, 0.3 mmol), CuCl<sub>2</sub> (10 mol %), **L1** (10 mol %), and DCM (2 mL) at 60 °C for 36 h under an argon atmosphere. After completion, the consequence was detected by TLC and/or GC-MS analysis. Then, separated by column chromatography was performed using silica gel (200-300 mesh).

Reaction with styrene **10** : column chromatography was performed using silica gel (200-300 mesh) to give 1,2-sulfone chlorinated products **11'** in 88% yield

(petroleum ether/ethyl acetate, 15 :1) and NMR was performed.

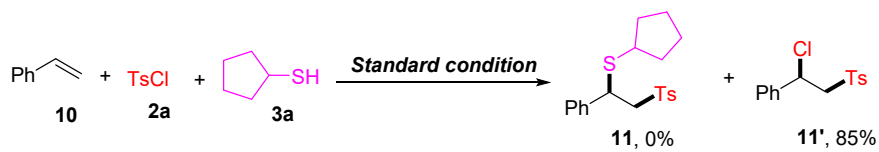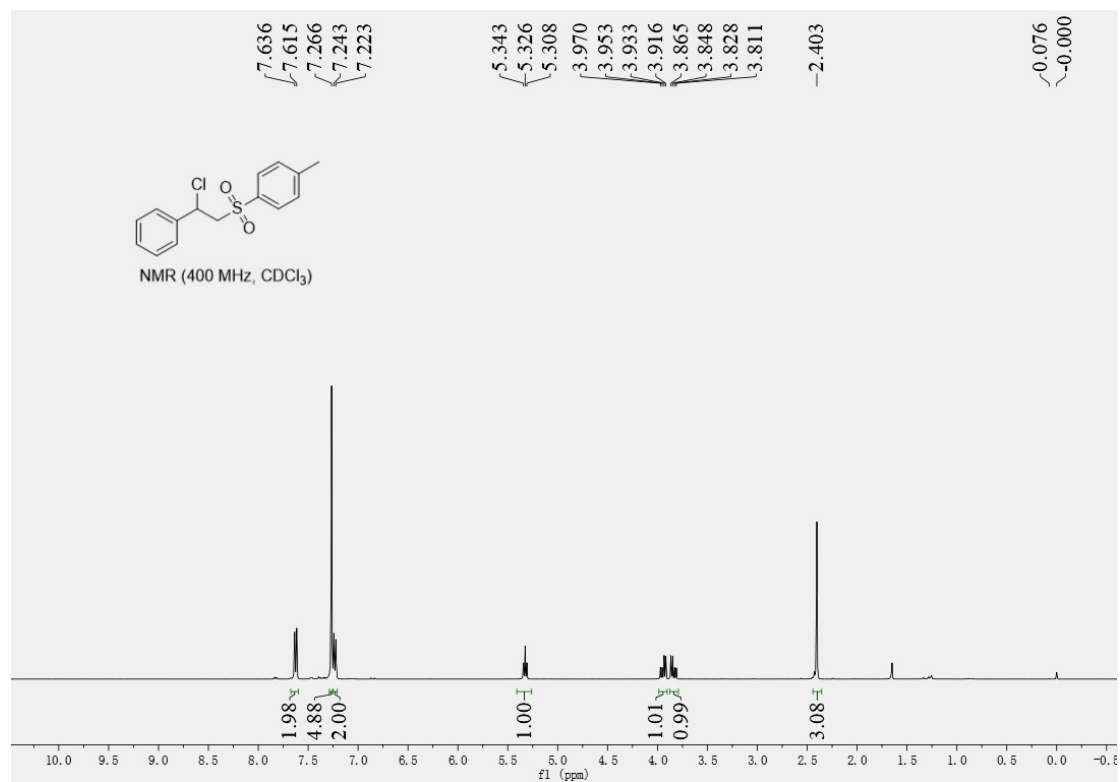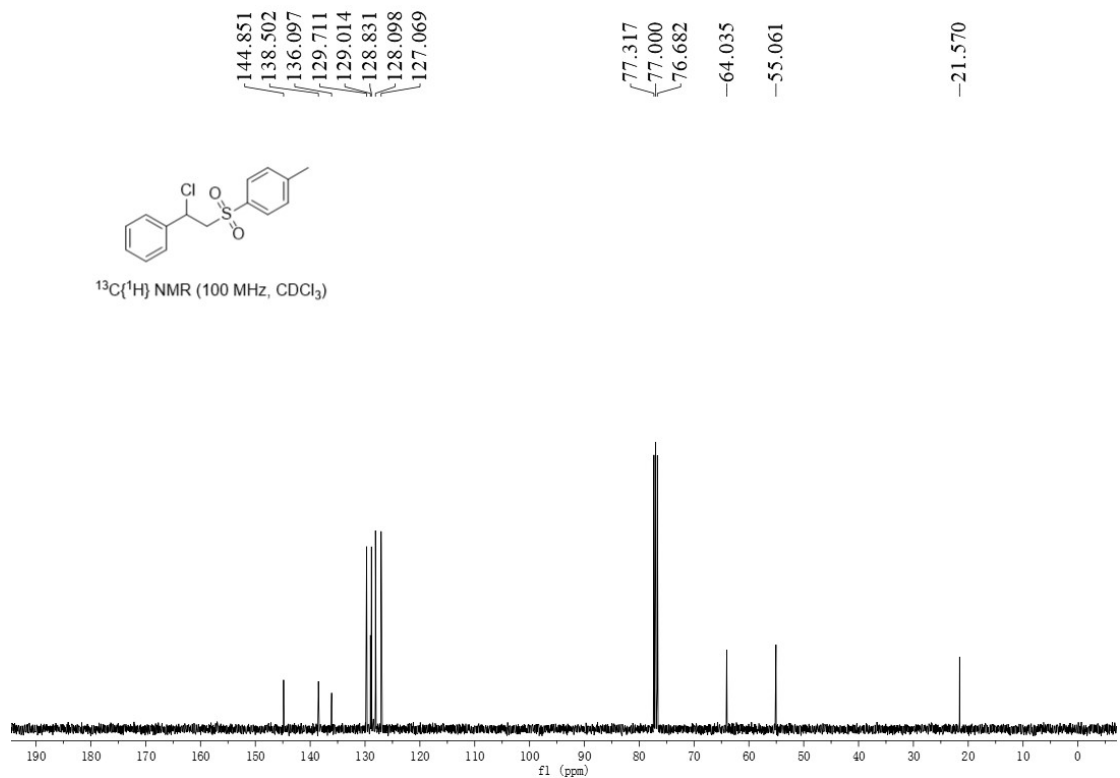

Reaction with 2-vinylnaphthalene **12** : column chromatography was performed using silica gel (200-300 mesh) to give 1,2-sulfone chlorinated products **13'** 63% yield, separately (petroleum ether/ethyl acetate, 12 :1) and NMR was performed.

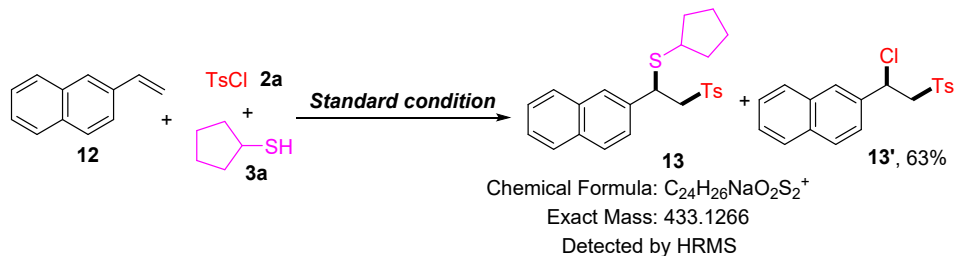

HRMS of product 13:

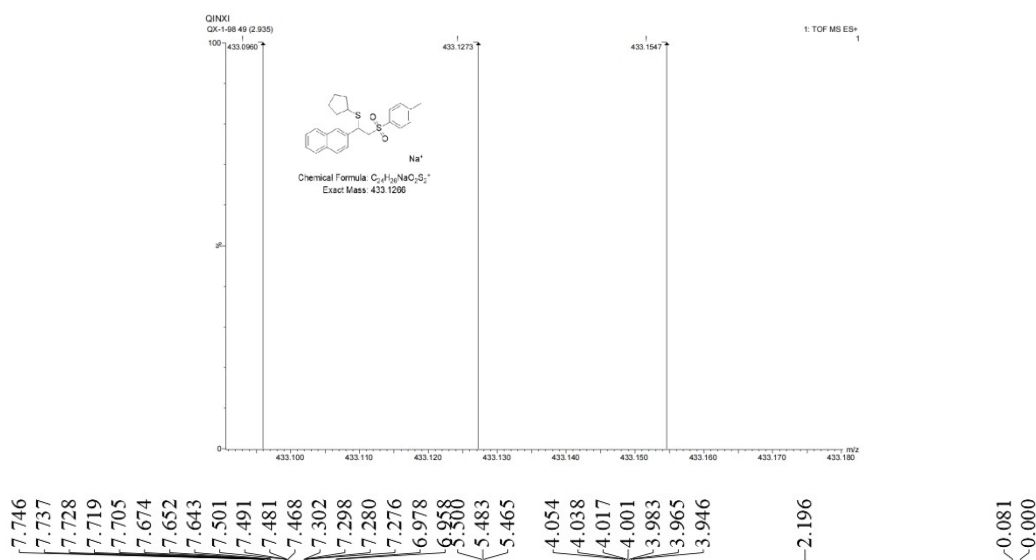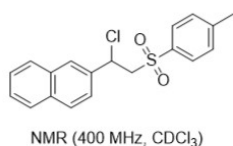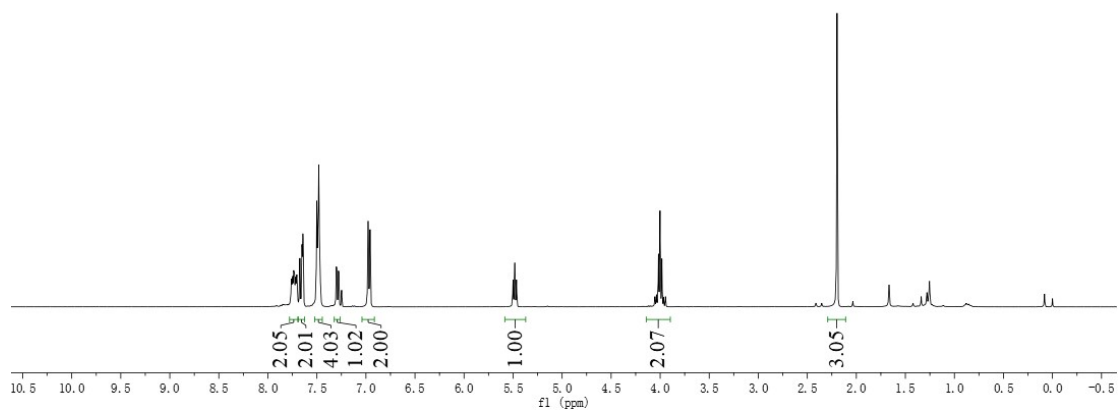

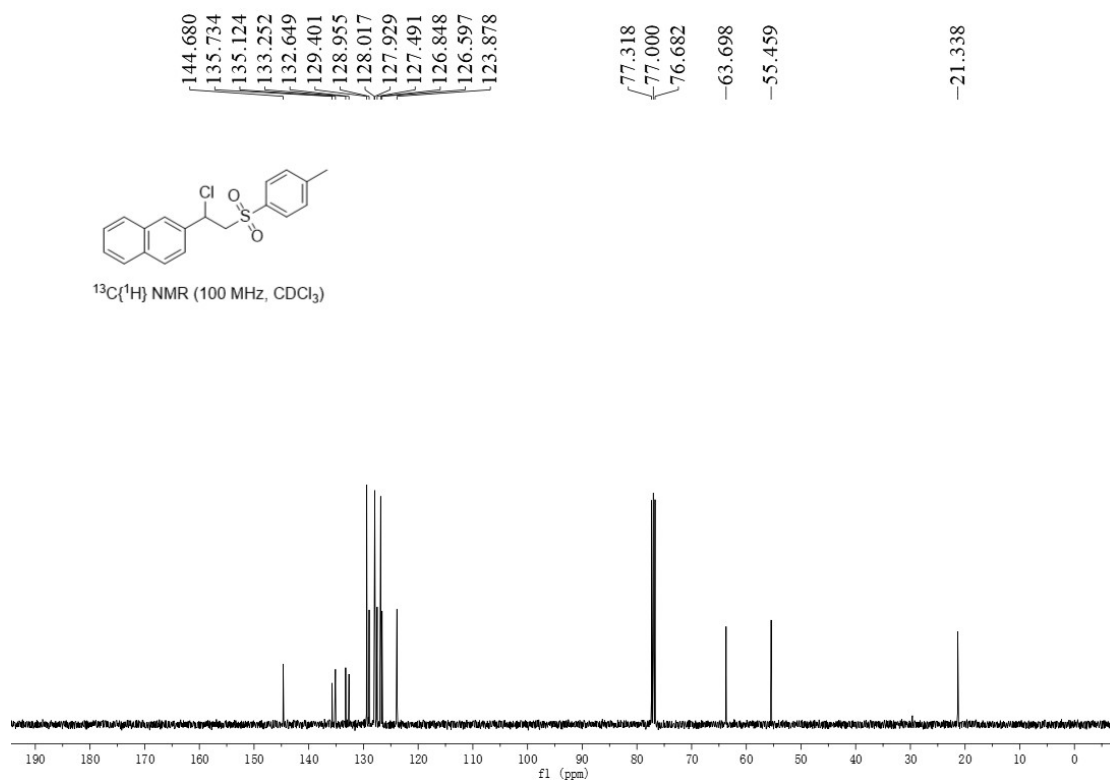

#### 5.4 Failed substrates

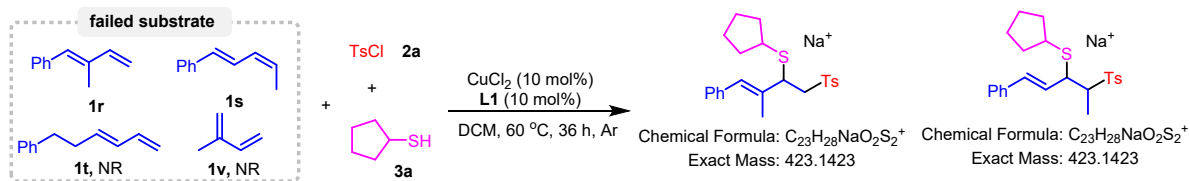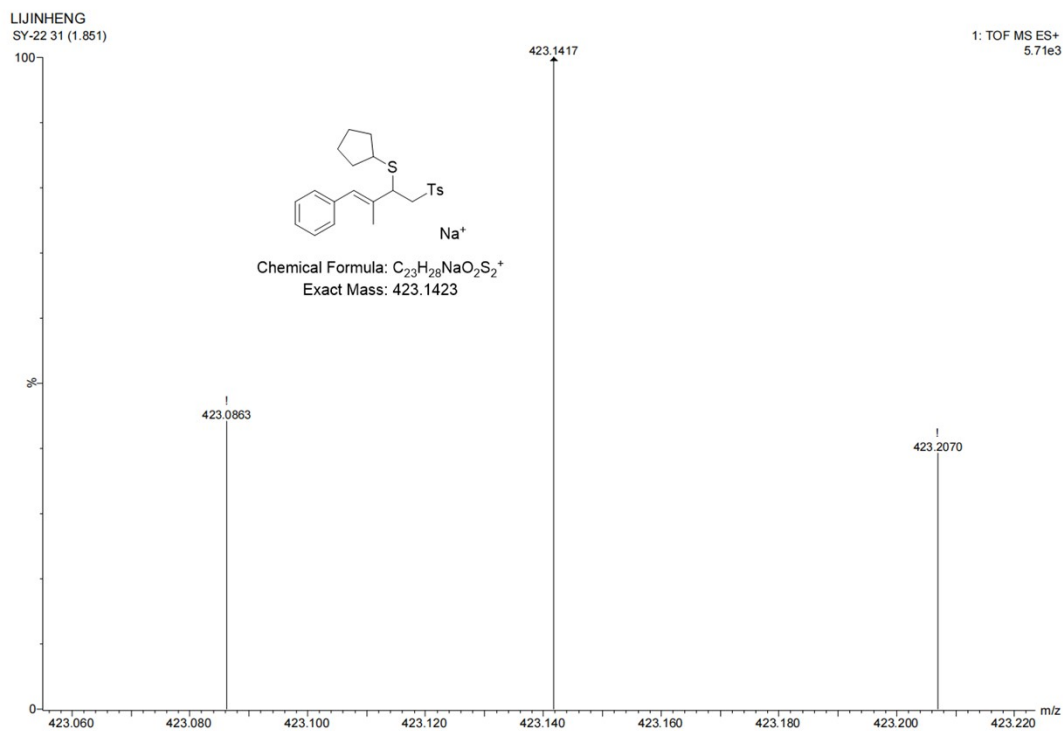

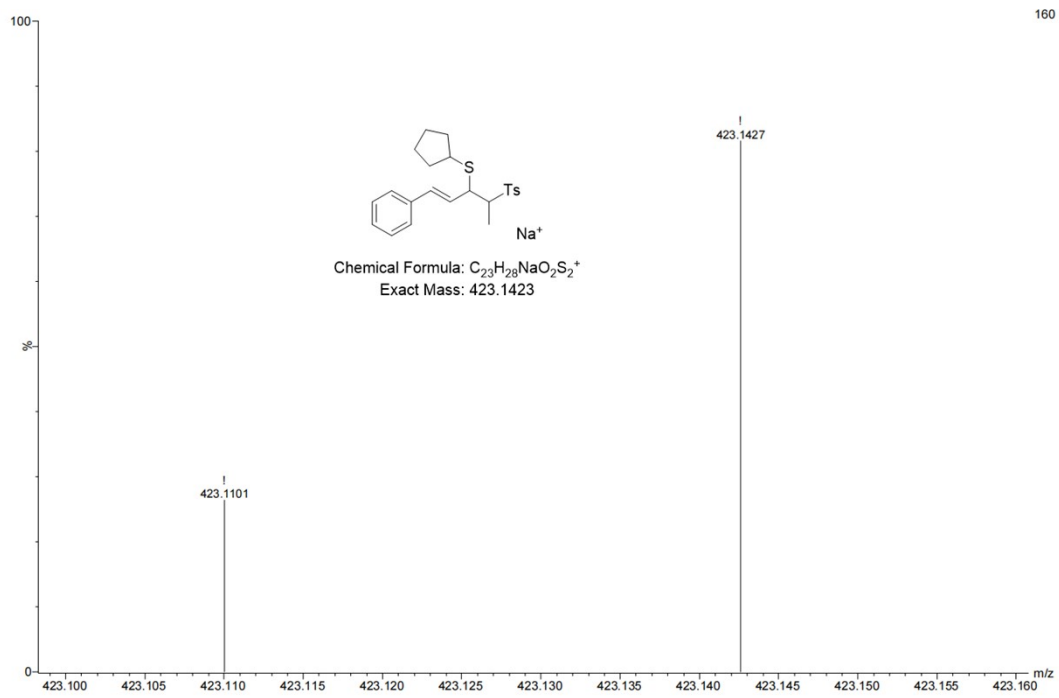

## 6. Characterization data of products

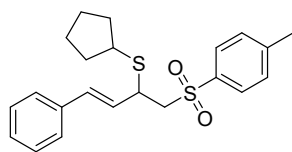

(*E*)-cyclopentyl(4-phenyl-1-tosylbut-3-en-2-yl)sulfane (**4a**), by silica gel column chromatography (hexane/ethyl acetate = 15:1), 52.5 mg, 68% yield, Yellow solid (mp 55-57 °C), <sup>1</sup>H NMR (400 MHz, CDCl<sub>3</sub>) δ: 7.71 (d, *J* = 8.1 Hz, 2H), 7.30 – 7.21 (m, 3H), 7.17 (dd, *J* = 7.1, 5.0 Hz, 4H), 6.28 (d, *J* = 15.7 Hz, 1H), 5.64 (dd, *J* = 15.7, 9.6 Hz, 1H), 3.90 (td, *J* = 8.9, 5.8 Hz, 1H), 3.52 – 3.35 (m, 2H), 3.03-2.96 (m, 1H), 2.27 (s, 3H), 1.98-1.86 (m, 2H), 1.76 – 1.67 (m, 2H), 1.60 – 1.48 (m, 3H), 1.45-1.38 (m, 1H); <sup>13</sup>C{<sup>1</sup>H} NMR (100 MHz, CDCl<sub>3</sub>) δ: 144.7, 136.4, 135.9, 131.8, 129.7, 128.4, 128.3, 127.7, 127.2, 126.4, 60.2, 42.6, 42.2, 34.1, 32.9, 24.9, 24.7, 21.4; HRMS (ESI-TOF) *m/z*: C<sub>22</sub>H<sub>26</sub>NaO<sub>2</sub>S<sub>2</sub><sup>+</sup> (M + Na)<sup>+</sup> calcd for 409.1266, found 409.1275.

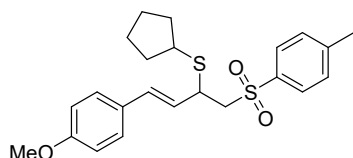

(*E*)-cyclopentyl(4-(4-methoxyphenyl)-1-tosylbut-3-en-2-yl)sulfane (**4b**), by silica gel column chromatography (hexane/ethyl acetate = 10:1), 35.8 mg, 43% yield, Yellow solid (mp 81-83 °C), <sup>1</sup>H NMR (400 MHz, CDCl<sub>3</sub>) δ: 7.70 (d, *J* = 8.2 Hz, 2H), 7.19 (d, *J* = 8.0 Hz, 2H), 7.10 (d, *J* = 8.6 Hz, 2H), 6.81 (d, *J* = 8.7 Hz, 2H), 6.24 (d, *J* = 15.6 Hz, 1H), 5.48 (dd, *J* = 15.6, 9.5 Hz, 1H), 3.89 (td, *J* = 9.2, 5.3 Hz, 1H), 3.81 (s, 3H), 3.51 – 3.37 (m, 2H), 3.03-2.96 (m, 1H), 2.31 (s, 3H), 2.00 – 1.84 (m, 2H), 1.76 – 1.65 (m, 2H), 1.59 – 1.48 (m, 3H), 1.45-1.37 (m, 1H); <sup>13</sup>C{<sup>1</sup>H} NMR (100 MHz, CDCl<sub>3</sub>) δ: 159.3, 144.6, 136.6, 131.4, 129.7, 128.8, 128.4, 127.7, 125.0, 113.8, 60.3, 55.3, 42.7, 42.4, 34.2, 33.0, 25.0, 24.7, 21.5; HRMS (ESI-TOF) *m/z*: C<sub>23</sub>H<sub>28</sub>NaO<sub>3</sub>S<sub>2</sub><sup>+</sup> (M + Na)<sup>+</sup> calcd for 439.1372, found 439.1385.

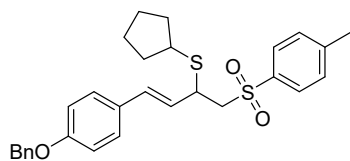

(*E*)-(4-(4-(benzyloxy)phenyl)-1-tosylbut-3-en-2-yl)(cyclopentyl)sulfane (**4c**), by silica gel column chromatography (hexane/ethyl acetate = 10:1), 44.3 mg, 45% yield:

Yellow solid (mp 93-95 °C),  $^1\text{H}$  NMR (400 MHz,  $\text{CDCl}_3$ )  $\delta$ : 7.70 (d,  $J = 7.8$  Hz, 2H), 7.46 – 7.37 (m, 4H), 7.33 (d,  $J = 7.1$  Hz, 1H), 7.17 (d,  $J = 7.9$  Hz, 2H), 7.09 (d,  $J = 8.2$  Hz, 2H), 6.88 (d,  $J = 8.3$  Hz, 2H), 6.23 (d,  $J = 15.6$  Hz, 1H), 5.48 (dd,  $J = 15.6, 9.6$  Hz, 1H), 5.07 (s, 2H), 3.94 – 3.82 (m, 1H), 3.51 – 3.35 (m, 2H), 3.02-2.95 (m, 1H), 2.27 (s, 3H), 2.02 – 1.82 (m, 2H), 1.77 – 1.64 (m, 2H), 1.58 – 1.47 (m, 3H), 1.45 – 1.37 (m, 1H);  $^{13}\text{C}\{^1\text{H}\}$  NMR (100 MHz,  $\text{CDCl}_3$ )  $\delta$ : 158.5, 144.6, 136.8, 136.6, 131.4, 129.7, 129.0, 128.6, 128.4, 128.0, 127.7, 127.4, 125.2, 114.8, 70.0, 60.3, 42.6, 42.4, 34.2, 33.0, 24.9, 24.7, 21.5; HRMS (ESI-TOF)  $m/z$ :  $\text{C}_{29}\text{H}_{32}\text{NaO}_3\text{S}_2^+$  ( $\text{M} + \text{Na}$ ) $^+$  calcd for 515.1685, found 515.1693.

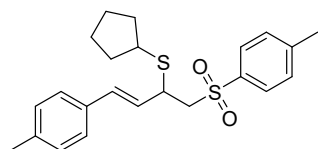

(*E*)-cyclopentyl(4-(*p*-tolyl)-1-tosylbut-3-en-2-yl)sulfane (**4d**), by silica gel column chromatography (hexane/ethyl acetate = 15:1), 46.4 mg, 58% yield, Yellow oil (mp 75-77 °C),  $^1\text{H}$  NMR (400 MHz,  $\text{CDCl}_3$ )  $\delta$ : 7.70 (d,  $J = 8.2$  Hz, 2H), 7.18 (d,  $J = 8.0$  Hz, 2H), 7.11 – 7.02 (m, 4H), 6.25 (d,  $J = 15.6$  Hz, 1H), 5.58 (dd,  $J = 15.6, 9.6$  Hz, 1H), 3.89 (td,  $J = 9.0, 5.5$  Hz, 1H), 3.51 – 3.32 (m, 2H), 3.02-2.95 (m, 1H), 2.33 (s, 3H), 2.29 (s, 3H), 1.97-1.85 (m, 2H), 1.76 – 1.65 (m, 2H), 1.59 – 1.46 (m, 3H), 1.43-1.37 (m, 1H);  $^{13}\text{C}\{^1\text{H}\}$  NMR (100 MHz,  $\text{CDCl}_3$ )  $\delta$ : 144.6, 137.6, 136.5, 133.2, 131.8, 129.7, 129.1, 128.3, 126.3, 126.2, 60.3, 42.6, 42.3, 34.2, 33.0, 24.9, 24.7, 21.4, 21.2; HRMS (ESI-TOF)  $m/z$ :  $\text{C}_{23}\text{H}_{28}\text{NaO}_2\text{S}_2^+$  ( $\text{M} + \text{Na}$ ) $^+$  calcd for 423.1423, found 423.1433.

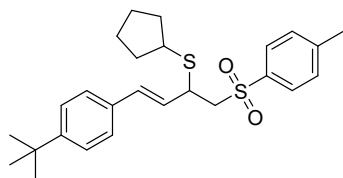

(*E*)-(4-(4-(*tert*-butyl)phenyl)-1-tosylbut-3-en-2-yl)(cyclopentyl)sulfane (**4e**), by silica gel column chromatography (hexane/ethyl acetate = 15:1), 63.7 mg, 72% yield: Yellow solid (mp 51-53 °C),  $^1\text{H}$  NMR (400 MHz,  $\text{CDCl}_3$ )  $\delta$ : 7.70 (d,  $J = 8.2$  Hz, 2H), 7.30 (d,  $J = 8.3$  Hz, 2H), 7.16 (d,  $J = 8.0$  Hz, 2H), 7.11 (d,  $J = 8.3$  Hz, 2H), 6.24 (d,  $J = 15.6$  Hz, 1H), 5.57 (dd,  $J = 15.6, 9.6$  Hz, 1H), 3.88 (td,  $J = 8.9, 5.7$  Hz, 1H), 3.47-

3.42 (m, 2H), 3.01-2.95 (m, 1H), 2.25 (s, 3H), 2.00 – 1.82 (m, 2H), 1.75 – 1.65 (m, 2H), 1.59 – 1.46 (m, 3H), 1.45 – 1.37 (m, 1H), 1.31 (s, 9H);  $^{13}\text{C}\{^1\text{H}\}$  NMR (100 MHz,  $\text{CDCl}_3$ )  $\delta$ : 150.9, 144.6, 136.4, 133.2, 131.6, 129.7, 128.3, 126.4, 126.1, 125.3, 60.2, 42.6, 42.3, 34.5, 34.2, 32.9, 31.2, 24.9, 24.7, 21.4; HRMS (ESI-TOF)  $m/z$ :  $\text{C}_{26}\text{H}_{34}\text{NaO}_2\text{S}_2^+$  ( $\text{M} + \text{Na}$ ) $^+$  calcd for 465.1892, found 465.1901.

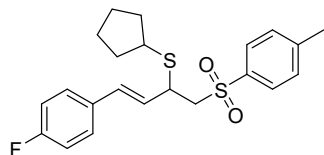

(*E*)-cyclopentyl(4-(4-fluorophenyl)-1-tosylbut-3-en-2-yl)sulfane (**4f**), by silica gel column chromatography (hexane/ethyl acetate = 15:1), 60.6 mg, 75% yield, Yellow solid (mp 94-96 °C),  $^1\text{H}$  NMR (400 MHz,  $\text{CDCl}_3$ )  $\delta$ : 7.71 (d,  $J$  = 8.2 Hz, 2H), 7.20 (d,  $J$  = 8.0 Hz, 2H), 7.15 (dd,  $J$  = 8.6, 5.5 Hz, 2H), 6.96 (t,  $J$  = 8.6 Hz, 2H), 6.27 (d,  $J$  = 15.7 Hz, 1H), 5.59 (dd,  $J$  = 15.7, 9.5 Hz, 1H), 3.90 (td,  $J$  = 9.1, 5.4 Hz, 1H), 3.52 – 3.35 (m, 2H), 3.02-2.95 (m, 1H), 2.30 (s, 3H), 2.01 – 1.84 (m, 2H), 1.72 – 1.62 (m, 2H), 1.60 – 1.48 (m, 3H), 1.47 – 1.37 (m, 1H);  $^{13}\text{C}\{^1\text{H}\}$  NMR (100 MHz,  $\text{CDCl}_3$ )  $\delta$ : 162.3 (d,  $J$  = 245.9 Hz, 1C), 144.7, 136.5, 132.1 (d,  $J$  = 3.3 Hz, 1C), 130.5, 129.7, 128.2, 127.9 (d,  $J$  = 8 Hz, 1C), 127.1, 115.3 (d,  $J$  = 21.4 Hz, 1C), 60.1, 42.7, 42.1, 34.1, 33.0, 24.9, 24.7, 21.4;  $^{19}\text{F}$  NMR (376 MHz,  $\text{CDCl}_3$ )  $\delta$  -113.8 (s, 1F); HRMS (ESI-TOF)  $m/z$ :  $\text{C}_{22}\text{H}_{25}\text{FNaO}_2\text{S}_2^+$  ( $\text{M} + \text{Na}$ ) $^+$  calcd for 427.1172, found 427.1185.

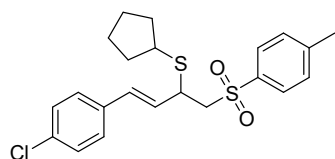

(*E*)-(4-(4-chlorophenyl)-1-tosylbut-3-en-2-yl)(cyclopentyl)sulfane (**4g**), by silica gel column chromatography (hexane/ethyl acetate = 15:1), 59.7 mg, 71% yield, Yellow solid (mp 79-81 °C),  $^1\text{H}$  NMR (400 MHz,  $\text{CDCl}_3$ )  $\delta$ : 7.71 (d,  $J$  = 8.1 Hz, 2H), 7.28 – 7.17 (m, 4H), 7.11 (d,  $J$  = 8.4 Hz, 2H), 6.26 (d,  $J$  = 15.7 Hz, 1H), 5.66 (dd,  $J$  = 15.6, 9.5 Hz, 1H), 3.90 (td,  $J$  = 9.3, 4.9 Hz, 1H), 3.53 – 3.34 (m, 2H), 3.05 – 2.92 (m, 1H), 2.31 (s, 3H), 2.02 – 1.84 (m, 2H), 1.74-1.65 (m, 2H), 1.59 – 1.48 (m, 3H), 1.47 – 1.38 (m, 1H);  $^{13}\text{C}\{^1\text{H}\}$  NMR (100 MHz,  $\text{CDCl}_3$ )  $\delta$ : 144.8, 136.5, 134.5, 133.4, 130.5, 129.7, 128.6, 128.3, 128.1, 127.6, 60.1, 42.8, 42.1, 34.2, 33.0, 24.9, 24.7, 21.5;

HRMS (ESI-TOF)  $m/z$ :  $C_{22}H_{25}ClNaO_2S_2^+$  ( $M + Na$ ) $^+$  calcd for 443.0877, found 443.0883.

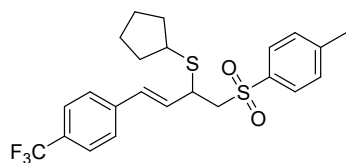

(*E*)-3-(3-(cyclopentylthio)-4-tosylbut-1-en-1-yl)thiophene (**4h**), by silica gel column chromatography (hexane/ethyl acetate = 15:1), 55.4 mg, 61% yield, Yellow solid (mp 105-107 °C),  $^1H$  NMR (400 MHz,  $CDCl_3$ )  $\delta$ : 7.71 (d,  $J = 8.1$  Hz, 2H), 7.53 (d,  $J = 8.1$  Hz, 2H), 7.33 – 7.25 (m, 2H), 7.20 (d,  $J = 8.0$  Hz, 2H), 6.34 (d,  $J = 15.7$  Hz, 1H), 5.81 (dd,  $J = 15.7, 9.5$  Hz, 1H), 4.01 – 3.85 (m, 1H), 3.54 – 3.35 (m, 2H), 3.06 – 2.92 (m, 1H), 2.29 (s, 3H), 2.03 – 1.84 (m, 2H), 1.79 – 1.65 (m, 2H), 1.60 – 1.48 (m, 3H), 1.48 – 1.39 (m, 1H);  $^{13}C\{^1H\}$  NMR (100 MHz,  $CDCl_3$ )  $\delta$ : 144.9, 139.5, 136.5, 130.2 (q,  $J = 12.1$  Hz, 1C), 129.8, 129.5 (q,  $J = 32.2$  Hz, 1C), 129.1, 128.3, 126.6, 125.4 (q,  $J = 3.8$  Hz, 1C), 124.0 (q,  $J = 273.3$  Hz, 1C), 60.0, 42.8, 42.0, 34.2, 33.1, 24.9, 24.7, 21.4;  $^{19}F$  NMR (376 MHz,  $CDCl_3$ )  $\delta$  -62.6 (s, 3F); HRMS (ESI-TOF)  $m/z$ :  $C_{23}H_{25}F_3NaO_2S_2^+$  ( $M + Na$ ) $^+$  calcd for 477.1140, found 477.1151.

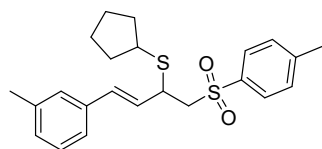

(*E*)-cyclopentyl(4-(*m*-tolyl)-1-tosylbut-3-en-2-yl)sulfane (**4i**), by silica gel column chromatography (hexane/ethyl acetate = 15:1), 44.0 mg, 55% yield, Yellow oil,  $^1H$  NMR (400 MHz,  $CDCl_3$ )  $\delta$ : 7.71 (d,  $J = 8.2$  Hz, 2H), 7.17 (dd,  $J = 15.0, 7.7$  Hz, 3H), 7.04 (d,  $J = 7.5$  Hz, 1H), 6.97 (d,  $J = 11.4$  Hz, 2H), 6.25 (d,  $J = 15.7$  Hz, 1H), 5.62 (dd,  $J = 15.6, 9.6$  Hz, 1H), 3.89 (td,  $J = 9.1, 5.4$  Hz, 1H), 3.50 – 3.36 (m, 2H), 3.05 – 2.92 (m, 1H), 2.32 (s, 3H), 2.30 (s, 3H), 1.98-1.85 (m, 2H), 1.74-1.65 (m, 2H), 1.59 – 1.46 (m, 3H), 1.46 – 1.37 (m, 1H);  $^{13}C\{^1H\}$  NMR (100 MHz,  $CDCl_3$ )  $\delta$ : 144.7, 137.9, 136.5, 135.9, 132.0, 129.7, 128.6, 128.4, 128.3, 127.1, 127.0, 123.7, 60.2, 42.6, 42.3, 34.2, 32.9, 25.0, 24.7, 21.5, 21.3; HRMS (ESI-TOF)  $m/z$ :  $C_{23}H_{28}NaO_2S_2^+$  ( $M + Na$ ) $^+$  calcd for 423.1423, found 423.1429.

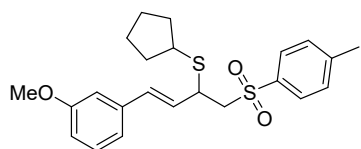

(*E*)-cyclopentyl(4-(3-methoxyphenyl)-1-tosylbut-3-en-2-yl)sulfane (**4j**), by silica gel column chromatography (hexane/ethyl acetate = 10:1), 49.9 mg, 60% yield, Yellow solid (mp 91-93 °C), <sup>1</sup>H NMR (400 MHz, CDCl<sub>3</sub>) δ: 7.70 (d, *J* = 8.2 Hz, 2H), 7.21-7.17 (m, 3H), 6.82 – 6.74 (m, 2H), 6.69 (s, 1H), 6.25 (d, *J* = 15.6 Hz, 1H), 5.63 (dd, *J* = 15.6, 9.6 Hz, 1H), 3.90 (td, *J* = 9.1, 5.4 Hz, 1H), 3.80 (s, 3H), 3.51 – 3.38 (m, 2H), 3.02-2.96 (m, 1H), 2.29 (s, 3H), 2.01 – 1.84 (m, 2H), 1.76 – 1.66 (m, 2H), 1.61 – 1.48 (m, 3H), 1.47 – 1.38 (m, 1H); <sup>13</sup>C{<sup>1</sup>H} NMR (100 MHz, CDCl<sub>3</sub>) δ: 144.7, 137.9, 136.5, 135.9, 132.0, 129.7, 128.6, 128.4, 128.3, 127.1, 127.0, 123.7, 60.2, 42.6, 42.3, 34.2, 32.9, 25.0, 24.7, 21.5, 21.3; HRMS (ESI-TOF) *m/z*: C<sub>23</sub>H<sub>28</sub>NaO<sub>3</sub>S<sub>2</sub><sup>+</sup> (M + Na)<sup>+</sup> calcd for 439.1372, found 439.1378.

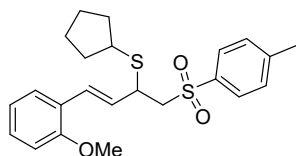

(*E*)-cyclopentyl(4-(2-methoxyphenyl)-1-tosylbut-3-en-2-yl)sulfane (**4k**), by silica gel column chromatography (hexane/ethyl acetate = 10:1), 37.5 mg, 45% yield, Yellow solid (mp 73-75 °C), <sup>1</sup>H NMR (400 MHz, CDCl<sub>3</sub>) δ: 7.72 (d, *J* = 8.0 Hz, 2H), 7.19 (t, *J* = 9.6 Hz, 3H), 7.11 (d, *J* = 7.2 Hz, 1H), 6.85 (t, *J* = 7.1 Hz, 2H), 6.61 (d, *J* = 15.8 Hz, 1H), 5.63 (dd, *J* = 15.8, 9.6 Hz, 1H), 3.89 (dd, *J* = 15.9, 7.6 Hz, 1H), 3.83 (s, 3H), 3.45 (d, *J* = 7.0 Hz, 2H), 3.03 – 2.97 (m, 1H), 2.29 (s, 3H), 2.00 – 1.96 (m, 1H), 1.93 – 1.84 (m, 1H), 1.73-1.67 (m, 2H), 1.59 – 1.48 (m, 3H), 1.46 – 1.38 (m, 1H); <sup>13</sup>C{<sup>1</sup>H} NMR (100 MHz, CDCl<sub>3</sub>) δ: 156.6, 144.6, 136.5, 129.6, 128.8, 128.5, 127.5, 126.8, 126.8, 125.1, 120.4, 110.7, 60.3, 55.4, 42.8, 42.6, 34.2, 32.9, 25.0, 24.7, 21.5; HRMS (ESI-TOF) *m/z*: C<sub>23</sub>H<sub>28</sub>NaO<sub>3</sub>S<sub>2</sub><sup>+</sup> (M + Na)<sup>+</sup> calcd for 439.1372, found 439.1381.

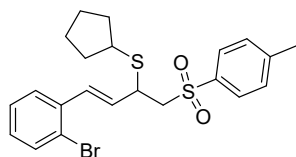

(*E*)-(4-(2-bromophenyl)-1-tosylbut-3-en-2-yl)(cyclopentyl)sulfane (**4l**), by silica gel column chromatography (hexane/ethyl acetate = 15:1), 39.0 mg, 42% yield, Yellow

solid (mp 61-63 °C), <sup>1</sup>H NMR (400 MHz, CDCl<sub>3</sub>) δ: 7.75 (d, *J* = 8.0 Hz, 2H), 7.54 (d, *J* = 7.9 Hz, 1H), 7.25 (d, *J* = 7.9 Hz, 3H), 7.20 (d, *J* = 4.2 Hz, 2H), 7.14 – 7.05 (m, 1H), 6.61 (d, *J* = 15.5 Hz, 1H), 5.63 (dd, *J* = 15.5, 9.6 Hz, 1H), 3.89 (td, *J* = 9.2, 5.2 Hz, 1H), 3.51 – 3.36 (m, 2H), 3.10 – 2.94 (m, 1H), 2.31 (s, 3H), 2.05-2.01 (m, 1H), 1.97 – 1.85 (m, 1H), 1.79 – 1.65 (m, 2H), 1.57-1.51 (m, 3H), 1.44 – 1.38 (m, 1H); <sup>13</sup>C{<sup>1</sup>H} NMR (100 MHz, CDCl<sub>3</sub>) δ: 144.9, 136.4, 136.1, 132.8, 130.4, 130.1, 129.8, 129.0, 128.4, 127.4, 127.2, 123.4, 60.0, 42.7, 42.1, 34.2, 32.8, 25.0, 24.8, 21.5; HRMS (ESI-TOF) *m/z*: C<sub>22</sub>H<sub>25</sub>BrNaO<sub>2</sub>S<sub>2</sub><sup>+</sup> (M + Na)<sup>+</sup> calcd for 487.0372, found 487.0383.

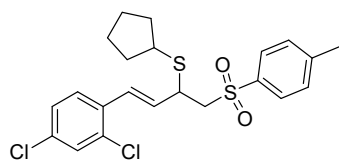

(*E*)-cyclopentyl(4-(2,4-dichlorophenyl)-1-tosylbut-3-en-2-yl)sulfane (**4m**), by silica gel column chromatography (hexane/ethyl acetate = 15:1), 33.6 mg, 37% yield, Yellow solid (mp 51-53 °C), <sup>1</sup>H NMR (400 MHz, CDCl<sub>3</sub>) δ: 7.74 (d, *J* = 8.0 Hz, 2H), 7.36 (s, 1H), 7.26 (d, *J* = 7.6 Hz, 2H), 7.16 (q, *J* = 8.5 Hz, 2H), 6.59 (d, *J* = 15.6 Hz, 1H), 5.70 (dd, *J* = 15.6, 9.6 Hz, 1H), 3.95 – 3.83 (m, 1H), 3.50 – 3.35 (m, 2H), 3.05 – 2.93 (m, 1H), 2.34 (s, 3H), 2.03 – 1.95 (m, 1H), 1.95 – 1.85 (m, 1H), 1.76 – 1.65 (m, 2H), 1.60 – 1.49 (m, 3H), 1.45-1.39 (m, 1H); <sup>13</sup>C{<sup>1</sup>H} NMR (100 MHz, CDCl<sub>3</sub>) δ: 144.9, 136.4, 133.8, 133.4, 133.0, 130.7, 129.8, 129.3, 128.3, 127.7, 127.1, 126.7, 60.0, 42.8, 42.1, 34.2, 32.9, 24.9, 24.7, 21.5; HRMS (ESI-TOF) *m/z*: C<sub>22</sub>H<sub>24</sub>Cl<sub>2</sub>NaO<sub>2</sub>S<sub>2</sub><sup>+</sup> (M + Na)<sup>+</sup> calcd for 477.0487, found 477.0492.

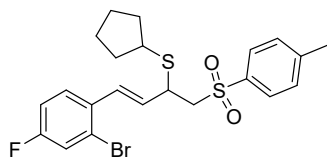

(*E*)-(4-(2-bromo-4-fluorophenyl)-1-tosylbut-3-en-2-yl)(cyclopentyl)sulfane (**4n**), by silica gel column chromatography (hexane/ethyl acetate = 15:1), 31.8 mg, 33% yield, Yellow solid (mp 59-61 °C), <sup>1</sup>H NMR (400 MHz, CDCl<sub>3</sub>) δ: 7.75 (d, *J* = 7.4 Hz, 2H), 7.28 (t, *J* = 7.7 Hz, 3H), 7.23 – 7.17 (m, 1H), 6.94 (t, *J* = 8.2 Hz, 1H), 6.56 (d, *J* = 15.5 Hz, 1H), 5.61 (dd, *J* = 15.5, 9.6 Hz, 1H), 3.89 (td, *J* = 9.2, 5.3 Hz, 1H), 3.54 –

3.34 (m, 2H), 3.11 – 2.90 (m, 1H), 2.34 (s, 3H), 2.06 – 1.97 (m, 1H), 1.97 – 1.86 (m, 1H), 1.77 – 1.66 (m, 2H), 1.62 – 1.49 (m, 3H), 1.46 – 1.37 (m, 1H);  $^{13}\text{C}\{^1\text{H}\}$  NMR (100 MHz,  $\text{CDCl}_3$ )  $\delta$ : 161.7 (d,  $J = 250.3$  Hz, 1C), 144.8, 136.4, 132.5 (d,  $J = 3.6$  Hz, 1C), 130.1 (d,  $J = 2.5$  Hz, 1C), 129.8, 129.2, 128.3, 128.1 (d,  $J = 7.8$  Hz, 1C), 123.2 (d,  $J = 9.3$  Hz, 1C), 119.7 (d,  $J = 24.2$  Hz, 1C), 114.7 (d,  $J = 21.2$  Hz, 1C), 59.9, 42.7, 42.0, 34.2, 32.8, 24.9, 24.7, 21.5;  $^{19}\text{F}$  NMR (376 MHz,  $\text{CDCl}_3$ )  $\delta$  -112.2 (s, 1F); HRMS (ESI-TOF)  $m/z$ :  $\text{C}_{22}\text{H}_{24}\text{BrFNaO}_2\text{S}_2^+$  ( $\text{M} + \text{Na}$ ) $^+$  calcd for 505.0277, found 505.0283.

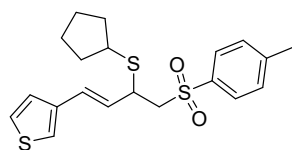

(*E*)-3-(3-(cyclopentylthio)-4-tosylbut-1-en-1-yl)thiophene (**4o**), by silica gel column chromatography (hexane/ethyl acetate = 15:1), 40.0 mg, 51% yield, Yellow solid (mp 66-68 °C),  $^1\text{H}$  NMR (400 MHz,  $\text{CDCl}_3$ )  $\delta$ : 7.70 (d,  $J = 8.0$  Hz, 2H), 7.21 (t,  $J = 7.7$  Hz, 3H), 7.05 (s, 1H), 6.94 (d,  $J = 5.0$  Hz, 1H), 6.32 (d,  $J = 15.6$  Hz, 1H), 5.49 (dd,  $J = 15.6, 9.5$  Hz, 1H), 3.86 (td,  $J = 9.3, 5.0$  Hz, 1H), 3.51 – 3.33 (m, 2H), 3.03-2.96 (m, 1H), 2.31 (s, 3H), 1.98-1.86 (m, 2H), 1.70-1.67 (m, 2H), 1.59 – 1.48 (m, 3H), 1.46 – 1.39 (m, 1H);  $^{13}\text{C}\{^1\text{H}\}$  NMR (100 MHz,  $\text{CDCl}_3$ )  $\delta$ : 144.7, 138.7, 136.6, 129.7, 128.3, 127.2, 126.1, 125.8, 124.9, 122.5, 60.3, 42.7, 42.2, 34.2, 33.0, 24.9, 24.7, 21.5; HRMS (ESI-TOF)  $m/z$ :  $\text{C}_{20}\text{H}_{24}\text{NaO}_2\text{S}_3^+$  ( $\text{M} + \text{Na}$ ) $^+$  calcd for 415.0831, found 415.0839.

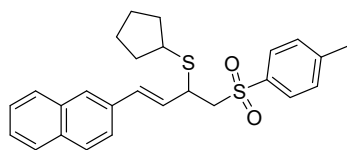

(*E*)-cyclopentyl(4-(naphthalen-2-yl)-1-tosylbut-3-en-2-yl)sulfane (**4p**), by silica gel column chromatography (hexane/ethyl acetate = 12:1), 43.6 mg, 50% yield, Yellow solid (mp 75-77 °C),  $^1\text{H}$  NMR (400 MHz,  $\text{CDCl}_3$ )  $\delta$ : 7.77 (s, 2H), 7.71 (d,  $J = 8.2$  Hz, 3H), 7.57 (s, 1H), 7.49 – 7.41 (m, 2H), 7.30 (d,  $J = 8.5$  Hz, 1H), 7.13 (d,  $J = 7.9$  Hz, 2H), 6.45 (d,  $J = 15.6$  Hz, 1H), 5.75 (dd,  $J = 15.6, 9.6$  Hz, 1H), 3.97 (dd,  $J = 15.3, 8.1$  Hz, 1H), 3.49 (d,  $J = 6.8$  Hz, 2H), 3.06-2.99 (m, 1H), 2.17 (s, 3H), 2.00-1.97 (m, 1H),

1.92-1.88 (m, 1H), 1.76 – 1.65 (m, 2H), 1.61 – 1.47 (m, 3H), 1.45-1.41 (m, 1H);  $^{13}\text{C}\{^1\text{H}\}$  NMR (100 MHz,  $\text{CDCl}_3$ )  $\delta$ : 144.7, 136.5, 133.4, 133.4, 133.0, 131.9, 129.7, 128.3, 128.0, 127.9, 127.6 (2C), 126.4, 126.3, 126.0, 123.4, 60.2, 42.7, 42.4, 34.2, 33.0, 24.9, 24.7, 21.4; HRMS (ESI-TOF)  $m/z$ :  $\text{C}_{26}\text{H}_{28}\text{NaO}_2\text{S}_2^+$  ( $\text{M} + \text{Na}$ ) $^+$  calcd for 459.1423, found 459.1429.

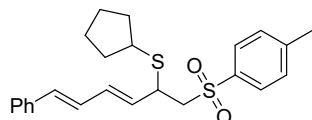

Cyclopentyl((3E,5E)-6-phenyl-1-tosylhexa-3,5-dien-2-yl)sulfane (**4q**), by silica gel column chromatography (hexane/ethyl acetate = 15:1), 34.6 mg, 42% yield, Yellow solid (mp 49-51 °C),  $^1\text{H}$  NMR (400 MHz,  $\text{CDCl}_3$ )  $\delta$ : 7.71 (d,  $J = 8.1$  Hz, 2H), 7.35 – 7.28 (m, 6H), 7.28 – 7.21 (m, 1H), 6.17 – 5.96 (m, 2H), 5.87 (dd,  $J = 14.3, 8.8$  Hz, 1H), 5.63 – 5.49 (m, 1H), 4.46 (d,  $J = 8.8$  Hz, 1H), 3.79 (d,  $J = 7.7$  Hz, 2H), 2.97 – 2.75 (m, 1H), 2.43 (s, 3H), 2.00 – 1.85 (m, 2H), 1.73-1.69 (m, 2H), 1.59 – 1.47 (m, 4H);  $^{13}\text{C}\{^1\text{H}\}$  NMR (100 MHz,  $\text{CDCl}_3$ )  $\delta$ : 144.7, 140.4, 138.4, 136.2, 135.5, 129.7, 129.1, 128.6, 128.4, 127.7, 127.3, 118.2, 60.3, 51.9, 43.3, 33.8, 33.4, 24.9, 24.8, 21.6; HRMS (ESI-TOF)  $m/z$ :  $\text{C}_{24}\text{H}_{28}\text{NaO}_2\text{S}_2^+$  ( $\text{M} + \text{Na}$ ) $^+$  calcd for 435.1423, found 435.1431.

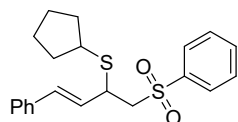

(*E*)-cyclopentyl(4-phenyl-1-(phenylsulfonyl)but-3-en-2-yl)sulfane (**4r**), by silica gel column chromatography (hexane/ethyl acetate = 15:1), 46.1 mg, 62% yield, Yellow solid (mp 57-59 °C),  $^1\text{H}$  NMR (400 MHz,  $\text{CDCl}_3$ )  $\delta$ : 7.85 (d,  $J = 7.7$  Hz, 2H), 7.52 (t,  $J = 7.4$  Hz, 1H), 7.42 (t,  $J = 7.7$  Hz, 2H), 7.31 – 7.23 (m, 3H), 7.20 (d,  $J = 7.2$  Hz, 2H), 6.35 (d,  $J = 15.6$  Hz, 1H), 5.70 (dd,  $J = 15.6, 9.6$  Hz, 1H), 3.93 (td,  $J = 9.0, 5.7$  Hz, 1H), 3.55 – 3.39 (m, 2H), 3.04-2.97 (m, 1H), 2.01 – 1.85 (m, 2H), 1.75 – 1.65 (m, 2H), 1.59 – 1.48 (m, 3H), 1.45 – 1.38 (m, 1H);  $^{13}\text{C}\{^1\text{H}\}$  NMR (100 MHz,  $\text{CDCl}_3$ )  $\delta$ : 139.6, 135.9, 133.6, 132.0, 129.1, 128.4, 128.3, 127.9, 127.2, 126.5, 60.2, 42.7, 42.2, 34.2, 33.0, 24.9, 24.7; HRMS (ESI-TOF)  $m/z$ :  $\text{C}_{21}\text{H}_{24}\text{NaO}_2\text{S}_2^+$  ( $\text{M} + \text{Na}$ ) $^+$  calcd for 395.1110, found 395.1115.

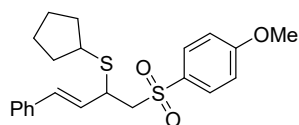

(*E*)-cyclopentyl(1-((4-methoxyphenyl)sulfonyl)-4-phenylbut-3-en-2-yl)sulfane (**4s**), by silica gel column chromatography (hexane/ethyl acetate = 12:1), 44.2 mg, 55% yield, Yellow solid (mp 72-74 °C), <sup>1</sup>H NMR (400 MHz, CDCl<sub>3</sub>) δ: 7.80 – 7.70 (m, 2H), 7.31 – 7.22 (m, 3H), 7.21 – 7.16 (m, 2H), 6.87 – 6.76 (m, 2H), 6.29 (d, *J* = 15.7 Hz, 1H), 5.63 (dd, *J* = 15.7, 9.6 Hz, 1H), 3.90 (td, *J* = 9.5, 4.6 Hz, 1H), 3.70 (s, 3H), 3.53 – 3.37 (m, 2H), 3.03-2.96 (m, 1H), 2.02 – 1.86 (m, 2H), 1.74 – 1.65 (m, 2H), 1.61 – 1.49 (m, 3H), 1.47 – 1.38 (m, 1H); <sup>13</sup>C{<sup>1</sup>H} NMR (100 MHz, CDCl<sub>3</sub>) δ: 163.5, 136.0, 131.8, 130.8, 130.6, 128.4, 127.8, 127.3, 126.4, 114.2, 60.3, 55.5, 42.6, 42.3, 34.2, 32.9, 24.9, 24.7; HRMS (ESI-TOF) *m/z*: C<sub>22</sub>H<sub>26</sub>NaO<sub>3</sub>S<sub>2</sub><sup>+</sup> (M + Na)<sup>+</sup> calcd for 425.1216, found 425.1219.

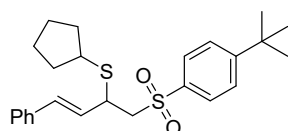

(*E*)-1-((4-(*tert*-butyl)phenyl)sulfonyl)-4-phenylbut-3-en-2-yl(cyclopentyl)sulfane (**4t**), by silica gel column chromatography (hexane/ethyl acetate = 15:1), 66.8 mg, 78% yield, Yellow solid (mp 64-66 °C), <sup>1</sup>H NMR (400 MHz, CDCl<sub>3</sub>) δ: 7.74 (d, *J* = 8.5 Hz, 2H), 7.39 (d, *J* = 8.5 Hz, 2H), 7.32 – 7.19 (m, 3H), 7.19 – 7.13 (m, 2H), 6.34 (d, *J* = 15.7 Hz, 1H), 5.61 (dd, *J* = 15.6, 9.6 Hz, 1H), 3.96 (td, *J* = 9.0, 5.6 Hz, 1H), 3.55 – 3.38 (m, 2H), 3.03-2.96 (m, 1H), 2.03 – 1.84 (m, 2H), 1.77 – 1.66 (m, 2H), 1.60 – 1.47 (m, 3H), 1.45 – 1.37 (m, 1H), 1.22 (s, 9H); <sup>13</sup>C{<sup>1</sup>H} NMR (100 MHz, CDCl<sub>3</sub>) δ: 157.5, 136.4, 136.0, 132.0, 128.5, 128.2, 127.8, 127.2, 126.4, 126.0, 60.1, 42.6, 42.3, 35.1, 34.1, 33.0, 30.8, 24.9, 24.7; HRMS (ESI-TOF) *m/z*: C<sub>25</sub>H<sub>32</sub>NaO<sub>2</sub>S<sub>2</sub><sup>+</sup> (M + Na)<sup>+</sup> calcd for 451.1736, found 451.1741.

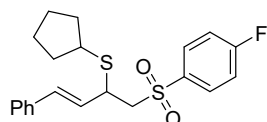

(*E*)-cyclopentyl(1-((4-fluorophenyl)sulfonyl)-4-phenylbut-3-en-2-yl)sulfane (**4u**), by silica gel column chromatography (hexane/ethyl acetate = 15:1), 54.6 mg, 70% yield, Yellow solid (mp 75-77 °C), <sup>1</sup>H NMR (400 MHz, CDCl<sub>3</sub>) δ: 7.85 (dd, *J* = 7.7, 5.5 Hz,

2H), 7.32 – 7.24 (m, 3H), 7.20 (d,  $J = 7.5$  Hz, 2H), 7.06 (t,  $J = 8.3$  Hz, 2H), 6.35 (d,  $J = 15.7$  Hz, 1H), 5.68 (dd,  $J = 15.6, 9.6$  Hz, 1H), 3.93 (td,  $J = 9.3, 4.9$  Hz, 1H), 3.55 – 3.39 (m, 2H), 3.04-2.97 (m, 1H), 2.03 – 1.85 (m, 2H), 1.78 – 1.65 (m, 2H), 1.60 – 1.48 (m, 3H), 1.46 – 1.37 (m, 1H);  $^{13}\text{C}\{^1\text{H}\}$  NMR (100 MHz,  $\text{CDCl}_3$ )  $\delta$ : 165.7 (d,  $J = 255.0$  Hz, 1C), 135.8, 135.6 (d,  $J = 3.1$  Hz, 1C), 132.1, 131.3 (d,  $J = 9.6$  Hz, 1C), 128.5, 128.0, 127.2, 126.4, 116.4 (d,  $J = 22.5$  Hz, 1C), 60.4, 42.7, 42.4, 34.2, 33.0, 24.9, 24.7;  $^{19}\text{F}$  NMR (376 MHz,  $\text{CDCl}_3$ )  $\delta$  -103.3 (s, 1F); HRMS (ESI-TOF)  $m/z$ :  $\text{C}_{21}\text{H}_{23}\text{FNaO}_2\text{S}_2^+$  ( $\text{M} + \text{Na}$ ) $^+$  calcd for 413.1016, found 413.1022.

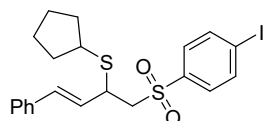

(*E*)-cyclopentyl(1-((4-iodophenyl)sulfonyl)-4-phenylbut-3-en-2-yl)sulfane (**4v**), by silica gel column chromatography (hexane/ethyl acetate = 15:1), 65.7 mg, 66% yield, Yellow solid (mp 81-83 °C),  $^1\text{H}$  NMR (400 MHz,  $\text{CDCl}_3$ )  $\delta$ : 7.74 (d,  $J = 8.3$  Hz, 2H), 7.52 (d,  $J = 8.4$  Hz, 2H), 7.32 (t,  $J = 7.4$  Hz, 2H), 7.28 – 7.22 (m, 1H), 7.16 (d,  $J = 7.4$  Hz, 2H), 6.32 (d,  $J = 15.7$  Hz, 1H), 5.60 (dd,  $J = 15.6, 9.6$  Hz, 1H), 3.92 (td,  $J = 9.4, 4.9$  Hz, 1H), 3.55 – 3.37 (m, 2H), 3.10 – 2.89 (m, 1H), 2.02 – 1.83 (m, 2H), 1.77 – 1.65 (m, 2H), 1.59 – 1.48 (m, 3H), 1.47 – 1.38 (m, 1H);  $^{13}\text{C}\{^1\text{H}\}$  NMR (100 MHz,  $\text{CDCl}_3$ )  $\delta$ : 139.2, 138.4, 135.7, 132.2, 129.7, 128.6, 128.1, 127.0, 126.4, 101.7, 60.1, 42.8, 42.2, 34.2, 33.0, 24.9, 24.7; HRMS (ESI-TOF)  $m/z$ :  $\text{C}_{21}\text{H}_{23}\text{INaO}_2\text{S}_2^+$  ( $\text{M} + \text{Na}$ ) $^+$  calcd for 521.0076, found 521.0081.

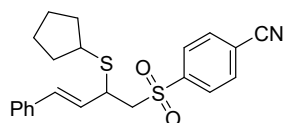

(*E*)-4-((2-(cyclopentylthio)-4-phenylbut-3-en-1-yl)sulfonyl)benzonitrile (**4w**), by silica gel column chromatography (hexane/ethyl acetate = 12:1), 42.1 mg, 53% yield, Yellow solid (mp 105-107 °C),  $^1\text{H}$  NMR (400 MHz,  $\text{CDCl}_3$ )  $\delta$ : 7.93 (d,  $J = 8.4$  Hz, 2H), 7.64 (d,  $J = 8.4$  Hz, 2H), 7.36 – 7.25 (m, 3H), 7.20 – 7.09 (m, 2H), 6.33 (d,  $J = 15.7$  Hz, 1H), 5.55 (dd,  $J = 15.7, 9.7$  Hz, 1H), 3.94 (td,  $J = 9.7, 4.7$  Hz, 1H), 3.62 – 3.41 (m, 2H), 3.10 – 2.92 (m, 1H), 2.04 – 1.85 (m, 2H), 1.76 – 1.64 (m, 2H), 1.60 – 1.48 (m, 3H), 1.45 – 1.35 (m, 1H);  $^{13}\text{C}\{^1\text{H}\}$  NMR (100 MHz,  $\text{CDCl}_3$ )  $\delta$ : 143.8, 135.4, 132.7, 132.5, 129.1, 128.7, 128.5, 126.8, 126.3, 117.2, 116.9, 60.0, 42.8, 42.2, 34.2,

32.9, 24.9, 24.7; HRMS (ESI-TOF)  $m/z$ :  $C_{22}H_{23}NNaO_2S_2^+$  ( $M + Na$ ) $^+$  calcd for 420.1062, found 420.1067.

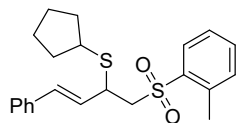

(*E*)-cyclopentyl(4-phenyl-1-(*o*-tolylsulfonyl)but-3-en-2-yl)sulfane (**4x**), by silica gel column chromatography (hexane/ethyl acetate = 15:1), 44.8 mg, 58% yield, Yellow oil,  $^1H$  NMR (400 MHz,  $CDCl_3$ )  $\delta$ : 7.90 (dd,  $J = 7.9, 1.0$  Hz, 1H), 7.37 (td,  $J = 7.5, 1.2$  Hz, 1H), 7.29-7.24 (m, 4H), 7.21 – 7.13 (m, 3H), 6.28 (d,  $J = 15.6$  Hz, 1H), 5.71 (dd,  $J = 15.6, 9.5$  Hz, 1H), 3.92 (dt,  $J = 9.2, 7.1$  Hz, 1H), 3.60 – 3.44 (m, 2H), 3.09 – 2.93 (m, 1H), 2.69 (s, 3H), 2.00 – 1.84 (m, 2H), 1.73-1.66 (m, 2H), 1.57-1.48 (m, 3H), 1.46-1.39 (m, 1H);  $^{13}C\{^1H\}$  NMR (100 MHz,  $CDCl_3$ )  $\delta$ : 137.7, 137.6, 136.0, 133.6, 132.5, 132.0, 130.6, 128.4, 127.8, 127.1, 126.5 (2C), 59.3, 42.8, 42.2, 34.2, 33.0, 25.0, 24.7, 20.4; HRMS (ESI-TOF)  $m/z$ :  $C_{22}H_{26}NaO_2S_2^+$  ( $M + Na$ ) $^+$  calcd for 409.1266, found 409.1274.

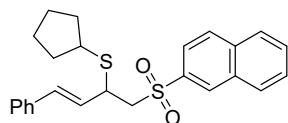

(*E*)-cyclopentyl(1-(naphthalen-2-ylsulfonyl)-4-phenylbut-3-en-2-yl)sulfane (**4y**), by silica gel column chromatography (hexane/ethyl acetate = 15:1), 46.4 mg, 55% yield, Yellow solid (mp 77-79 °C),  $^1H$  NMR (400 MHz,  $CDCl_3$ )  $\delta$ : 8.39 (s, 1H), 7.88 (d,  $J = 8.6$  Hz, 1H), 7.84 – 7.78 (m, 2H), 7.74 (d,  $J = 8.2$  Hz, 1H), 7.60 (t,  $J = 7.6$  Hz, 1H), 7.51 (t,  $J = 7.5$  Hz, 1H), 7.18 – 7.09 (m, 3H), 7.01 (dd,  $J = 7.1, 2.0$  Hz, 2H), 6.31 (d,  $J = 15.7$  Hz, 1H), 5.63 (dd,  $J = 15.6, 9.6$  Hz, 1H), 3.96 (td,  $J = 9.2, 5.3$  Hz, 1H), 3.63 – 3.45 (m, 2H), 3.02-2.95 (m, 1H), 2.00 – 1.83 (m, 2H), 1.75 – 1.63 (m, 2H), 1.58-1.46 (m, 3H), 1.44 – 1.37 (m, 1H);  $^{13}C\{^1H\}$  NMR (100 MHz,  $CDCl_3$ )  $\delta$ : 136.3, 135.7, 135.2, 132.0, 132.0, 130.6, 129.4, 129.3, 129.2, 128.3, 127.8, 127.7, 127.5, 127.1, 126.3, 122.7, 60.1, 42.7, 42.4, 34.2, 33.0, 24.9, 24.7; HRMS (ESI-TOF)  $m/z$ :  $C_{25}H_{26}NaO_2S_2^+$  ( $M + Na$ ) $^+$  calcd for 445.1266, found 445.1267.

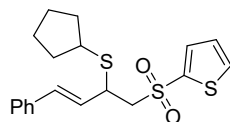

(*E*)-2-((2-(cyclopentylthio)-4-phenylbut-3-en-1-yl)sulfonyl)thiophene (**4z**), by silica

gel column chromatography (hexane/ethyl acetate = 15:1), 40.1 mg, 53% yield, Yellow solid (mp 61-63 °C), <sup>1</sup>H NMR (400 MHz, CDCl<sub>3</sub>) δ: 7.64-7.60 (m, 2H), 7.34 – 7.22 (m, 5H), 7.01 (dd, *J* = 4.8, 3.9 Hz, 1H), 6.40 (d, *J* = 15.7 Hz, 1H), 5.83 (dd, *J* = 15.6, 9.5 Hz, 1H), 3.97 (td, *J* = 8.6, 5.9 Hz, 1H), 3.66 – 3.47 (m, 2H), 3.03 (p, *J* = 7.1 Hz, 1H), 2.04 – 1.86 (m, 2H), 1.78 – 1.66 (m, 2H), 1.60 – 1.49 (m, 3H), 1.48-1.39 (m, 1H); <sup>13</sup>C{<sup>1</sup>H} NMR (100 MHz, CDCl<sub>3</sub>) δ: 140.6, 136.0, 134.7, 134.2, 132.0, 128.5, 127.9, 127.8, 127.0, 126.5, 61.7, 42.7, 42.3, 34.2, 33.0, 25.0, 24.7; HRMS (ESI-TOF) *m/z*: C<sub>19</sub>H<sub>22</sub>NaO<sub>2</sub>S<sub>3</sub><sup>+</sup> (M + Na)<sup>+</sup> calcd for 401.0674, found 401.0679.

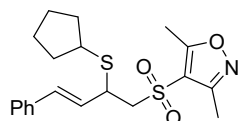

(*E*)-4-((2-(cyclopentylthio)-4-phenylbut-3-en-1-yl)sulfonyl)-3,5-dimethylisoxazole (**4za**), by silica gel column chromatography (hexane/ethyl acetate = 15:1), 48.5 mg, 62% yield, Yellow solid (mp 60-62 °C), <sup>1</sup>H NMR (400 MHz, CDCl<sub>3</sub>) δ: 7.35 – 7.30 (m, 2H), 7.27 (d, *J* = 7.6 Hz, 3H), 6.42 (d, *J* = 15.6 Hz, 1H), 5.84 (dd, *J* = 15.6, 9.6 Hz, 1H), 3.95 (dd, *J* = 14.7, 8.8 Hz, 1H), 3.51 – 3.36 (m, 2H), 3.06-2.99 (m, 1H), 2.54 (s, 3H), 2.44 (s, 3H), 2.04 – 1.87 (m, 2H), 1.77 – 1.66 (m, 2H), 1.61 – 1.49 (m, 3H), 1.45-1.40 (m, 1H); <sup>13</sup>C{<sup>1</sup>H} NMR (100 MHz, CDCl<sub>3</sub>) δ: 174.9, 157.5, 135.5, 132.1, 128.7, 128.2, 126.7, 126.4, 115.9, 60.8, 42.7, 42.2, 34.3, 32.9, 25.0, 24.7, 12.8, 10.9; HRMS (ESI-TOF) *m/z*: C<sub>20</sub>H<sub>25</sub>NNaO<sub>3</sub>S<sub>2</sub><sup>+</sup> (M + Na)<sup>+</sup> calcd for 414.1168, found 414.1175.

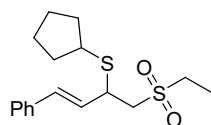

(*E*)-cyclopentyl(1-(ethylsulfonyl)-4-phenylbut-3-en-2-yl)sulfane (**4zb**), by silica gel column chromatography (hexane/ethyl acetate = 12:1), 46.0 mg, 71% yield, Yellow oil, <sup>1</sup>H NMR (400 MHz, CDCl<sub>3</sub>) δ: 7.40 (d, *J* = 7.3 Hz, 2H), 7.34 (t, *J* = 7.4 Hz, 2H), 7.27 (dd, *J* = 8.7, 5.4 Hz, 1H), 6.56 (d, *J* = 15.7 Hz, 1H), 6.05 (dd, *J* = 15.7, 9.6 Hz, 1H), 4.03 (dd, *J* = 16.3, 7.1 Hz, 1H), 3.37 – 3.19 (m, 2H), 3.12-3.04 (m, 3H), 2.08 – 1.91 (m, 2H), 1.80 – 1.68 (m, 2H), 1.66 – 1.45 (m, 4H), 1.37 (t, *J* = 7.5 Hz, 3H); <sup>13</sup>C{<sup>1</sup>H} NMR (100 MHz, CDCl<sub>3</sub>) δ: 135.8, 132.2, 128.7, 128.1, 127.6, 126.5, 56.2, 49.1, 43.0, 42.2, 34.2, 33.0, 24.9, 24.7, 6.5; HRMS (ESI-TOF) *m/z*: C<sub>17</sub>H<sub>24</sub>NaO<sub>2</sub>S<sub>2</sub><sup>+</sup>

(M + Na)<sup>+</sup> calcd for 347.1110, found 347.1117.

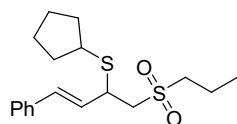

(*E*)-cyclopentyl(4-phenyl-1-(propylsulfonyl)but-3-en-2-yl)sulfane (**4zc**), by silica gel column chromatography (hexane/ethyl acetate = 15:1), 42.6 mg, 63% yield, Yellow oil, <sup>1</sup>H NMR (400 MHz, CDCl<sub>3</sub>) δ: 7.39 (d, *J* = 7.2 Hz, 2H), 7.33 (t, *J* = 7.5 Hz, 2H), 7.27 (t, *J* = 6.9 Hz, 1H), 6.56 (d, *J* = 15.7 Hz, 1H), 6.05 (dd, *J* = 15.7, 9.6 Hz, 1H), 4.09 – 3.96 (m, 1H), 3.37 – 3.22 (m, 2H), 3.07 (dd, *J* = 13.9, 6.9 Hz, 1H), 3.02 (dd, *J* = 10.0, 5.8 Hz, 2H), 2.13 – 1.91 (m, 2H), 1.91 – 1.79 (m, 2H), 1.79 – 1.67 (m, 2H), 1.67 – 1.44 (m, 4H), 1.01 (t, *J* = 7.3 Hz, 3H); <sup>13</sup>C{<sup>1</sup>H} NMR (100 MHz, CDCl<sub>3</sub>) δ: 135.8, 132.2, 128.7, 128.1, 127.7, 126.5, 57.0, 56.4, 43.0, 42.1, 34.3, 33.0, 24.9, 24.7, 15.8, 13.1; HRMS (ESI-TOF) *m/z*: C<sub>18</sub>H<sub>26</sub>NaO<sub>2</sub>S<sub>2</sub><sup>+</sup> (M + Na)<sup>+</sup> calcd for 361.1266, found 361.1269.

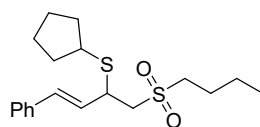

(*E*)-(1-(butylsulfonyl)-4-phenylbut-3-en-2-yl)(cyclopentyl)sulfane (**4zd**), by silica gel column chromatography (hexane/ethyl acetate = 15:1), 36.6 mg, 52% yield, Yellow oil, <sup>1</sup>H NMR (400 MHz, CDCl<sub>3</sub>) δ: 7.39 (d, *J* = 7.2 Hz, 2H), 7.33 (t, *J* = 7.4 Hz, 2H), 7.27 (dd, *J* = 7.9, 6.4 Hz, 1H), 6.56 (d, *J* = 15.7 Hz, 1H), 6.05 (dd, *J* = 15.7, 9.6 Hz, 1H), 4.09 – 3.93 (m, 1H), 3.35 – 3.22 (m, 2H), 3.15 – 2.96 (m, 3H), 2.09 – 1.91 (m, 2H), 1.84 – 1.69 (m, 4H), 1.66 – 1.54 (m, 3H), 1.53 – 1.46 (m, 1H), 1.43 – 1.36 (m, 2H), 0.88 (t, *J* = 7.3 Hz, 3H); <sup>13</sup>C{<sup>1</sup>H} NMR (100 MHz, CDCl<sub>3</sub>) δ: 135.8, 132.2, 128.7, 128.1, 127.7, 126.5, 57.0, 54.5, 43.0, 42.1, 34.3, 33.0, 25.0, 24.7, 23.9, 21.6, 13.4; HRMS (ESI-TOF) *m/z*: C<sub>19</sub>H<sub>28</sub>NaO<sub>2</sub>S<sub>2</sub><sup>+</sup> (M + Na)<sup>+</sup> calcd for 375.1423, found 375.1429.

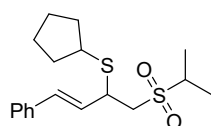

(*E*)-cyclopentyl(1-(isopropylsulfonyl)-4-phenylbut-3-en-2-yl)sulfane (**4ze**), by silica gel column chromatography (hexane/ethyl acetate = 12:1), 44.0 mg, 65% yield, Yellow oil, <sup>1</sup>H NMR (400 MHz, CDCl<sub>3</sub>) δ: 7.40 (d, *J* = 7.3 Hz, 2H), 7.33 (t, *J* = 7.4

Hz, 2H), 7.26 (t,  $J = 7.2$  Hz, 1H), 6.56 (d,  $J = 15.7$  Hz, 1H), 6.08 (dd,  $J = 15.6, 9.6$  Hz, 1H), 4.05 (td,  $J = 8.9, 5.5$  Hz, 1H), 3.36 – 3.16 (m, 3H), 3.14 – 3.02 (m, 1H), 2.08 – 1.91 (m, 2H), 1.81 – 1.68 (m, 2H), 1.66 – 1.45 (m, 4H), 1.37 (d,  $J = 6.8$  Hz, 6H);  $^{13}\text{C}\{^1\text{H}\}$  NMR (100 MHz,  $\text{CDCl}_3$ )  $\delta$ : 135.9, 132.0, 128.6, 128.0, 127.7, 126.5, 54.1, 53.7, 43.0, 41.7, 34.3, 33.0, 25.0, 24.7, 15.2, 15.0; HRMS (ESI-TOF)  $m/z$ :  $\text{C}_{18}\text{H}_{26}\text{NaO}_2\text{S}_2^+$  ( $\text{M} + \text{Na}$ ) $^+$  calcd for 361.1266, found 361.1275.

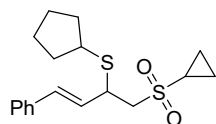

(*E*)-cyclopentyl(1-(cyclopropylsulfonyl)-4-phenylbut-3-en-2-yl)sulfane (**4zf**), by silica gel column chromatography (hexane/ethyl acetate = 12:1), 40.3 mg, 60% yield, Yellow oil,  $^1\text{H}$  NMR (400 MHz,  $\text{CDCl}_3$ )  $\delta$ : 7.40 (d,  $J = 7.6$  Hz, 2H), 7.33 (t,  $J = 7.4$  Hz, 2H), 7.26 (t,  $J = 7.1$  Hz, 1H), 6.56 (d,  $J = 15.7$  Hz, 1H), 6.10 (dd,  $J = 15.7, 9.6$  Hz, 1H), 4.07 (dd,  $J = 16.4, 7.1$  Hz, 1H), 3.37 (d,  $J = 7.0$  Hz, 2H), 3.12-3.05 (m, 1H), 2.52 – 2.42 (m, 1H), 2.07-1.93 (m, 2H), 1.80 – 1.70 (m, 2H), 1.65 – 1.46 (m, 4H), 1.27 – 1.19 (m, 2H), 1.02 – 0.96 (m, 2H);  $^{13}\text{C}\{^1\text{H}\}$  NMR (100 MHz,  $\text{CDCl}_3$ )  $\delta$ : 135.9, 131.9, 128.7, 128.0, 127.9, 126.5, 58.4, 42.9, 42.2, 34.3, 33.0, 31.2, 25.0, 24.7, 5.4, 5.2; HRMS (ESI-TOF)  $m/z$ :  $\text{C}_{18}\text{H}_{24}\text{NaO}_2\text{S}_2^+$  ( $\text{M} + \text{Na}$ ) $^+$  calcd for 359.1110, found 359.1117.

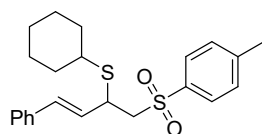

(*E*)-octyl(4-phenyl-1-tosylbut-3-en-2-yl)sulfane (**4zg**), by silica gel column chromatography (hexane/ethyl acetate = 15:1), 48.8 mg, 61% yield, Yellow solid (mp 55-57 °C),  $^1\text{H}$  NMR (400 MHz,  $\text{CDCl}_3$ )  $\delta$ : 7.70 (d,  $J = 8.1$  Hz, 2H), 7.30 – 7.21 (m, 3H), 7.16 (t,  $J = 7.8$  Hz, 4H), 6.28 (d,  $J = 15.7$  Hz, 1H), 5.62 (dd,  $J = 15.7, 9.5$  Hz, 1H), 3.97 (dd,  $J = 16.2, 7.3$  Hz, 1H), 3.51 – 3.37 (m, 2H), 2.59 (td,  $J = 10.2, 3.6$  Hz, 1H), 2.27 (s, 3H), 1.95 (d,  $J = 13.1$  Hz, 1H), 1.81 – 1.71 (m, 2H), 1.67-1.66 (m, 1H), 1.56-1.53 (m, 1H), 1.34 – 1.20 (m, 5H);  $^{13}\text{C}\{^1\text{H}\}$  NMR (100 MHz,  $\text{CDCl}_3$ )  $\delta$ : 144.7, 136.5, 136.0, 131.8, 129.7, 128.4, 128.3, 127.8, 127.4, 126.4, 60.4, 42.7, 40.5, 33.6, 33.0, 25.9, 25.6 (2C), 21.4; HRMS (ESI-TOF)  $m/z$ :  $\text{C}_{23}\text{H}_{28}\text{NaO}_2\text{S}_2^+$  ( $\text{M} + \text{Na}$ ) $^+$  calcd

for 423.1423, found 423.1425.

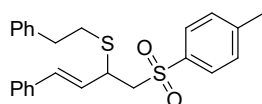

(*E*)-phenethyl(4-phenyl-1-tosylbut-3-en-2-yl)sulfane (**4zh**), by silica gel column chromatography (hexane/ethyl acetate = 10:1), 40.5 mg, 48% yield, Yellow oil, <sup>1</sup>H NMR (400 MHz, CDCl<sub>3</sub>) δ: 7.69 (d, *J* = 8.0 Hz, 2H), 7.31 – 7.22 (m, 5H), 7.18 (dd, *J* = 15.6, 7.9 Hz, 5H), 7.11 (d, *J* = 7.4 Hz, 2H), 6.23 (d, *J* = 15.7 Hz, 1H), 5.60 (dd, *J* = 15.7, 9.6 Hz, 1H), 3.84 (dd, *J* = 14.8, 8.6 Hz, 1H), 3.51 – 3.35 (m, 2H), 2.82 (dd, *J* = 13.9, 6.4 Hz, 2H), 2.77 – 2.61 (m, 2H), 2.28 (s, 3H); <sup>13</sup>C{<sup>1</sup>H} NMR (100 MHz, CDCl<sub>3</sub>) δ: 144.8, 139.9, 136.3, 135.6, 132.4, 129.7, 128.5 (3C), 128.4, 128.3, 127.9, 126.6, 126.4, 60.0, 42.1, 35.9, 32.2, 21.5; HRMS (ESI-TOF) *m/z*: C<sub>25</sub>H<sub>26</sub>NaO<sub>2</sub>S<sub>2</sub><sup>+</sup> (M + Na)<sup>+</sup> calcd for 445.1266, found 445.1270.

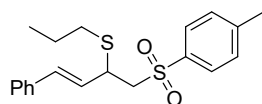

(*E*)-(4-phenyl-1-tosylbut-3-en-2-yl)(propyl)sulfane (**4zi**), by silica gel column chromatography (hexane/ethyl acetate = 15:1), 51.9 mg, 72% yield, Yellow oil, <sup>1</sup>H NMR (400 MHz, CDCl<sub>3</sub>) δ: 7.71 (d, *J* = 8.0 Hz, 2H), 7.31 – 7.21 (m, 3H), 7.18 (t, *J* = 7.6 Hz, 4H), 6.26 (d, *J* = 15.7 Hz, 1H), 5.60 (dd, *J* = 15.6, 9.5 Hz, 1H), 3.84 (td, *J* = 9.0, 5.4 Hz, 1H), 3.53 – 3.37 (m, 2H), 2.52 – 2.42 (m, 1H), 2.42 – 2.32 (m, 1H), 2.28 (s, 3H), 1.62 – 1.48 (m, 2H), 0.93 (t, *J* = 7.3 Hz, 3H); <sup>13</sup>C{<sup>1</sup>H} NMR (100 MHz, CDCl<sub>3</sub>) δ: 144.8, 136.4, 135.9, 132.2, 129.7, 128.4, 128.3, 127.8, 126.9, 126.4, 60.2, 41.9, 32.7, 22.5, 21.5, 13.4; HRMS (ESI-TOF) *m/z*: C<sub>20</sub>H<sub>24</sub>NaO<sub>2</sub>S<sub>2</sub><sup>+</sup> (M + Na)<sup>+</sup> calcd for 383.1110, found 383.1123.

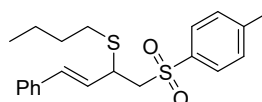

(*E*)-butyl(4-phenyl-1-tosylbut-3-en-2-yl)sulfane (**4zj**), by silica gel column chromatography (hexane/ethyl acetate = 15:1), 50.9 mg, 68% yield, Yellow oil, <sup>1</sup>H NMR (400 MHz, CDCl<sub>3</sub>) δ: 7.71 (d, *J* = 8.0 Hz, 2H), 7.30 – 7.22 (m, 3H), 7.18 (t, *J* = 8.3 Hz, 4H), 6.27 (d, *J* = 15.7 Hz, 1H), 5.61 (dd, *J* = 15.6, 9.5 Hz, 1H), 3.84 (dd, *J* = 14.5, 8.9 Hz, 1H), 3.55 – 3.37 (m, 2H), 2.52-2.36 (m, 2H), 2.29 (s, 3H), 1.56 – 1.46

(m, 2H), 1.37 – 1.30 (m, 2H), 0.87 (t,  $J = 7.3$  Hz, 3H);  $^{13}\text{C}\{^1\text{H}\}$  NMR (100 MHz,  $\text{CDCl}_3$ )  $\delta$ : 144.8, 136.5, 135.9, 132.2, 129.7, 128.4, 128.4, 127.8, 126.9, 126.4, 60.2, 41.9, 31.2, 30.4, 21.9, 21.5, 13.6; HRMS (ESI-TOF)  $m/z$ :  $\text{C}_{21}\text{H}_{26}\text{NaO}_2\text{S}_2^+$  ( $\text{M} + \text{Na}$ ) $^+$  calcd for 397.1266, found 397.1268.

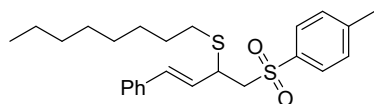

(*E*)-octyl(4-phenyl-1-tosylbut-3-en-2-yl)sulfane (**4zk**), by silica gel column chromatography (hexane/ethyl acetate = 20:1), 60.2 mg, 70% yield, Yellow oil,  $^1\text{H}$  NMR (400 MHz,  $\text{CDCl}_3$ )  $\delta$ : 7.71 (d,  $J = 8.2$  Hz, 2H), 7.24 (dd,  $J = 14.4, 7.1$  Hz, 3H), 7.17 (t,  $J = 7.6$  Hz, 4H), 6.26 (d,  $J = 15.7$  Hz, 1H), 5.60 (dd,  $J = 15.7, 9.5$  Hz, 1H), 3.94 – 3.77 (m, 1H), 3.52 – 3.38 (m, 2H), 2.51 – 2.35 (m, 2H), 2.28 (s, 3H), 1.57 – 1.44 (m, 2H), 1.33 – 1.20 (m, 10H), 0.86 (t,  $J = 6.8$  Hz, 3H);  $^{13}\text{C}\{^1\text{H}\}$  NMR (100 MHz,  $\text{CDCl}_3$ )  $\delta$ : 136.4, 135.9, 132.1, 129.7, 128.4, 128.3, 127.8, 126.8, 126.4, 60.1, 41.9, 31.7, 30.7, 29.1 (3C), 28.8, 22.6, 21.4, 14.0; HRMS (ESI-TOF)  $m/z$ :  $\text{C}_{25}\text{H}_{34}\text{NaO}_2\text{S}_2^+$  ( $\text{M} + \text{Na}$ ) $^+$  calcd for 453.1892, found 453.1898.

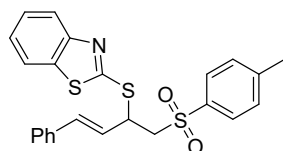

(*E*)-2-((4-phenyl-1-tosylbut-3-en-2-yl)thio)benzo[d]thiazole (**4zl**), by silica gel column chromatography (hexane/ethyl acetate = 9:1), 70.4 mg, 78% yield, Yellow solid (mp 133-135 °C),  $^1\text{H}$  NMR (400 MHz,  $\text{CDCl}_3$ )  $\delta$ : 7.85 (d,  $J = 8.1$  Hz, 1H), 7.75 (dd,  $J = 15.8, 8.0$  Hz, 3H), 7.44 (t,  $J = 7.7$  Hz, 1H), 7.32 (d,  $J = 7.8$  Hz, 1H), 7.29 – 7.18 (m, 7H), 6.64 (d,  $J = 15.7$  Hz, 1H), 6.09 (dd,  $J = 15.7, 9.0$  Hz, 1H), 4.94 (td,  $J = 10.0, 3.5$  Hz, 1H), 4.09 (dd,  $J = 14.3, 3.5$  Hz, 1H), 3.83 (dd,  $J = 14.3, 10.5$  Hz, 1H), 2.33 (s, 3H);  $^{13}\text{C}\{^1\text{H}\}$  NMR (100 MHz,  $\text{CDCl}_3$ )  $\delta$ : 163.0, 152.9, 144.9, 136.3, 135.6, 135.4, 135.0, 129.8, 128.4 (2C), 128.2, 126.7, 126.1, 124.7, 124.1, 121.9, 121.0, 60.0, 45.1, 21.5; HRMS (ESI-TOF)  $m/z$ :  $\text{C}_{24}\text{H}_{21}\text{NNaO}_2\text{S}_3^+$  ( $\text{M} + \text{Na}$ ) $^+$  calcd for 474.0627, found 474.0629.

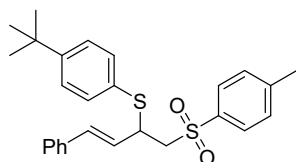

(*E*)-4-(4-(tert-butyl)phenyl)(4-phenyl-1-tosylbut-3-en-2-yl)sulfane (**4zm**), by silica gel column chromatography (hexane/ethyl acetate = 10:1), 27.9 mg, 31% yield, Yellow solid (mp 115-117 °C), <sup>1</sup>H NMR (400 MHz, CDCl<sub>3</sub>) δ: 7.67 (d, *J* = 8.0 Hz, 2H), 7.29 (s, 4H), 7.27 – 7.22 (m, 3H), 7.18 (d, *J* = 7.9 Hz, 2H), 7.04 (d, *J* = 7.2 Hz, 2H), 6.12 (d, *J* = 15.7 Hz, 1H), 5.65 (dd, *J* = 15.7, 9.2 Hz, 1H), 4.13 (td, *J* = 9.7, 3.9 Hz, 1H), 3.59 – 3.40 (m, 2H), 2.29 (s, 3H), 1.30 (s, 9H); <sup>13</sup>C{<sup>1</sup>H} NMR (100 MHz, CDCl<sub>3</sub>) δ: 152.0, 144.8, 136.3, 136.0, 134.3, 133.3, 129.7, 128.4, 128.3, 128.1, 127.8, 126.4, 126.2, 125.7, 60.1, 45.9, 34.6, 31.2, 21.5; HRMS (ESI-TOF) *m/z*: C<sub>27</sub>H<sub>30</sub>NaO<sub>2</sub>S<sub>2</sub><sup>+</sup> (M + Na)<sup>+</sup> calcd for 473.1579, found 473.1588.

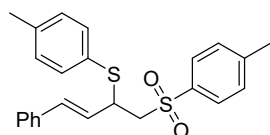

(*E*)-4-phenyl-1-tosylbut-3-en-2-yl(*p*-tolyl)sulfane (**4zn**), by silica gel column chromatography (hexane/ethyl acetate = 10:1), 20.4 mg, 25% yield, Yellow solid (mp 99-101 °C), <sup>1</sup>H NMR (400 MHz, CDCl<sub>3</sub>) δ: 7.66 (d, *J* = 7.8 Hz, 2H), 7.30 – 7.20 (m, 6H), 7.17 (d, *J* = 8.0 Hz, 2H), 7.08 (t, *J* = 8.7 Hz, 4H), 6.14 (d, *J* = 15.7 Hz, 1H), 5.65 (dd, *J* = 15.7, 9.2 Hz, 1H), 4.10 (td, *J* = 9.8, 3.7 Hz, 1H), 3.58 – 3.38 (m, 2H), 2.33 (s, 3H), 2.28 (s, 3H); <sup>13</sup>C{<sup>1</sup>H} NMR (100 MHz, CDCl<sub>3</sub>) δ: 144.8, 138.9, 136.2, 136.0, 135.8, 134.7, 133.2, 129.9, 129.7, 128.4, 128.3, 128.0, 127.8, 126.4, 125.9, 60.1, 46.0, 21.5, 21.2; HRMS (ESI-TOF) *m/z*: C<sub>24</sub>H<sub>24</sub>NaO<sub>2</sub>S<sub>2</sub><sup>+</sup> (M + Na)<sup>+</sup> calcd for 431.1110, found 431.1115.

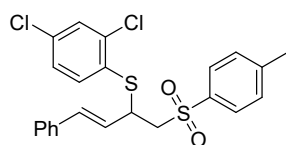

(*E*)-2,4-dichlorophenyl(4-phenyl-1-tosylbut-3-en-2-yl)sulfane (**4zo**), by silica gel column chromatography (hexane/ethyl acetate = 12:1), 18.5 mg, 20% yield, Yellow solid (mp 85-87 °C), <sup>1</sup>H NMR (400 MHz, CDCl<sub>3</sub>) δ: 7.68 (d, *J* = 7.9 Hz, 2H), 7.40 (s, 1H), 7.35 (d, *J* = 8.4 Hz, 2H), 7.26 – 7.17 (m, 5H), 7.06 (d, *J* = 7.0 Hz, 2H), 6.17 (d, *J*

= 15.7 Hz, 1H), 5.69 (dd,  $J = 15.7, 9.2$  Hz, 1H), 4.31 (td,  $J = 9.8, 3.2$  Hz, 1H), 3.59 – 3.36 (m, 2H), 2.29 (s, 3H);  $^{13}\text{C}\{^1\text{H}\}$  NMR (100 MHz,  $\text{CDCl}_3$ )  $\delta$ : 145.1, 138.8, 136.3, 136.1, 135.7, 135.2, 133.9, 130.1, 130.0, 129.9, 128.5, 128.4, 128.1, 127.7, 126.5, 125.1, 59.8, 45.2, 21.6; HRMS (ESI-TOF)  $m/z$ :  $\text{C}_{23}\text{H}_{20}\text{Cl}_2\text{NaO}_2\text{S}_2^+$  ( $\text{M} + \text{Na}$ ) $^+$  calcd for 485.0174, found 485.0178.

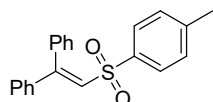

(2-tosylethene-1,1-diyl)dibenzene (**5**), by silica gel column chromatography (hexane/ethyl acetate = 20:1), 25.4 mg, 38% yield, Yellow solid (mp 103-105 °C),  $^1\text{H}$  NMR (400 MHz,  $\text{CDCl}_3$ )  $\delta$ : 7.47 (d,  $J = 8.1$  Hz, 2H), 7.40 – 7.33 (m, 2H), 7.29 (t,  $J = 7.1$  Hz, 4H), 7.20 (d,  $J = 7.4$  Hz, 2H), 7.14 (d,  $J = 8.0$  Hz, 2H), 7.09 (d,  $J = 7.2$  Hz, 2H), 7.00 (s, 1H), 2.37 (s, 3H);  $^{13}\text{C}\{^1\text{H}\}$  NMR (100 MHz,  $\text{CDCl}_3$ )  $\delta$ : 154.6, 143.7, 139.1, 138.4, 135.5, 130.2, 129.7, 129.2, 128.8 (2C), 128.5, 128.1, 127.7, 127.6, 21.5; HRMS (ESI-TOF)  $m/z$ :  $\text{C}_{21}\text{H}_{18}\text{NaO}_2\text{S}^+$  ( $\text{M} + \text{Na}$ ) $^+$  calcd for 357.0920, found 357.0931.

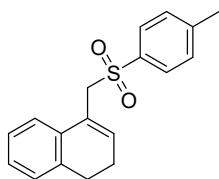

4-(tosylmethyl)-1,2-dihydronaphthalene (**7**), by silica gel column chromatography (hexane/ethyl acetate = 10:1), 13.7 mg, 23% yield, Yellow solid (mp 93-95 °C),  $^1\text{H}$  NMR (400 MHz,  $\text{CDCl}_3$ )  $\delta$ : 7.61 (d,  $J = 8.2$  Hz, 2H), 7.18 (t,  $J = 5.2$  Hz, 6H), 6.04 (t,  $J = 7.3$  Hz, 1H), 4.35 (s, 2H), 3.57 (t,  $J = 6.6$  Hz, 2H), 2.66-2.61 (m, 2H), 2.37 (s, 3H);  $^{13}\text{C}\{^1\text{H}\}$  NMR (100 MHz,  $\text{CDCl}_3$ )  $\delta$ : 144.7, 140.5, 135.9, 133.6, 130.7, 129.5, 128.4 (2C), 128.3, 127.4, 126.5 (2C), 58.0, 43.6, 32.5, 21.5; HRMS (ESI-TOF)  $m/z$ :  $\text{C}_{18}\text{H}_{18}\text{NaO}_2\text{S}^+$  ( $\text{M} + \text{Na}$ ) $^+$  calcd for 321.0920, found 321.0927.

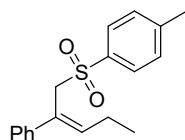

1-methyl-4-((2-phenylpent-2-en-1-yl)sulfonyl)benzene (**8**), by silica gel column chromatography (hexane/ethyl acetate = 5:1), 16.8 mg, 28% yield, Yellow solid (mp 71-73 °C),  $^1\text{H}$  NMR (400 MHz,  $\text{CDCl}_3$ )  $\delta$ : 7.61 (d,  $J = 8.2$  Hz, 2H), 7.21 – 7.13 (m,

7H), 5.95 (t,  $J = 7.4$  Hz, 1H), 4.34 (s, 2H), 2.36 (s, 3H), 2.12-2.04 (m, 2H), 0.96 (t,  $J = 7.5$  Hz, 3H);  $^{13}\text{C}\{^1\text{H}\}$  NMR (100 MHz,  $\text{CDCl}_3$ )  $\delta$ : 144.4, 140.9, 140.2, 136.0, 129.4, 128.5, 128.2, 127.3, 126.9, 126.4, 57.7, 22.7, 21.5, 13.6; HRMS (ESI-TOF)  $m/z$ :  $\text{C}_{18}\text{H}_{20}\text{NaO}_2\text{S}^+$  ( $\text{M} + \text{Na}$ ) $^+$  calcd for 323.1076, found 323.1079.

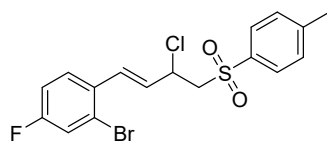

(E)-2-bromo-1-(3-chloro-4-tosylbut-1-en-1-yl)-4-fluorobenzene (**9**), by silica gel column chromatography (hexane/ethyl acetate = 10:1), 34.1 mg, 41% yield, Yellow oil,  $^1\text{H}$  NMR (400 MHz,  $\text{CDCl}_3$ )  $\delta$ : 7.76 (d,  $J = 8.2$  Hz, 2H), 7.34 – 7.26 (m, 4H), 6.97 (td,  $J = 8.4, 2.5$  Hz, 1H), 6.89 (d,  $J = 15.5$  Hz, 1H), 5.93 (dd,  $J = 15.5, 9.0$  Hz, 1H), 4.93 (td,  $J = 8.8, 5.4$  Hz, 1H), 3.77-3.66 (m, 2H), 2.37 (s, 3H);  $^{13}\text{C}\{^1\text{H}\}$  NMR (100 MHz,  $\text{CDCl}_3$ )  $\delta$ : 162.1 (d,  $J = 251.5$  Hz, 1C), 145.2, 135.9, 131.7, 131.4 (d,  $J = 3.6$  Hz, 1C), 129.9, 128.7 (d,  $J = 1.9$  Hz, 1C), 128.4, 128.3 (3C), 123.9 (d,  $J = 9.4$  Hz, 1C), 120.0 (d,  $J = 24.3$  Hz, 1C), 114.9 (d,  $J = 21.3$  Hz, 1C), 62.9, 54.2, 21.5;  $^{19}\text{F}$  NMR (376 MHz,  $\text{CDCl}_3$ )  $\delta$  -110.7 (s, 1F); HRMS (ESI-TOF)  $m/z$ :  $\text{C}_{17}\text{H}_{15}\text{BrClFO}_2\text{S}^+$  ( $\text{M} + \text{Na}$ ) $^+$  calcd for 438.9541, found 438.9555.

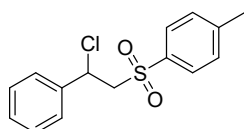

1-((2-chloro-2-phenylethyl)sulfonyl)-4-methylbenzene (**11'**), by silica gel column chromatography (hexane/ethyl acetate = 15:1), 51.8 mg, 88% yield, Yellow oil,  $^1\text{H}$  NMR (400 MHz,  $\text{CDCl}_3$ )  $\delta$ : 7.63 (d,  $J = 8.3$  Hz, 2H), 7.27 (s, 5H), 7.23 (d,  $J = 8.1$  Hz, 2H), 5.33 (t,  $J = 6.9$  Hz, 1H), 3.94 (dd,  $J = 14.8, 6.9$  Hz, 1H), 3.84 (dd,  $J = 14.8, 6.9$  Hz, 1H), 2.40 (s, 3H);  $^{13}\text{C}\{^1\text{H}\}$  NMR (100 MHz,  $\text{CDCl}_3$ )  $\delta$ : 144.9, 138.5, 136.1, 129.7, 129.0, 128.8, 128.1, 127.1, 64.0, 55.1, 21.6; HRMS (ESI-TOF)  $m/z$ :  $\text{C}_{15}\text{H}_{15}\text{ClNaO}_2\text{S}^+$  ( $\text{M} + \text{Na}$ ) $^+$  calcd for 317.0373, found 317.0375.

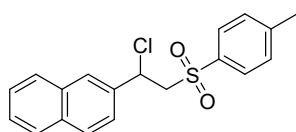

2-(1-chloro-2-tosylethyl)naphthalene (**13'**), by silica gel column chromatography

(hexane/ethyl acetate = 12:1), 46.1 mg, 67% yield, Yellow oil,  $^1\text{H}$  NMR (400 MHz,  $\text{CDCl}_3$ )  $\delta$ : 7.78 – 7.69 (m, 2H), 7.69 – 7.62 (m, 2H), 7.50-7.47 (m, 4H), 7.29 (dd,  $J$  = 8.5, 1.5 Hz, 1H), 6.97 (d,  $J$  = 8.1 Hz, 2H), 5.48 (t,  $J$  = 7.0 Hz, 1H), 4.14 – 3.90 (m, 2H), 2.20 (s, 3H);  $^{13}\text{C}\{^1\text{H}\}$  NMR (100 MHz,  $\text{CDCl}_3$ )  $\delta$ : 144.7, 135.7, 135.1, 133.3, 132.7, 129.4 (2C), 129.0, 128.0, 127.9, 127.5, 126.9, 126.6, 123.9, 63.7, 55.5, 21.3; HRMS (ESI-TOF)  $m/z$ :  $\text{C}_{19}\text{H}_{17}\text{ClNaO}_2\text{S}^+$  ( $\text{M} + \text{Na}$ ) $^+$  calcd for 367.0530, found 367.0535.

## 7. References

- [1] P.-Z. Wang, X. Wu, Y. Cheng, M. Jiang, W.-J. Xiao, J.-R. Chen, *Angew. Chem. Int. Ed.* **2021**, *60*, 22956-22962
- [2] L.-F. Fan, R. Liu, X.-Y. Ruan, P.-S. Wang, L.-Z. Gong, *Nat. Synth.* **2022**, *1*, 946-955.
- [3] A. Lishchynskiy, K. Muñiz, *Chem. Eur. J.* **2012**, *18*, 2212-2216.
- [4] A. Tortajada, O. Ninokata, R. Martin, *J. Am. Chem. Soc.* **2018**, *140*, 2050-2053.
- [5] H. Mo, D. Chen, L. Xu, D. Chen, F. Pan, J. Yang, *Synthesis*, **2015**, *47*, 209-215.

## 8. NMR Spectra

### (*E*)-cyclopentyl(4-phenyl-1-tosylbut-3-en-2-yl)sulfane (**4a**)

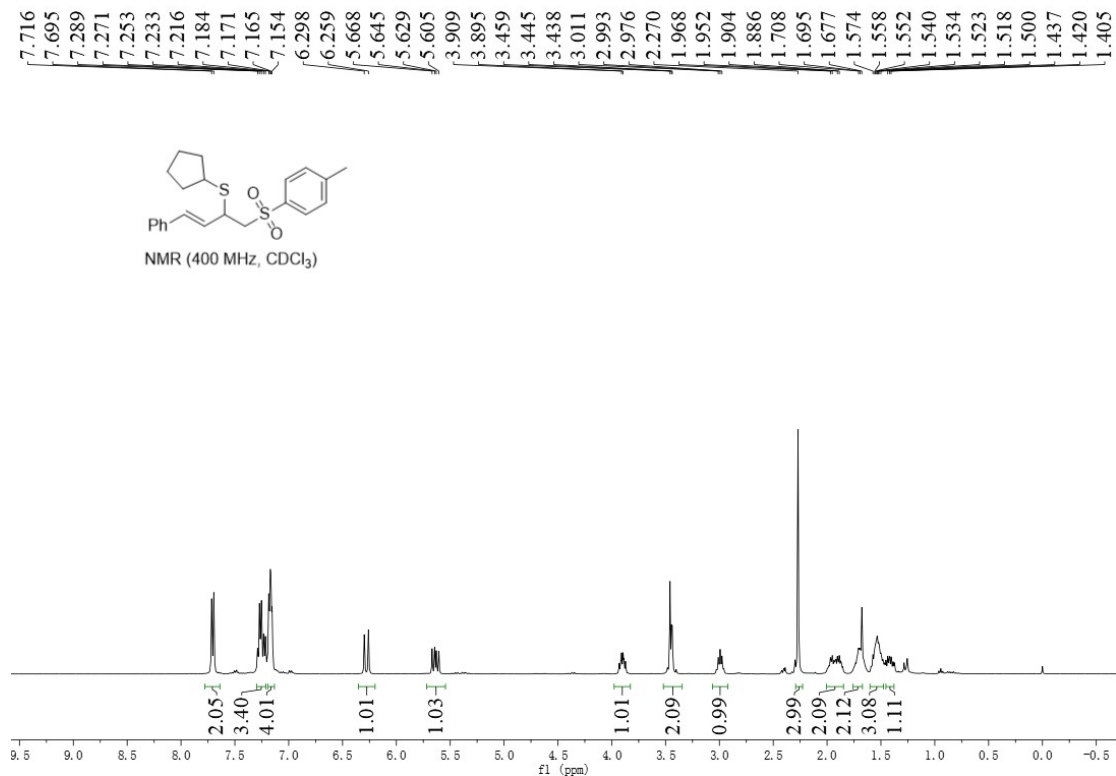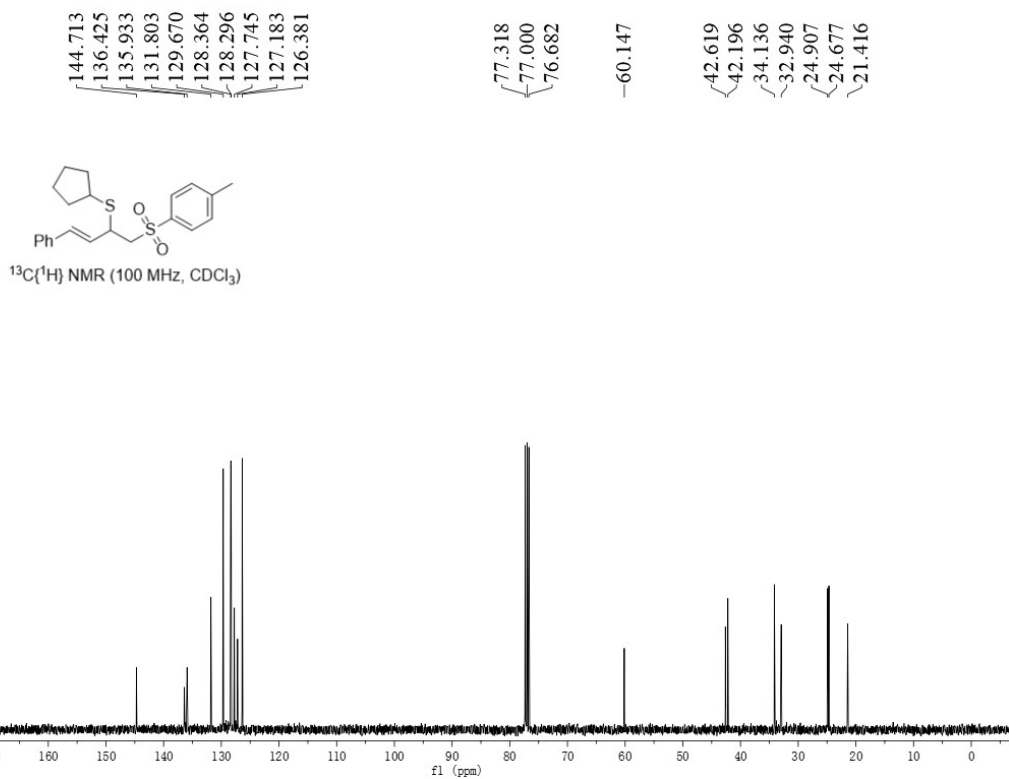

(E)-cyclopentyl(4-(4-methoxyphenyl)-1-tosylbut-3-en-2-yl)sulfane (**4b**)

7.713  
7.693  
7.199  
7.179  
7.114  
7.092  
6.820  
6.799  
6.256  
6.217  
5.515  
5.491  
5.476  
5.452  
3.895  
3.882  
3.809  
3.450  
3.438  
3.427  
3.008  
2.991  
2.974  
2.306  
1.966  
1.949  
1.919  
1.906  
1.888  
1.708  
1.701  
1.694  
1.681  
1.548  
1.538  
1.532  
1.525  
1.515  
1.499  
1.483  
1.438  
1.422  
1.406  
0.000

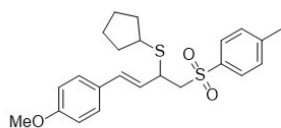

NMR (400 MHz, CDCl<sub>3</sub>)

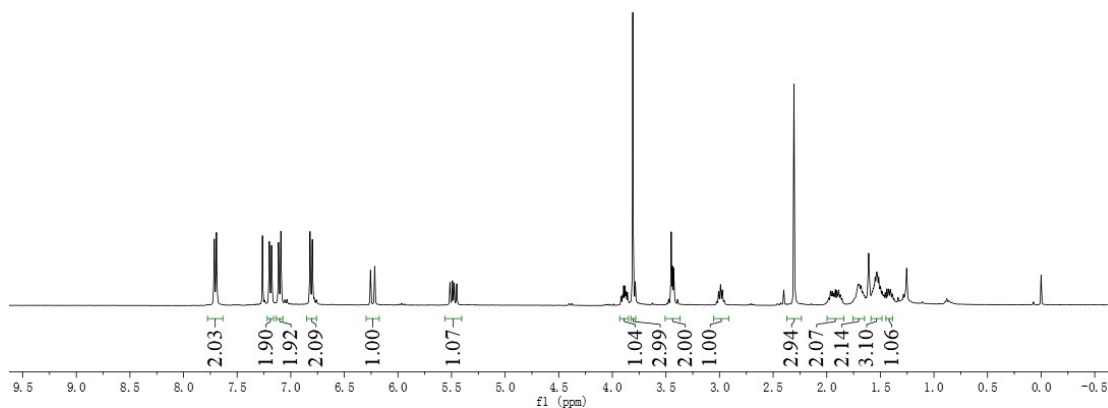

159.333  
144.641  
136.587  
131.407  
129.680  
128.783  
128.368  
127.671  
125.044  
113.805  
77.318  
77.000  
76.683  
60.336  
55.301  
42.647  
42.377  
34.182  
33.006  
24.956  
24.728  
21.506

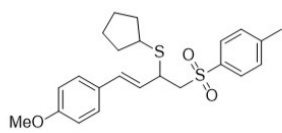

<sup>13</sup>C{<sup>1</sup>H} NMR (100 MHz, CDCl<sub>3</sub>)

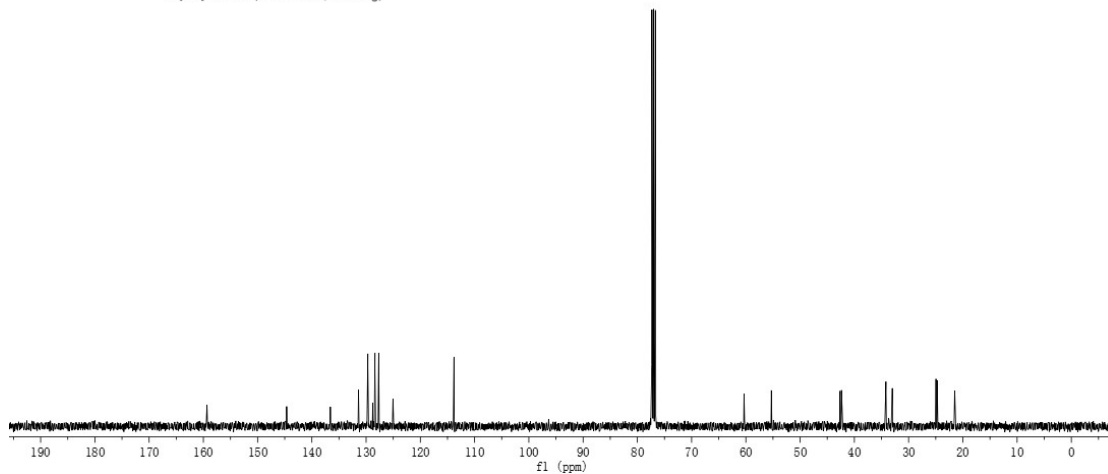

(E)-4-(4-(benzyloxy)phenyl)-1-tosylbut-3-en-2-yl(cyclopentyl)sulfane (**4c**)

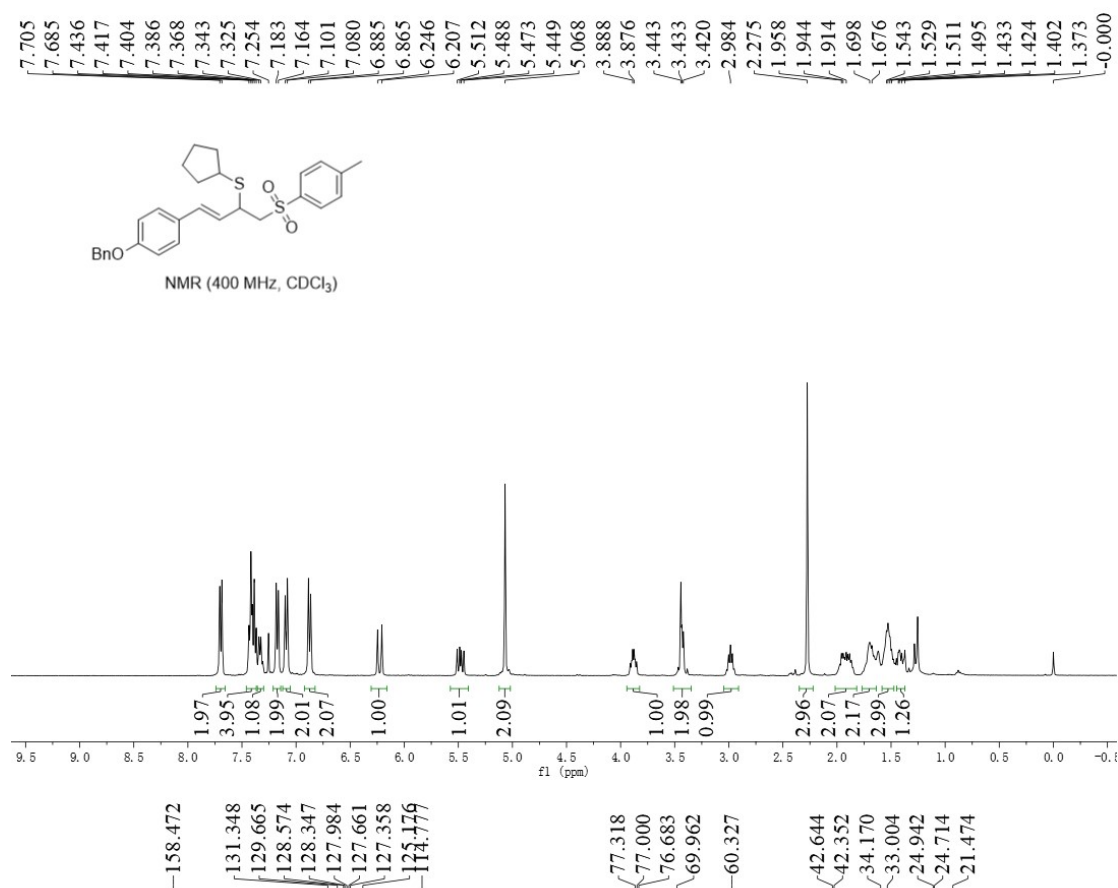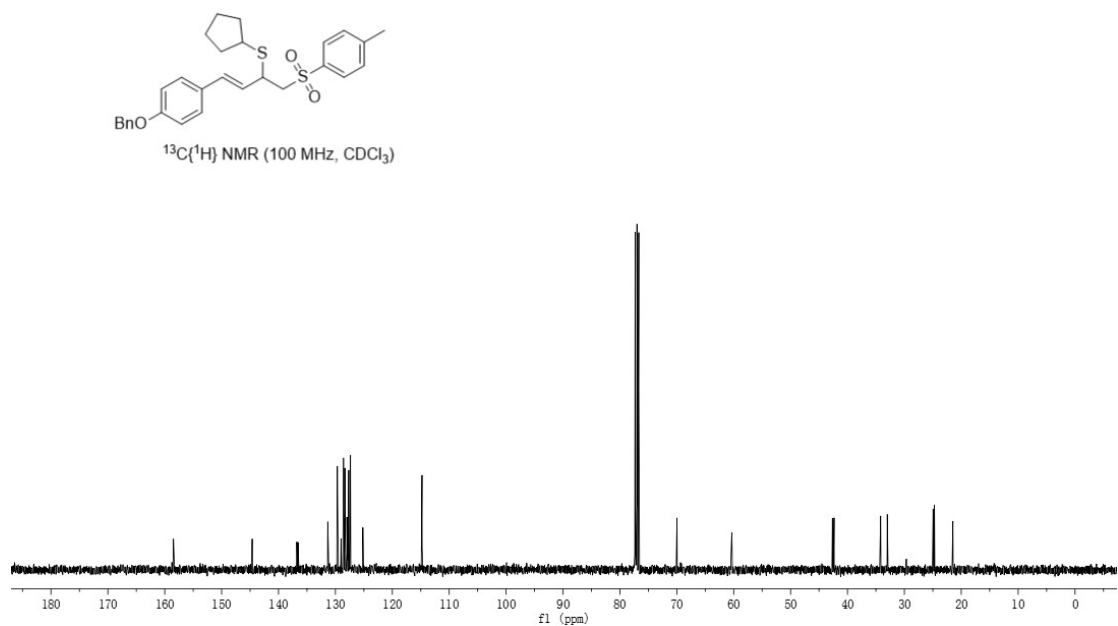

(E)-cyclopentyl(4-(p-tolyl)-1-tosylbut-3-en-2-yl)sulfane (4d)

7.713  
7.693  
7.259  
7.192  
7.172  
7.092  
7.070  
7.066  
7.044  
6.265  
6.226  
5.607  
5.583  
5.568  
5.544  
3.893  
3.879  
3.450  
3.436  
3.428  
3.002  
2.984  
2.967  
2.327  
2.286  
1.944  
1.897  
1.879  
1.711  
1.703  
1.696  
1.689  
1.676  
1.566  
1.550  
1.544  
1.533  
1.526  
1.509  
1.493  
1.430  
1.413  
1.400  
1.373

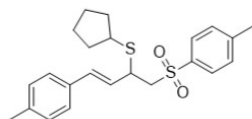

NMR (400 MHz, CDCl<sub>3</sub>)

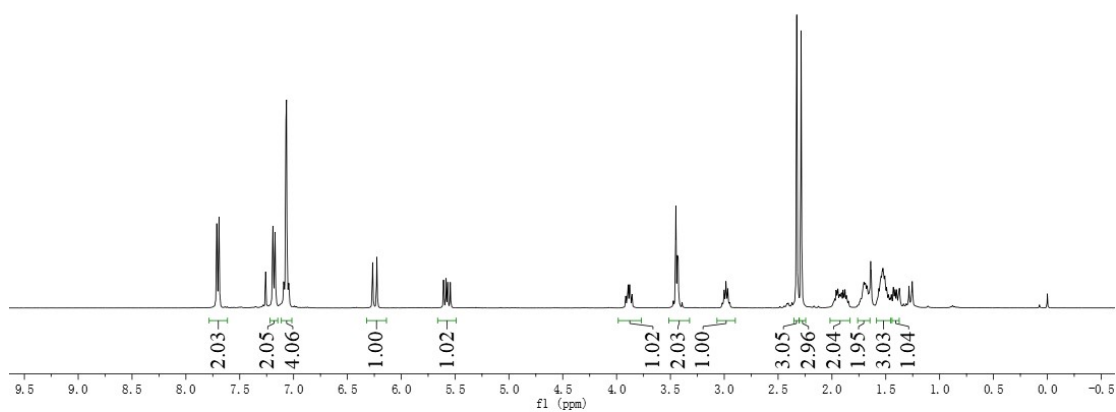

144.641  
137.643  
136.494  
133.181  
131.769  
129.678  
129.064  
128.336  
126.343  
126.183

77.317  
77.000  
76.682  
60.246  
42.625  
42.297  
34.158  
32.968  
24.932  
24.700  
21.439  
21.151

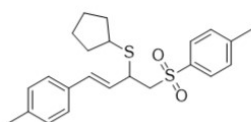

<sup>13</sup>C{<sup>1</sup>H} NMR (100 MHz, CDCl<sub>3</sub>)

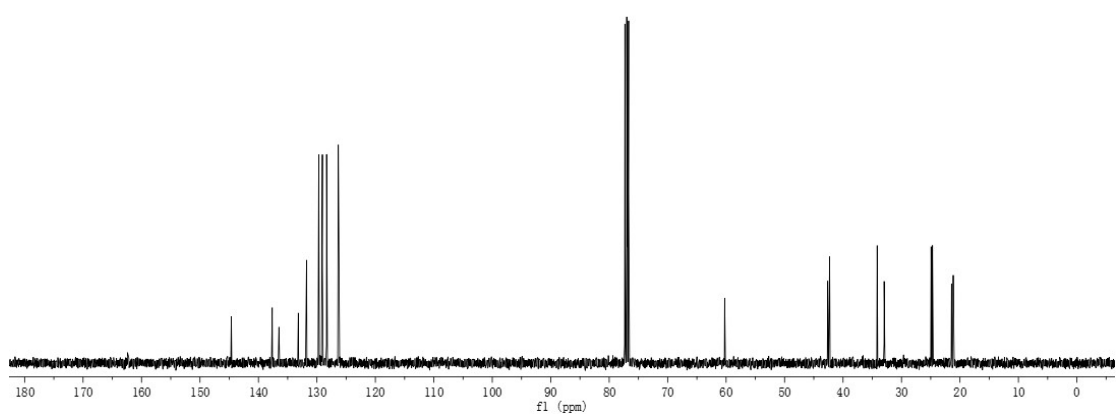

(E)-4-(4-(tert-butyl)phenyl)-1-tosylbut-3-en-2-yl(cyclopentyl)sulfane (4e)

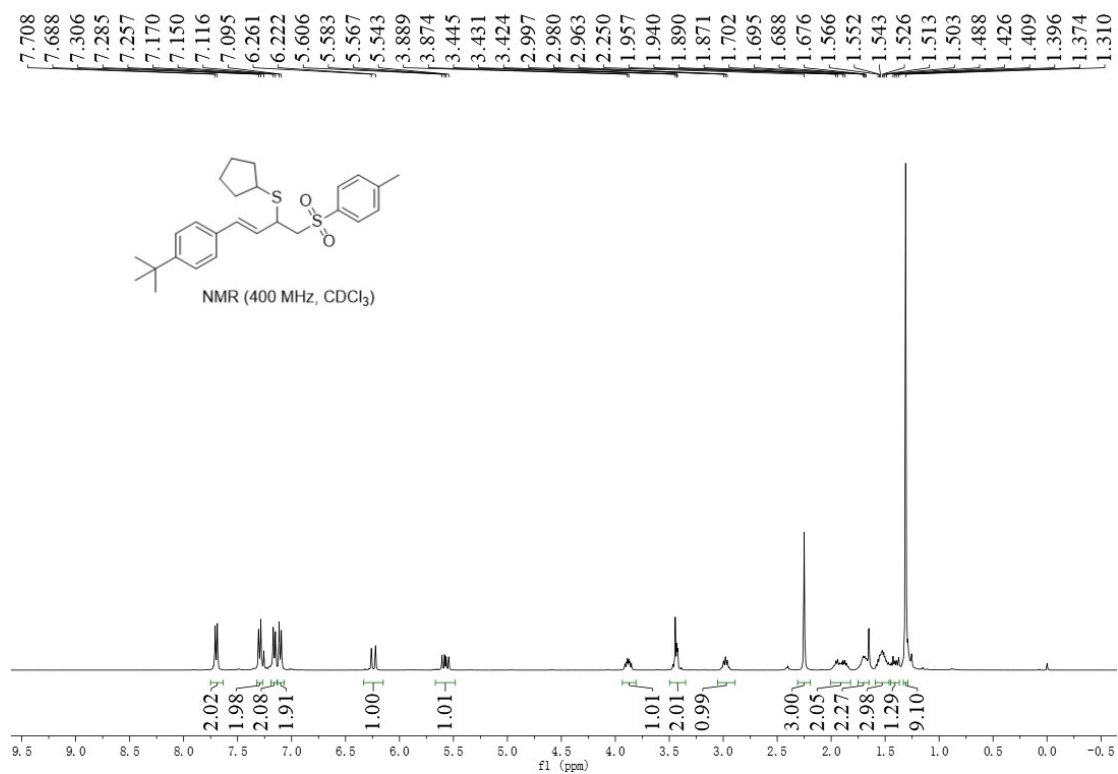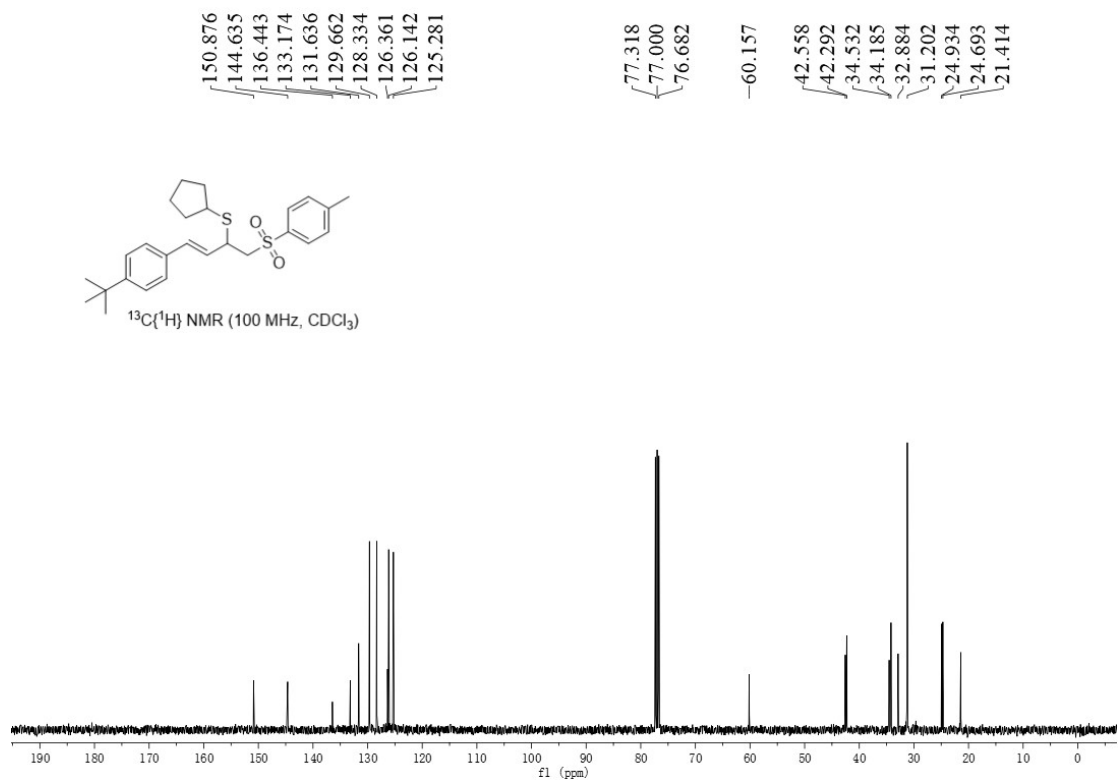

(E)-cyclopentyl(4-(4-fluorophenyl)-1-tosylbut-3-en-2-yl)sulfane (**4f**)

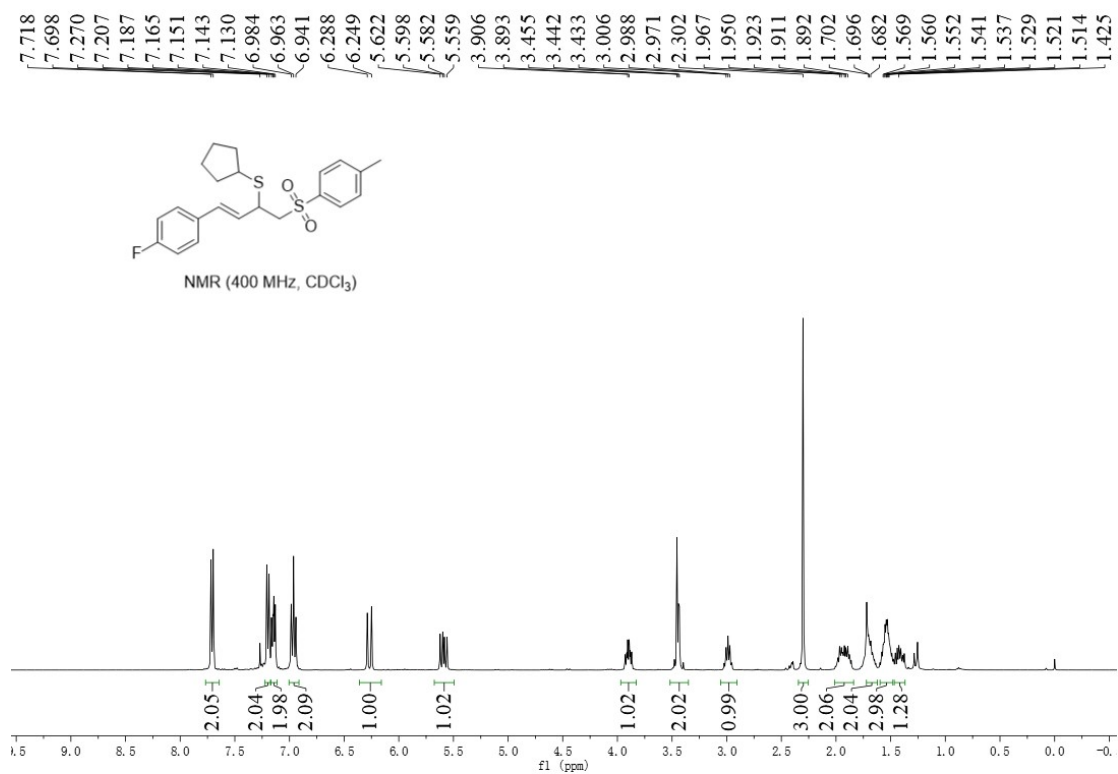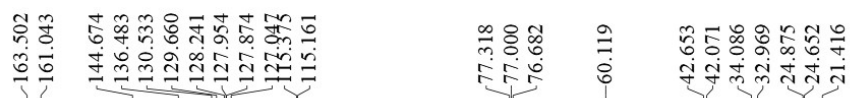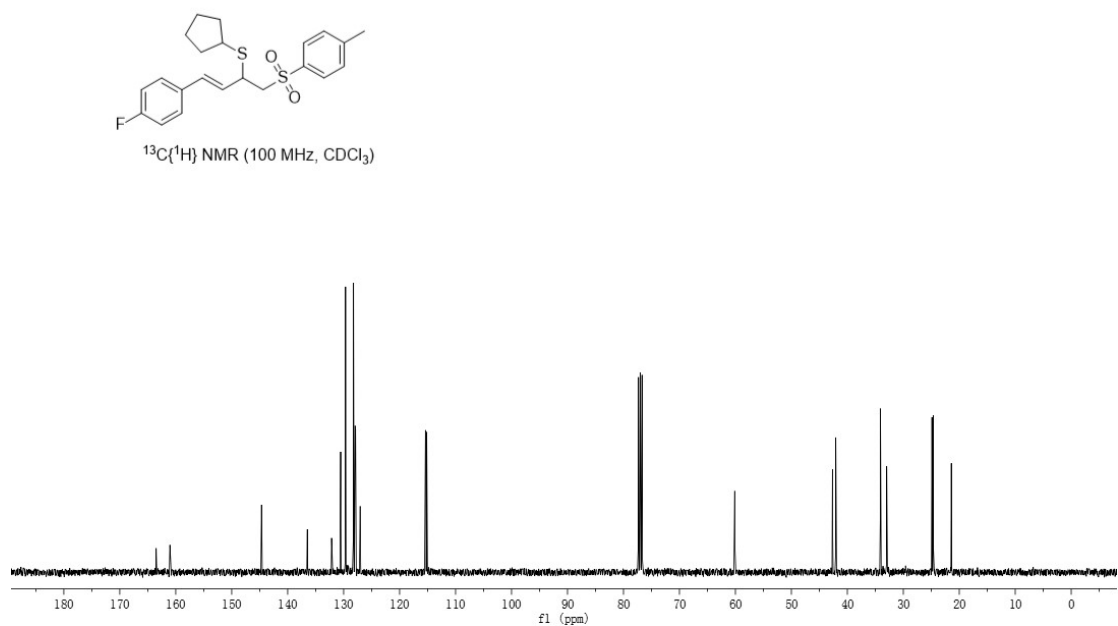

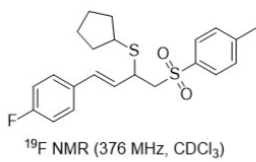

--113.849

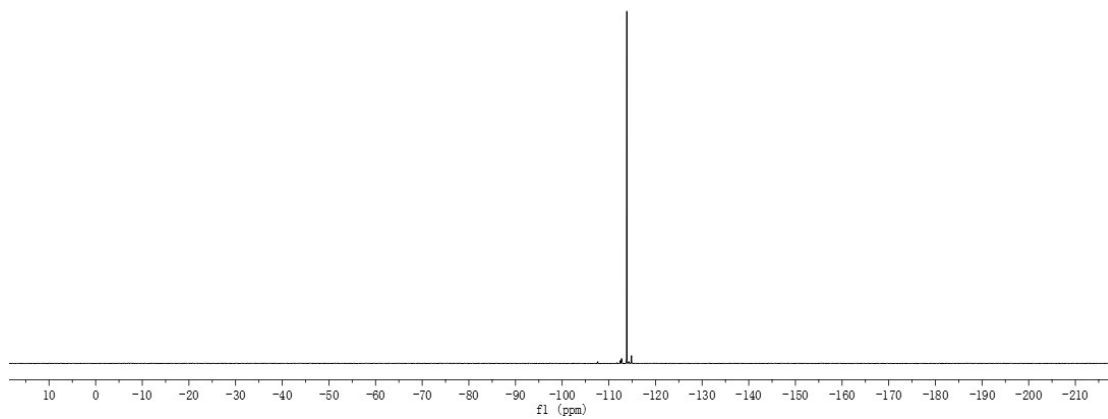

(E)-(4-(4-chlorophenyl)-1-tosylbut-3-en-2-yl)(cyclopentyl)sulfane (**4g**)

7.715  
7.695  
7.265  
7.254  
7.233  
7.213  
7.193  
7.118  
7.097  
6.278  
6.239  
5.688  
5.664  
5.649  
5.625  
3.909  
3.897  
3.886  
3.449  
3.439  
3.425  
3.425  
2.998  
2.981  
2.964  
2.312  
2.312  
1.967  
1.950  
1.925  
1.912  
1.893  
1.706  
1.686  
1.670  
1.583  
1.553  
1.542  
1.532  
1.514  
1.495  
1.439  
1.426  
1.407  
1.373  
0.000

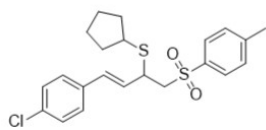

NMR (400 MHz, CDCl<sub>3</sub>)

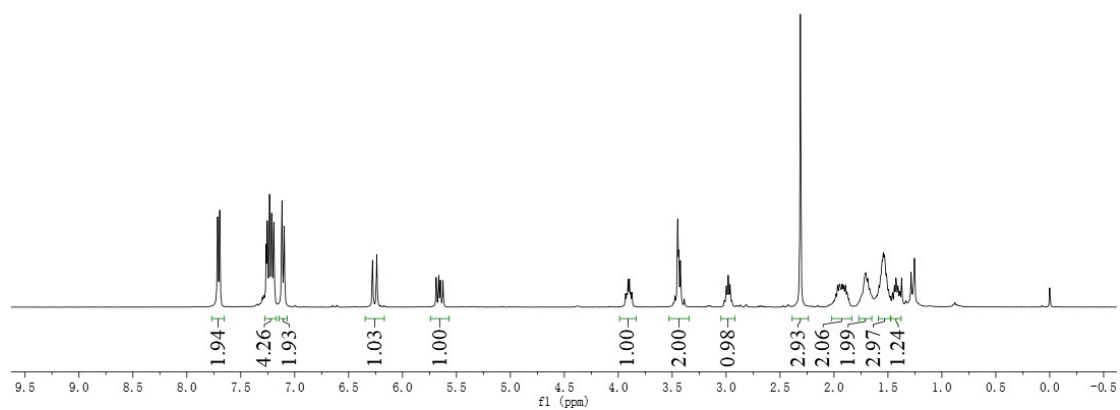

144.763  
136.539  
134.513  
133.425  
130.518  
129.738  
128.571  
128.287  
128.058  
127.615  
77.317  
77.000  
76.682  
-60.139  
42.758  
42.093  
34.150  
33.043  
24.929  
24.709  
21.482

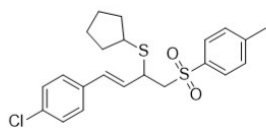

<sup>13</sup>C{<sup>1</sup>H} NMR (100 MHz, CDCl<sub>3</sub>)

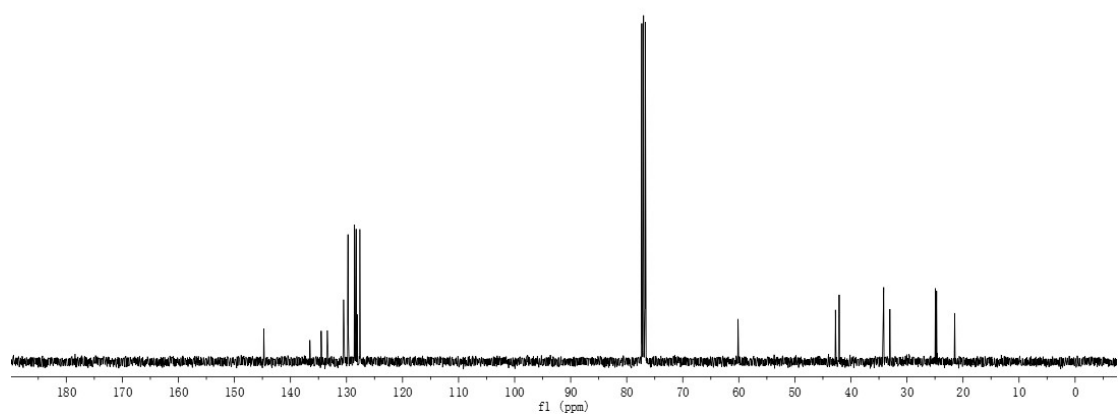

*(E)*-3-(3-(cyclopentylthio)-4-tosylbut-1-en-1-yl)thiophene (**4h**)

7.724  
7.703  
7.541  
7.521  
7.301  
7.281  
7.266  
7.210  
7.190  
6.359  
6.320  
5.840  
5.816  
5.801  
5.777  
3.949  
3.939  
3.927  
3.916  
3.463  
3.452  
3.440  
3.006  
2.989  
2.972  
2.287  
1.978  
1.961  
1.949  
1.931  
1.918  
1.899  
1.713  
1.693  
1.677  
1.631  
1.563  
1.548  
1.541  
1.500  
1.446  
1.428  
1.414  
0.000

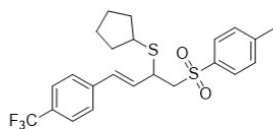

NMR (400 MHz, CDCl<sub>3</sub>)

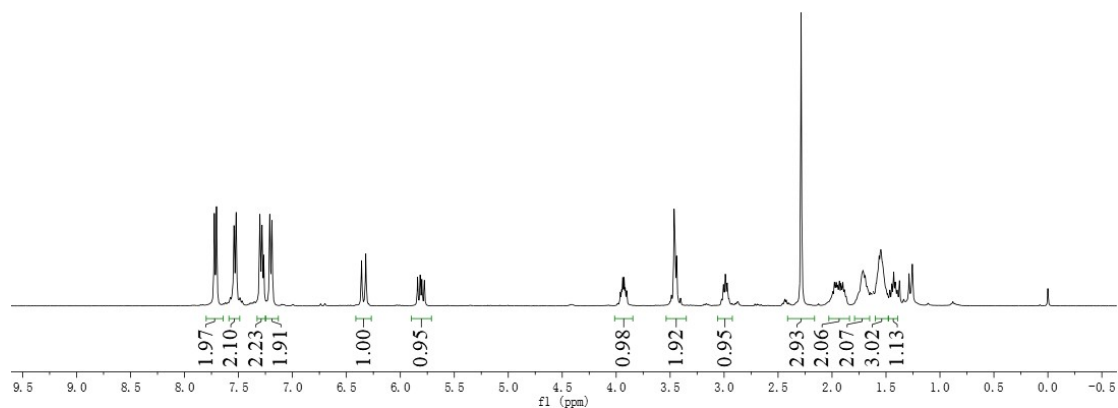

144.864  
139.509  
136.516  
130.267  
130.146  
130.024  
129.769  
129.701  
129.379  
129.058  
128.258  
126.560  
125.430  
125.394  
125.356  
125.318  
122.697  
77.318  
77.000  
76.683  
60.035  
42.832  
41.993  
34.161  
33.056  
24.921  
24.704  
21.410

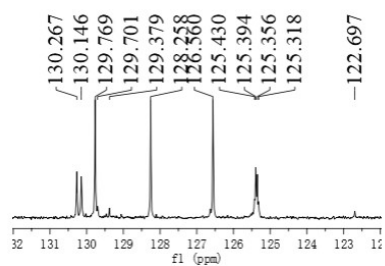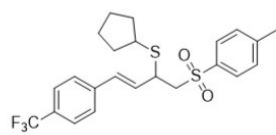

<sup>13</sup>C{<sup>1</sup>H} NMR (100 MHz, CDCl<sub>3</sub>)

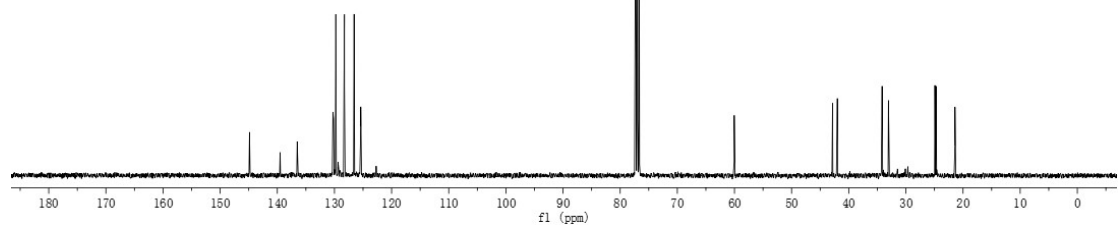

--62.560

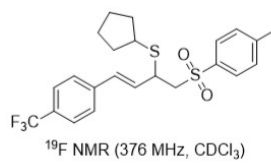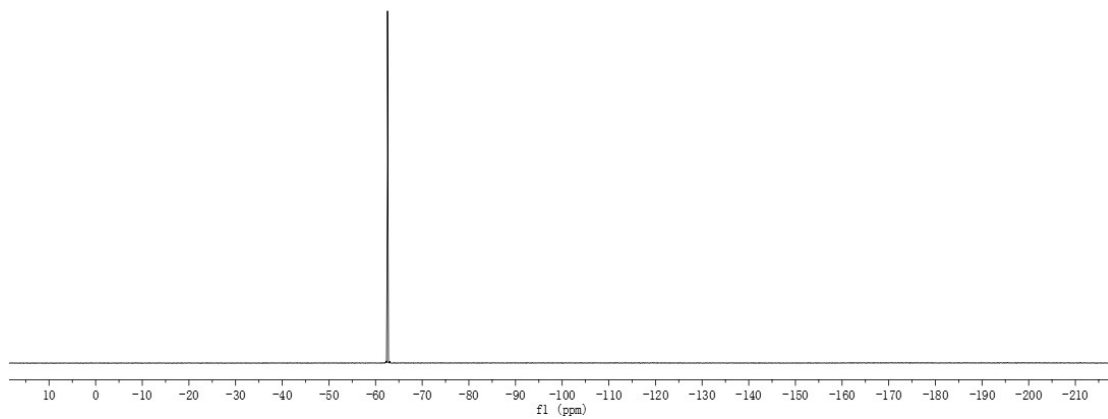

(E)-cyclopentyl(4-(*m*-tolyl)-1-tosylbut-3-en-2-yl)sulfane (**4i**)

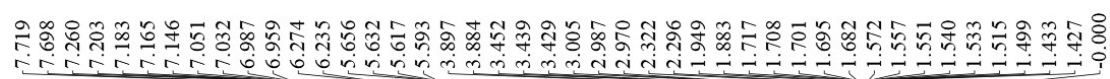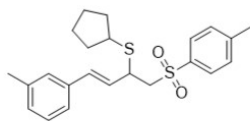

NMR (400 MHz, CDCl<sub>3</sub>)

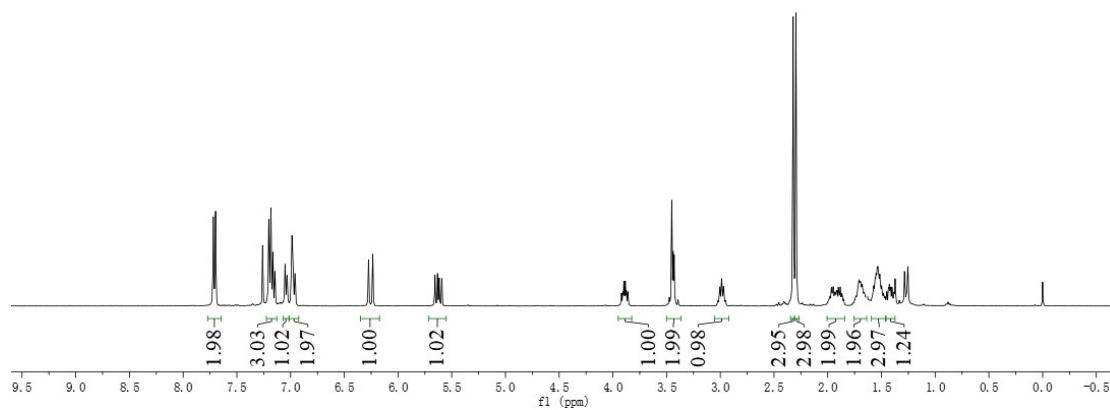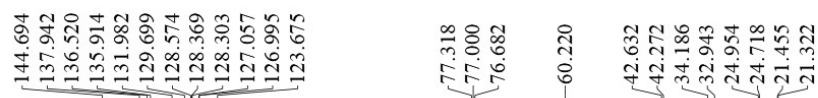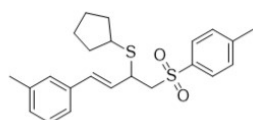

<sup>13</sup>C{<sup>1</sup>H} NMR (100 MHz, CDCl<sub>3</sub>)

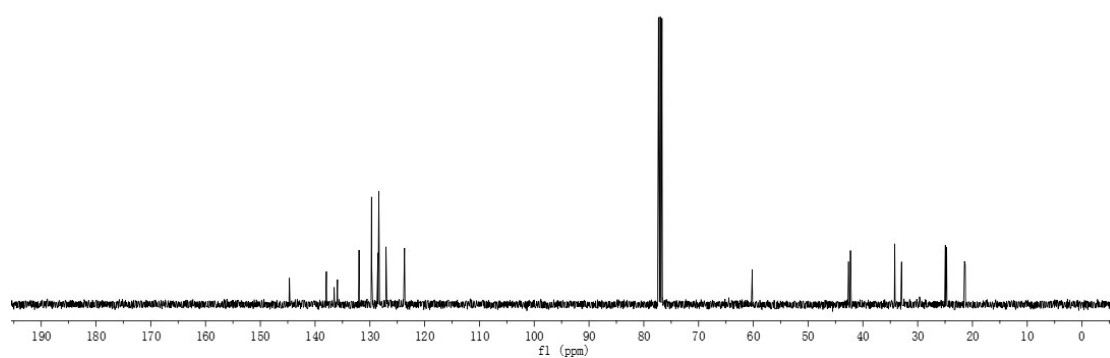

(E)-cyclopentyl(4-(3-methoxyphenyl)-1-tosylbut-3-en-2-yl)sulfane (**4j**)

7.715  
7.695  
7.264  
7.211  
7.201  
7.192  
7.181  
7.172  
6.794  
6.788  
6.777  
6.768  
6.760  
6.687  
6.274  
6.235  
5.657  
5.633  
5.618  
5.594  
3.903  
3.889  
3.796  
3.456  
3.443  
3.433  
2.990  
2.973  
2.295  
1.969  
1.952  
1.710  
1.703  
1.698  
1.684  
1.574  
1.560  
1.553  
1.543  
1.536  
1.518  
1.503  
1.437  
1.427

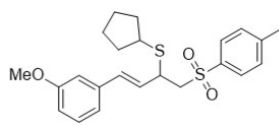

NMR (400 MHz, CDCl<sub>3</sub>)

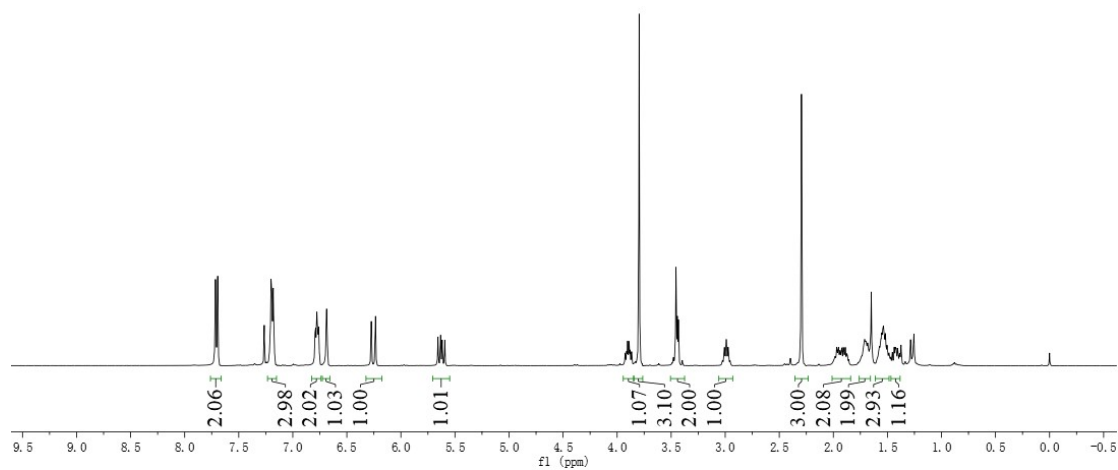

159.634  
144.761  
137.389  
136.464  
131.739  
129.705  
129.371  
128.334  
127.517  
119.171  
113.377  
111.639  
77.318  
77.000  
76.683  
60.151  
55.163  
42.655  
42.186  
34.167  
32.957  
24.936  
24.704  
21.427

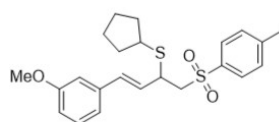

<sup>13</sup>C{<sup>1</sup>H} NMR (100 MHz, CDCl<sub>3</sub>)

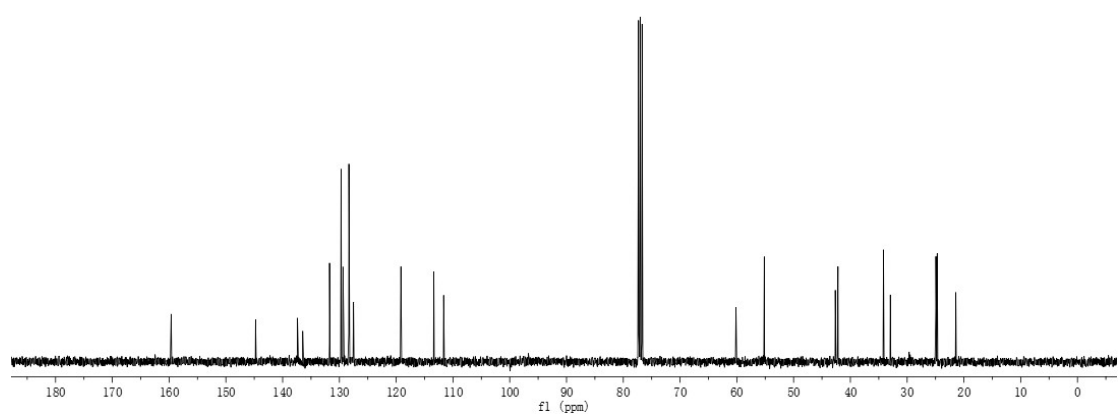

(E)-cyclopentyl(4-(2-methoxyphenyl)-1-tosylbut-3-en-2-yl)sulfane (4k)

7.730  
7.710  
7.218  
7.190  
7.170  
7.124  
7.106  
6.865  
6.849  
6.829  
6.632  
6.592  
5.665  
5.641  
5.626  
5.602  
3.903  
3.882  
3.863  
3.828  
3.456  
3.439  
3.016  
2.999  
2.982  
2.285  
1.986  
1.969  
1.917  
1.904  
1.886  
1.707  
1.697  
1.679  
1.660  
1.568  
1.529  
1.513  
1.497  
1.453  
1.437  
1.424  
1.405  
-0.000

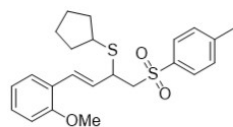

NMR (400 MHz, CDCl<sub>3</sub>)

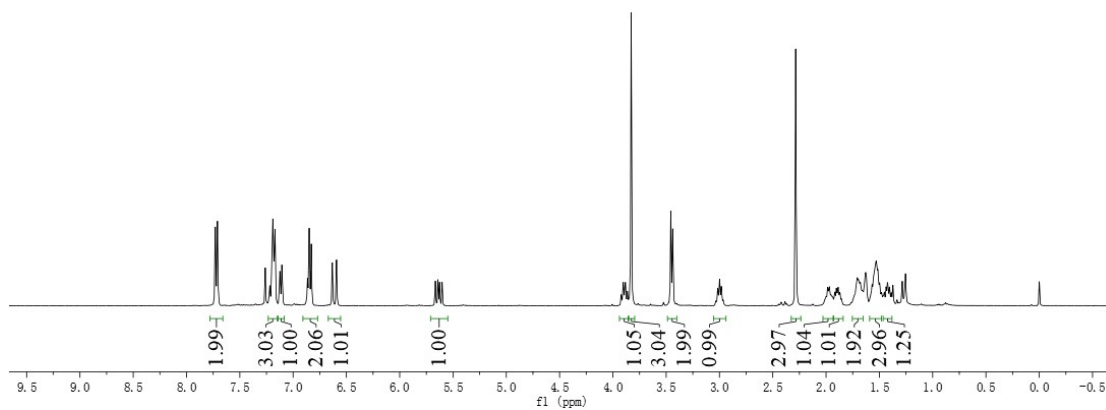

156.604  
144.581  
136.488  
129.603  
128.787  
128.457  
127.456  
126.813  
126.772  
110.381  
77.318  
77.000  
76.682  
60.316  
55.374  
42.776  
42.636  
34.182  
32.941  
24.964  
24.734  
21.461

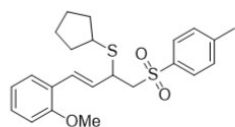

<sup>13</sup>C{<sup>1</sup>H} NMR (100 MHz, CDCl<sub>3</sub>)

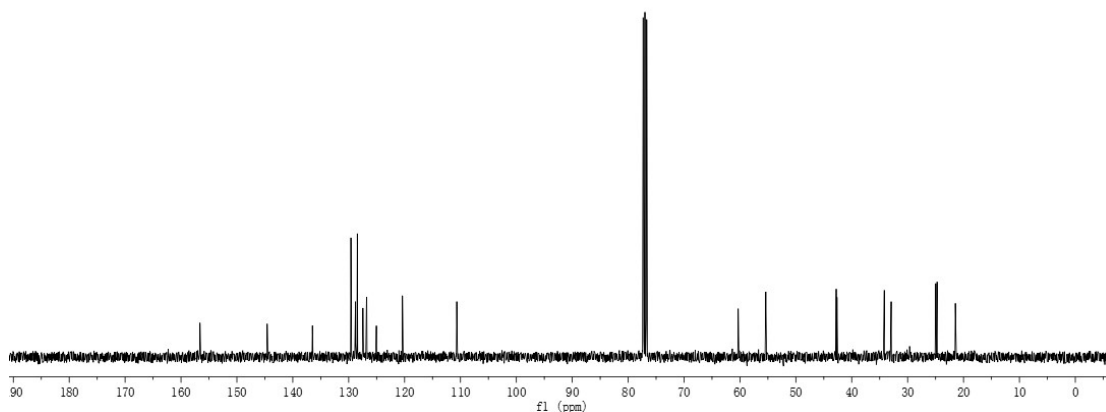

(E)-(4-(2-bromophenyl)-1-tosylbut-3-en-2-yl)(cyclopentyl)sulfane (**4I**)

7.765  
7.745  
7.546  
7.526  
7.263  
7.244  
7.207  
7.197  
7.114  
7.102  
7.093  
7.082  
6.628  
6.589  
5.665  
5.641  
5.626  
5.602  
3.907  
3.898  
3.885  
3.875  
3.450  
3.438  
3.427  
3.034  
3.016  
2.999  
2.314  
2.036  
2.020  
2.008  
1.930  
1.917  
1.899  
1.721  
1.703  
1.674  
1.556  
1.525  
1.427  
1.403  
1.385  
0.000

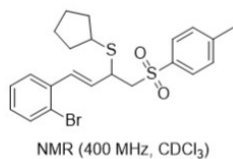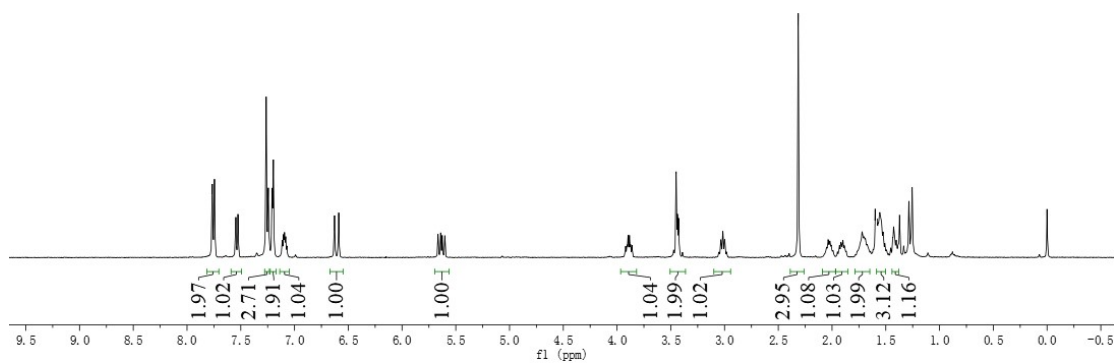

144.873  
136.347  
136.081  
132.781  
130.405  
130.110  
129.828  
129.043  
128.398  
127.362  
127.164  
123.441  
77.317  
77.000  
76.682  
-59.969  
42.708  
42.142  
34.241  
33.106  
32.782  
24.964  
24.772  
21.501

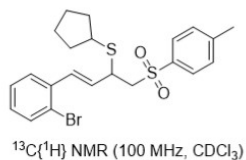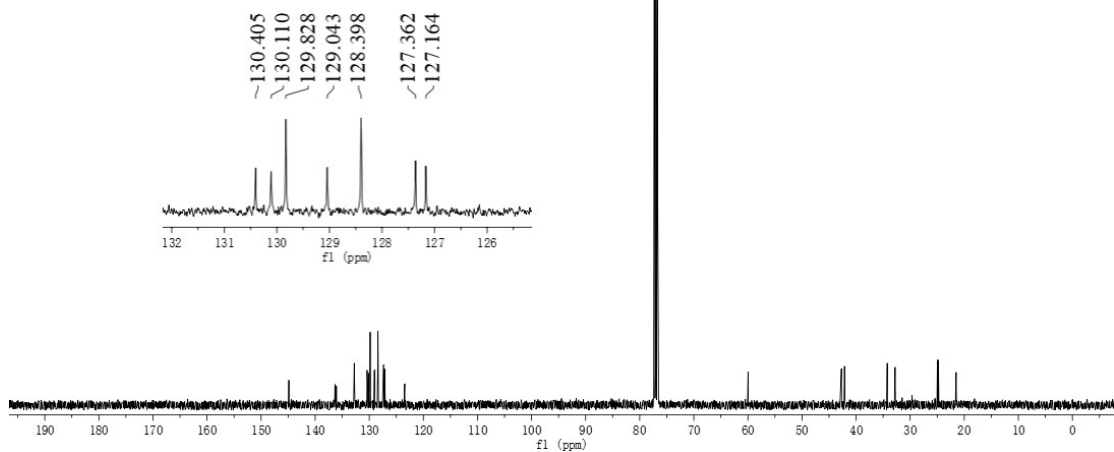

(E)-cyclopentyl(4-(2,4-dichlorophenyl)-1-tosylbut-3-en-2-yl)sulfane (**4m**)

7.750  
7.730  
7.363  
7.266  
7.247  
7.190  
7.169  
7.150  
7.128  
6.613  
6.574  
5.730  
5.706  
5.667  
3.908  
3.896  
3.884  
3.872  
3.445  
3.437  
3.420  
3.004  
2.987  
2.969  
2.336  
2.001  
1.985  
1.973  
1.928  
1.915  
1.897  
1.884  
1.717  
1.693  
1.674  
1.594  
1.581  
1.549  
1.436  
1.426  
1.403  
1.385  
0.000

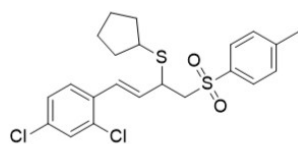

NMR (400 MHz, CDCl<sub>3</sub>)

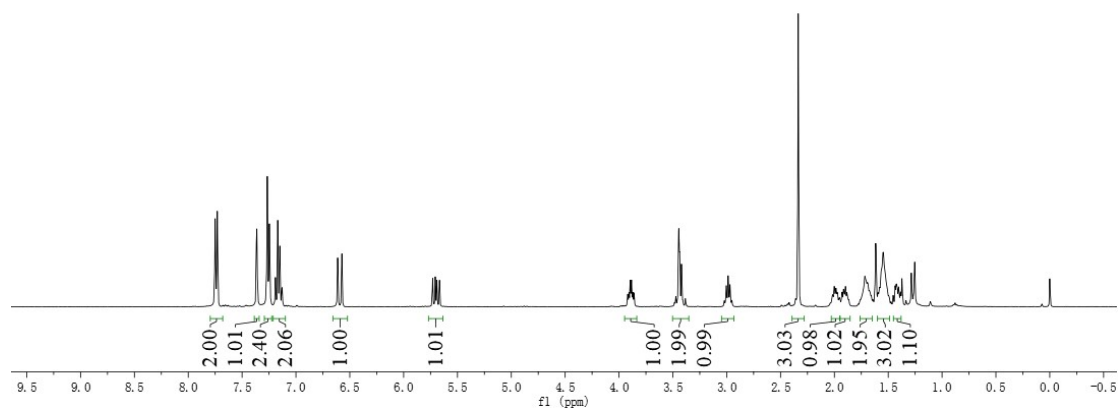

144.876  
136.372  
133.786  
133.352  
132.952  
130.653  
129.811  
129.278  
128.316  
127.669  
127.101  
126.691  
77.318  
77.000  
76.683  
59.946  
42.800  
42.132  
34.161  
32.870  
24.935  
24.723  
21.502

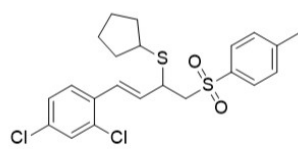

<sup>13</sup>C{<sup>1</sup>H} NMR (100 MHz, CDCl<sub>3</sub>)

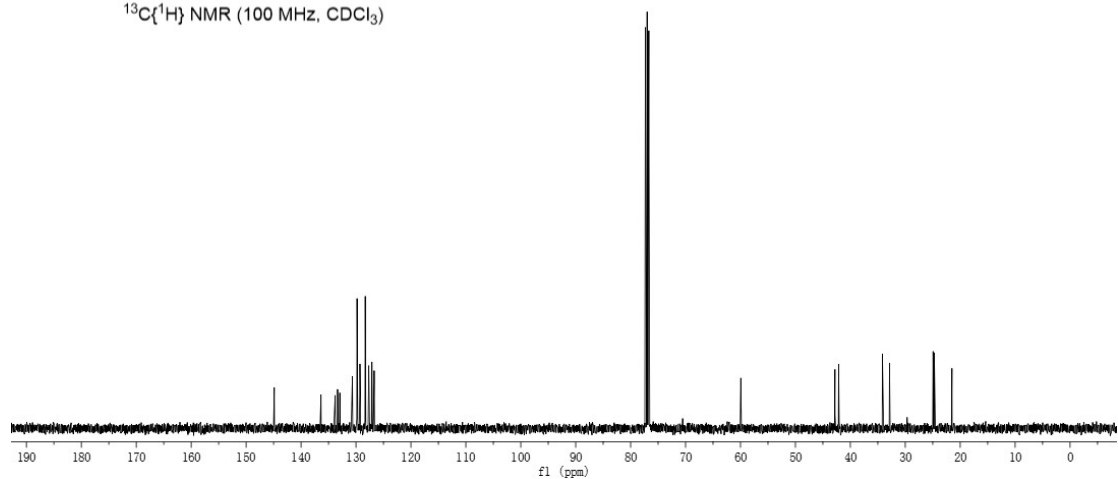

(E)-(4-(2-bromo-4-fluorophenyl)-1-tosylbut-3-en-2-yl)(cyclopentyl)sulfane (**4n**)

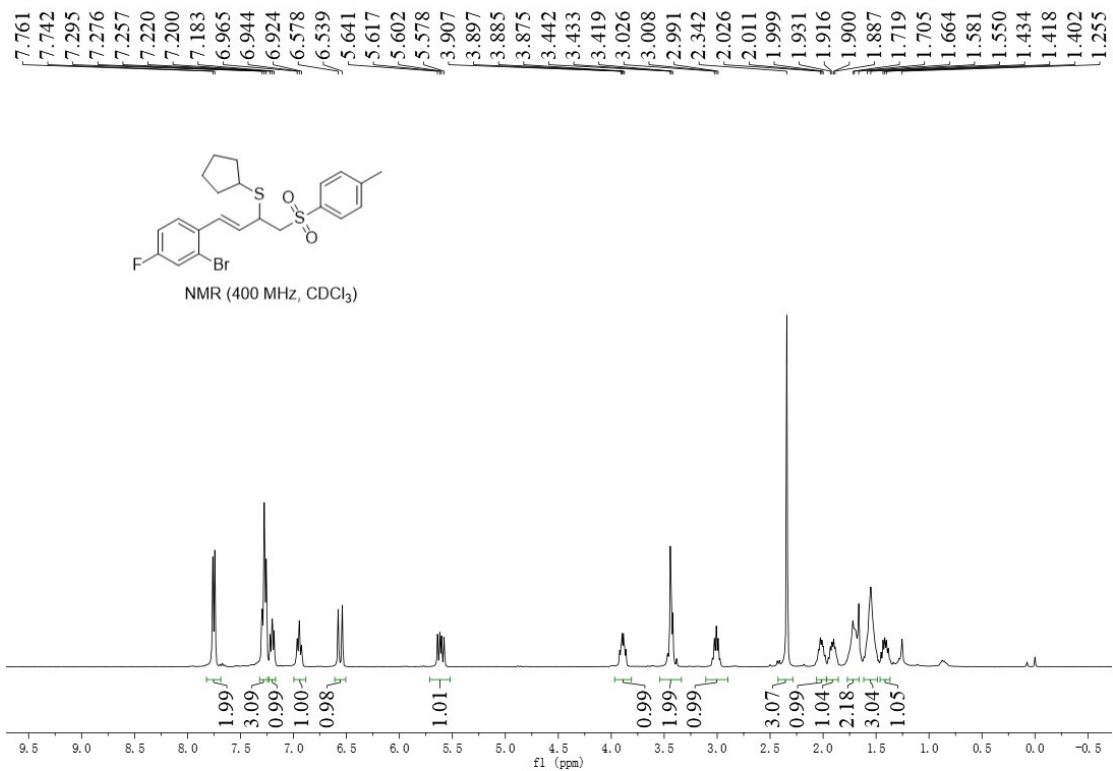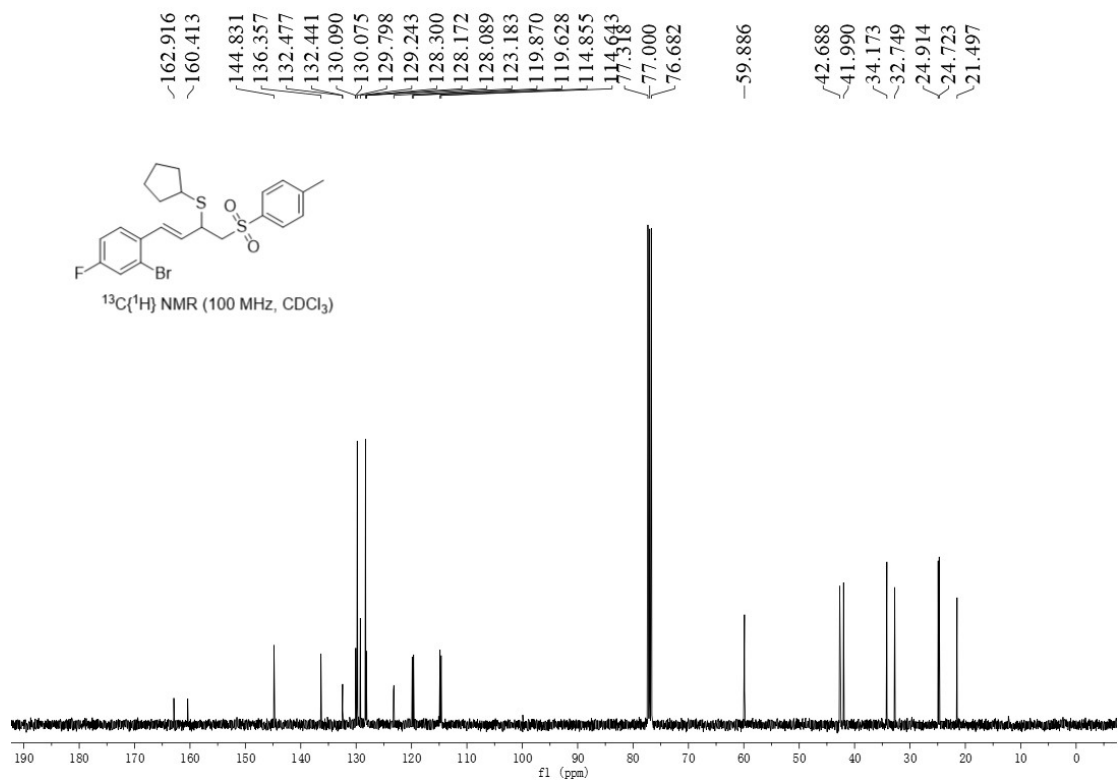

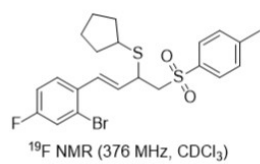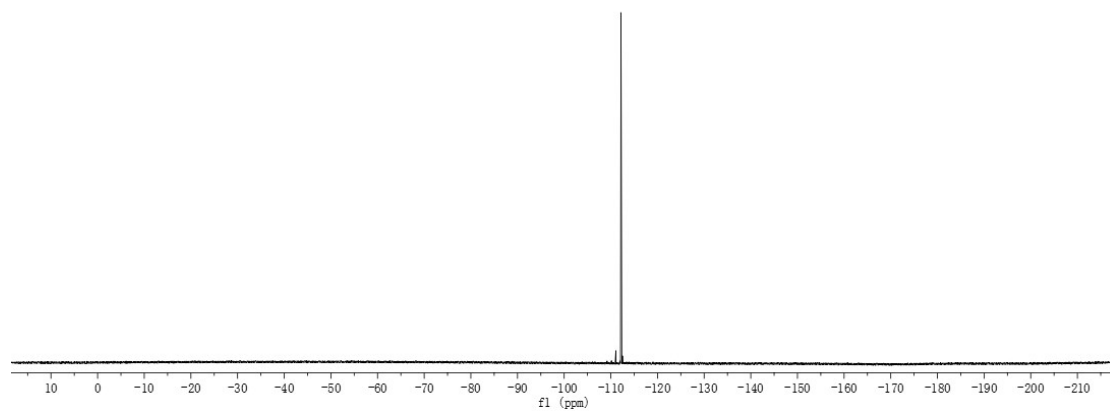

-112.179

(E)-3-(3-(cyclopentylthio)-4-tosylbut-1-en-1-yl)thiophene (**4o**)

7.714  
7.694  
7.263  
7.225  
7.206  
7.187  
7.053  
6.946  
6.934  
6.336  
6.297  
5.517  
5.493  
5.478  
5.454  
3.880  
3.869  
3.857  
3.846  
3.437  
3.428  
3.413  
3.012  
2.994  
2.977  
2.977  
1.964  
1.946  
1.925  
1.913  
1.894  
1.881  
1.704  
1.685  
1.669  
1.581  
1.540  
1.531  
1.511  
1.493  
1.456  
1.438  
1.425  
1.406  
0.000

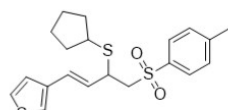

NMR (400 MHz, CDCl<sub>3</sub>)

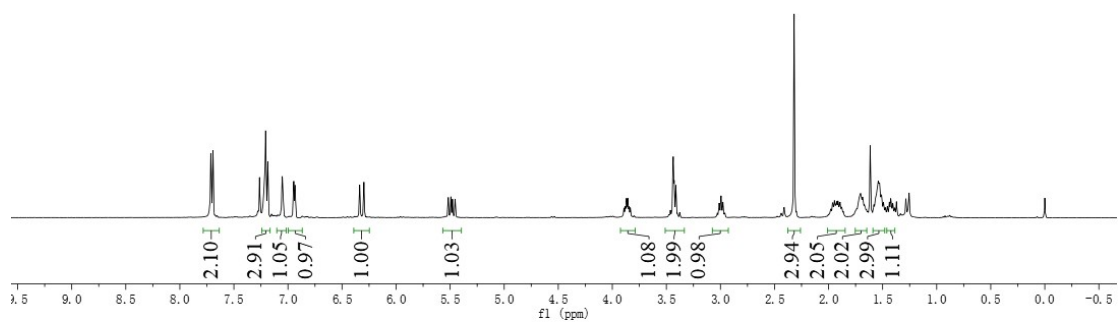

144.745  
138.667  
136.565  
129.659  
128.330  
127.149  
126.117  
125.830  
124.893  
122.479  
77.318  
77.000  
76.683  
60.266  
42.675  
42.200  
34.162  
32.979  
24.941  
24.716  
21.499

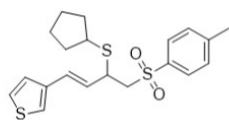

<sup>13</sup>C{<sup>1</sup>H} NMR (100 MHz, CDCl<sub>3</sub>)

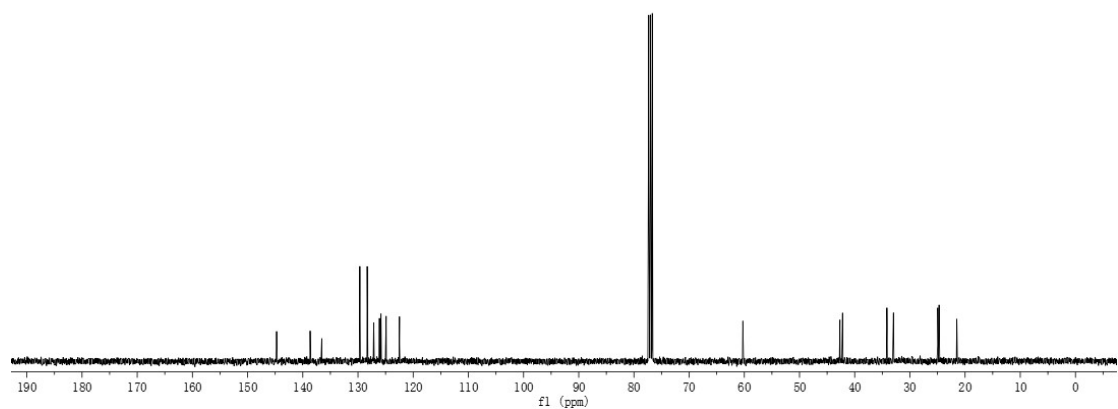

(E)-cyclopentyl(4-(naphthalen-2-yl)-1-tosylbut-3-en-2-yl)sulfane (**4p**)

7.773  
7.725  
7.704  
7.566  
7.463  
7.450  
7.306  
7.285  
7.251  
7.144  
7.124  
6.465  
6.426  
5.777  
5.753  
5.738  
5.714  
3.979  
3.961  
3.501  
3.484  
3.045  
3.028  
3.011  
2.173  
2.198  
1.981  
1.915  
1.898  
1.698  
1.682  
1.666  
1.649  
1.599  
1.583  
1.568  
1.530  
1.514  
1.495  
1.480  
1.468  
1.454  
1.438  
1.424

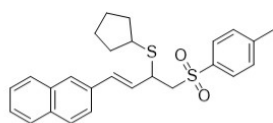

NMR (400 MHz, CDCl<sub>3</sub>)

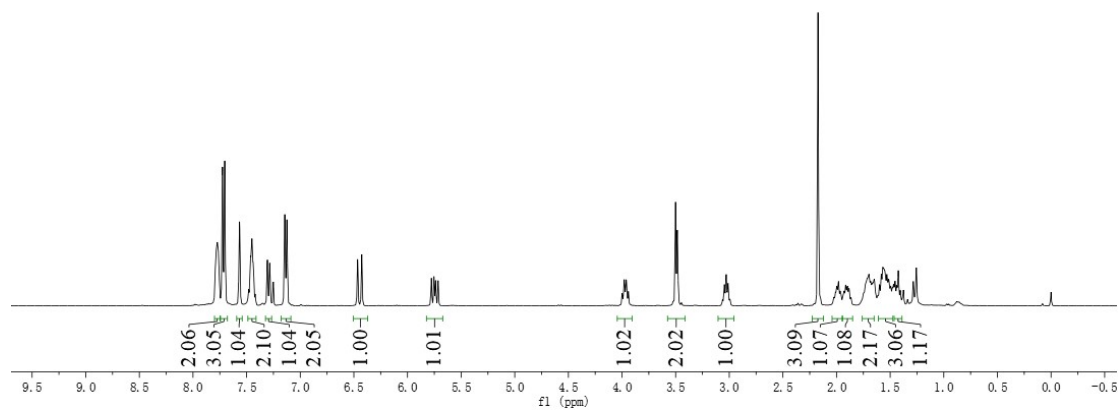

144.695  
136.504  
133.422  
133.360  
132.968  
131.935  
129.678  
128.327  
127.957  
127.862  
127.642  
127.575  
126.423  
126.314  
126.001  
123.417  
77.318  
77.000  
76.682  
-60.234  
42.730  
42.367  
34.176  
33.017  
24.925  
24.706  
21.350

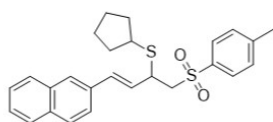

<sup>13</sup>C{<sup>1</sup>H} NMR (100 MHz, CDCl<sub>3</sub>)

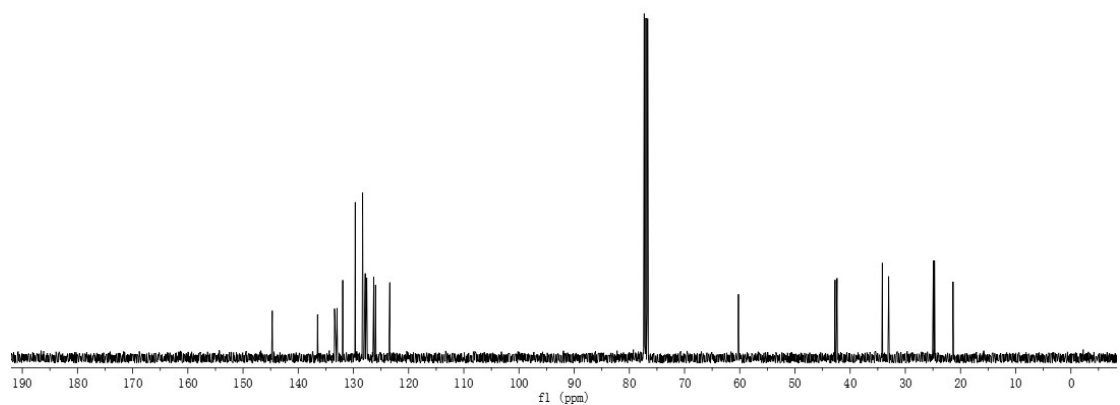

Cyclopentyl((3*E*,5*E*)-6-phenyl-1-tosylhexa-3,5-dien-2-yl)sulfane (**4q**)

7.724  
7.704  
7.323  
7.313  
7.302  
7.262  
7.252  
7.241  
7.231  
6.120  
6.094  
6.084  
6.063  
6.032  
6.006  
5.897  
5.875  
5.862  
5.840  
5.595  
5.576  
5.558  
5.540  
5.521  
4.475  
4.453  
3.801  
3.781  
2.896  
2.879  
2.861  
2.431  
1.970  
1.950  
1.938  
1.926  
1.909  
1.894  
1.866  
1.723  
1.534  
1.524  
1.485  
0.000

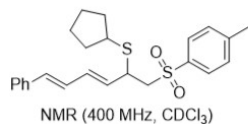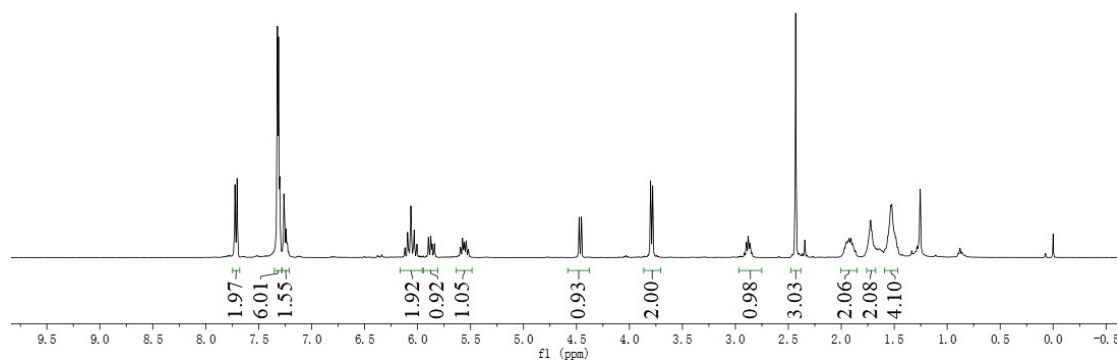

144.702  
140.423  
138.389  
136.185  
135.468  
129.658  
128.626  
128.400  
127.649  
127.322  
118.233  
77.318  
77.000  
76.683  
60.298  
51.873  
43.265  
33.811  
33.390  
24.933  
24.843  
21.616

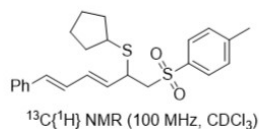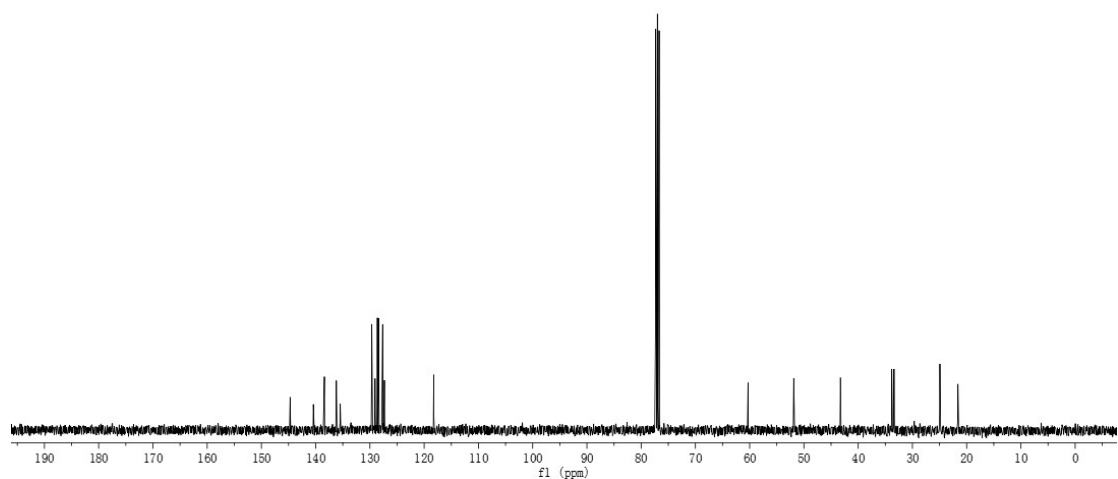

(*E*)-cyclopentyl(4-phenyl-1-(phenylsulfonyl)but-3-en-2-yl)sulfane (**4r**)

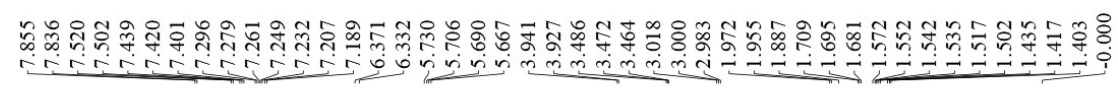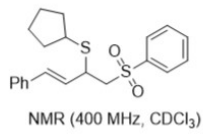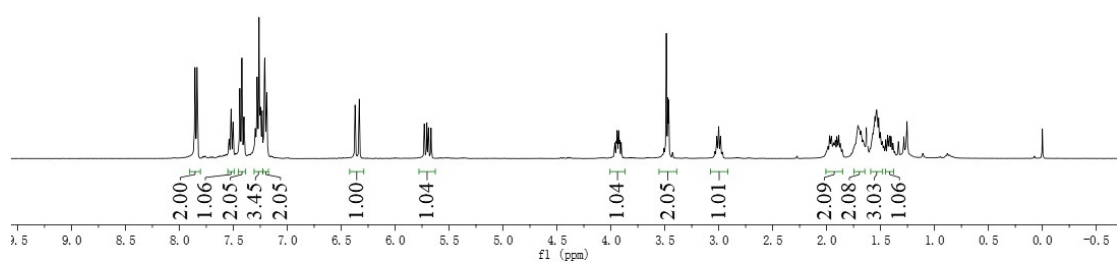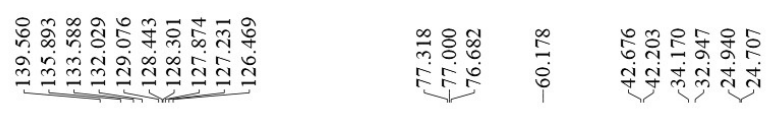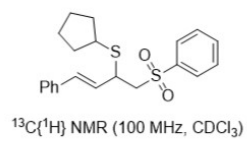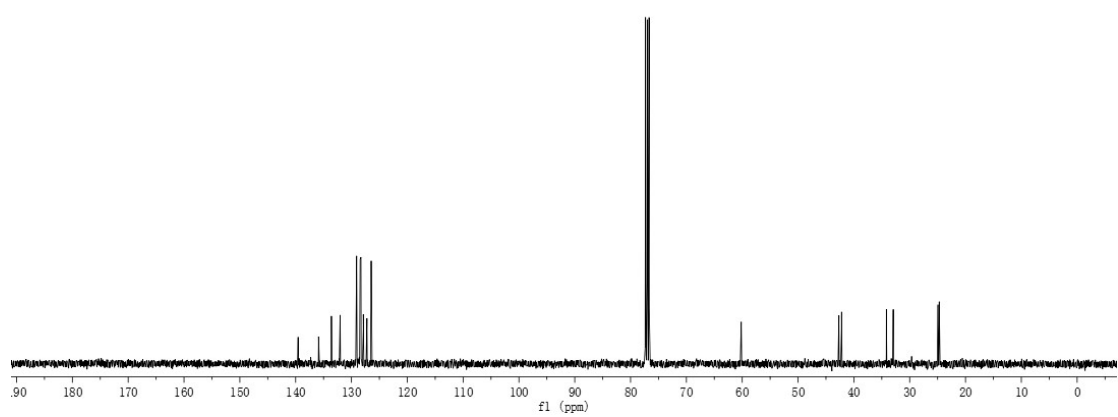

*(E)*-cyclopentyl(1-((4-methoxyphenyl)sulfonyl)-4-phenylbut-3-en-2-yl)sulfane (**4s**)

7.753  
7.748  
7.746  
7.736  
7.731  
7.293  
7.277  
7.272  
7.264  
7.258  
7.249  
7.245  
7.241  
7.228  
7.192  
7.188  
7.172  
6.829  
6.824  
6.811  
6.806  
6.309  
6.270  
5.663  
5.639  
5.624  
5.600  
3.909  
3.897  
3.695  
3.456  
3.448  
3.425  
2.998  
1.715  
1.706  
1.700  
1.567  
1.559  
1.552  
1.547  
1.541  
1.528  
1.519  
0.000

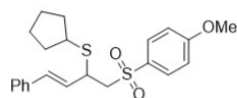

NMR (400 MHz, CDCl<sub>3</sub>)

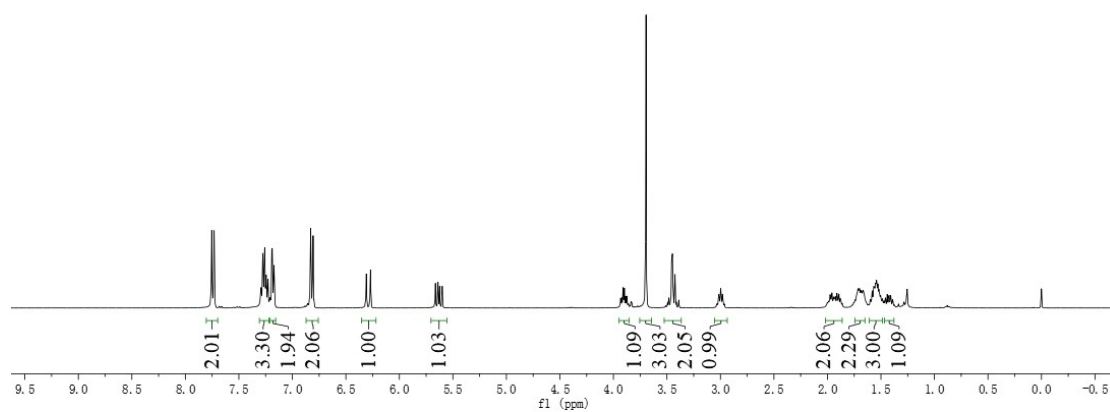

163.543  
135.998  
131.796  
130.803  
130.587  
128.407  
127.757  
127.280  
126.410  
114.209  
77.318  
77.000  
76.682  
60.339  
55.469  
42.601  
42.340  
34.176  
32.937  
24.933  
24.702

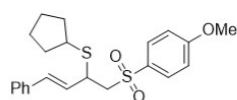

<sup>13</sup>C{<sup>1</sup>H} NMR (100 MHz, CDCl<sub>3</sub>)

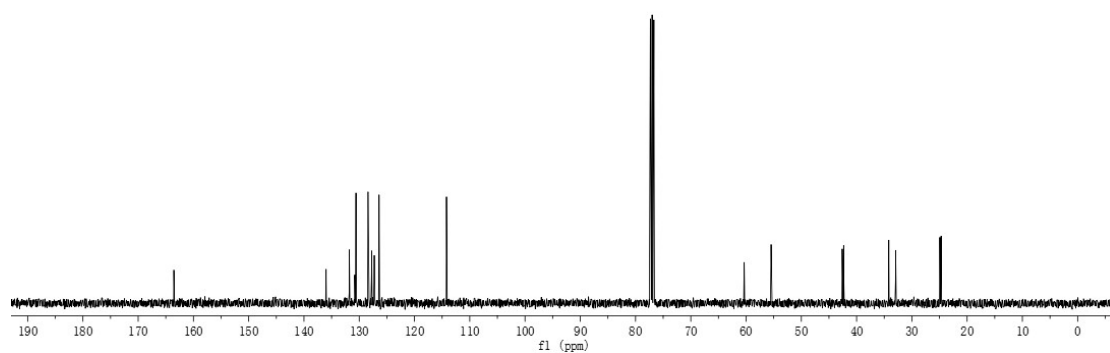

*(E)*-1-((4-(*tert*-butyl)phenyl)sulfonyl)-4-phenylbut-3-en-2-yl)(cyclopentyl)sulfane (**4t**)

7.751  
7.729  
7.397  
7.376  
7.279  
7.274  
7.261  
7.258  
7.239  
7.230  
7.213  
7.176  
7.172  
7.156  
6.356  
6.317  
5.645  
5.621  
5.606  
5.582  
3.969  
3.955  
3.481  
3.467  
3.459  
3.012  
2.995  
2.978  
1.957  
1.882  
1.710  
1.702  
1.695  
1.683  
1.578  
1.564  
1.555  
1.543  
1.538  
1.525  
1.515  
1.435  
1.216  
0.000

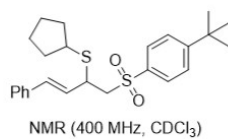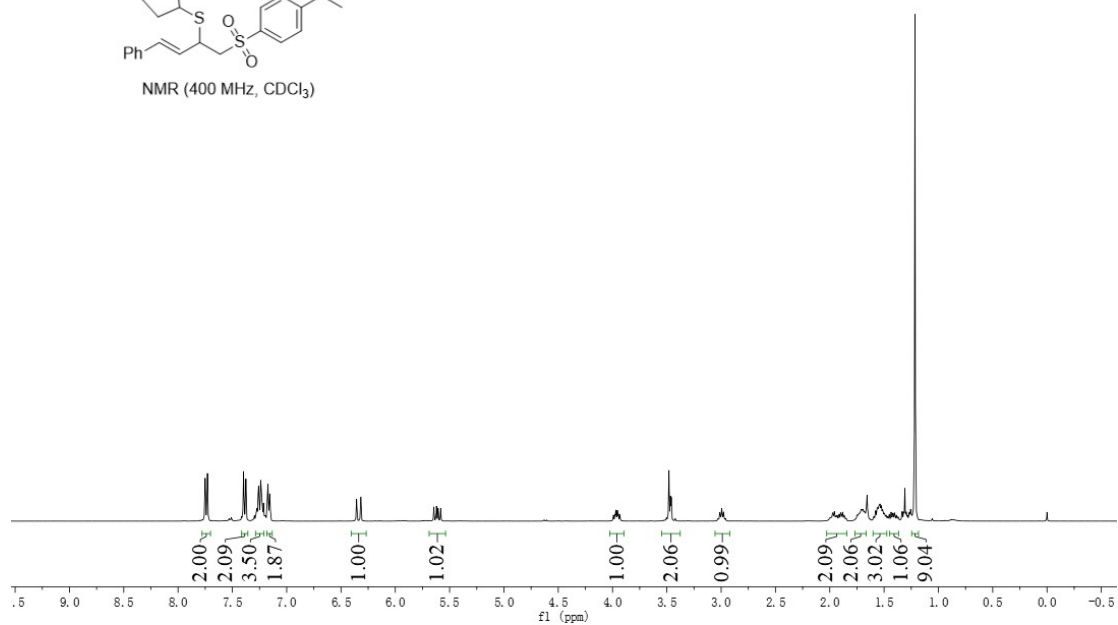

157.448  
136.386  
135.958  
131.987  
128.456  
128.225  
127.774  
127.217  
126.377  
126.021  
77.318  
77.000  
76.683  
60.139  
42.626  
42.295  
35.050  
34.144  
32.954  
30.843  
24.929  
24.698

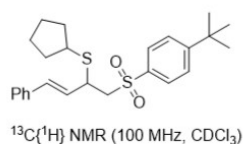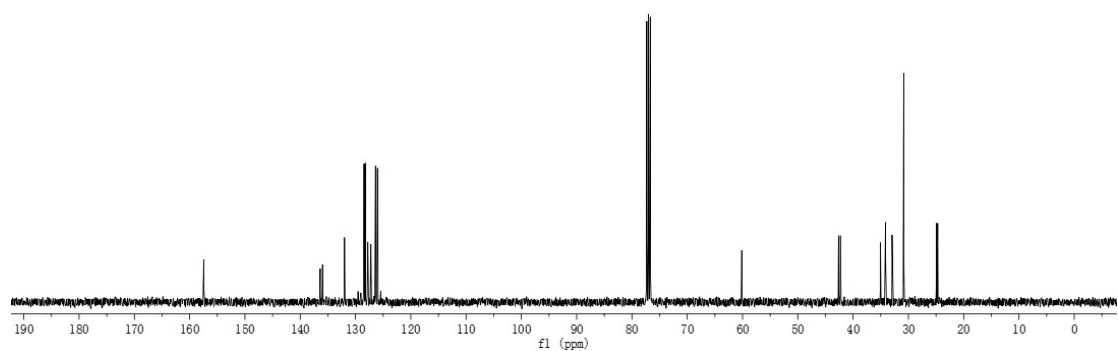

(E)-cyclopentyl(1-((4-fluorophenyl)sulfonyl)-4-phenylbut-3-en-2-yl)sulfane (**4u**)

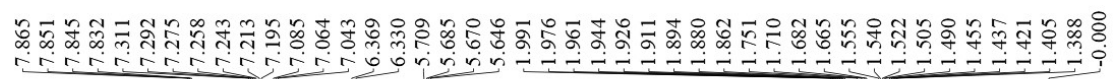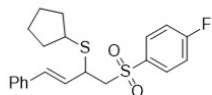

NMR (400 MHz, CDCl<sub>3</sub>)

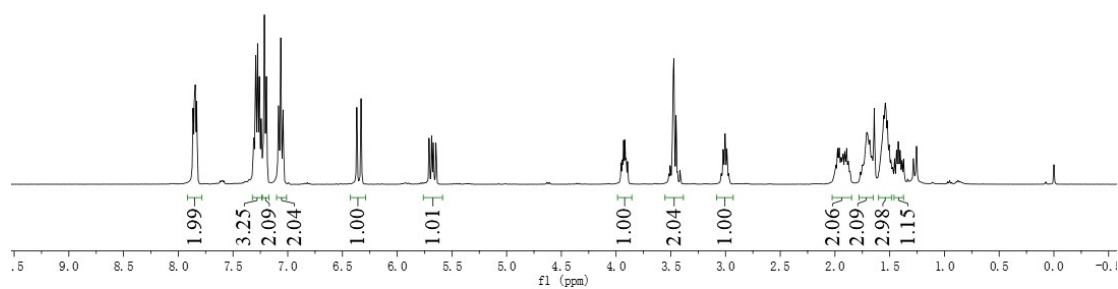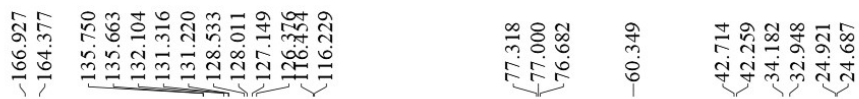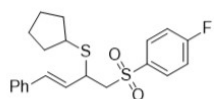

<sup>13</sup>C{<sup>1</sup>H} NMR (100 MHz, CDCl<sub>3</sub>)

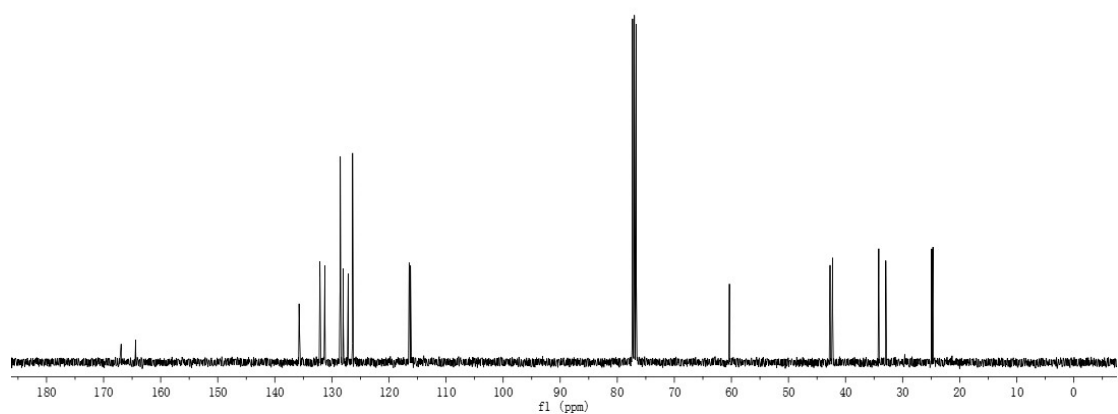

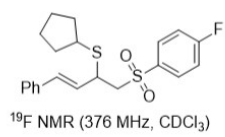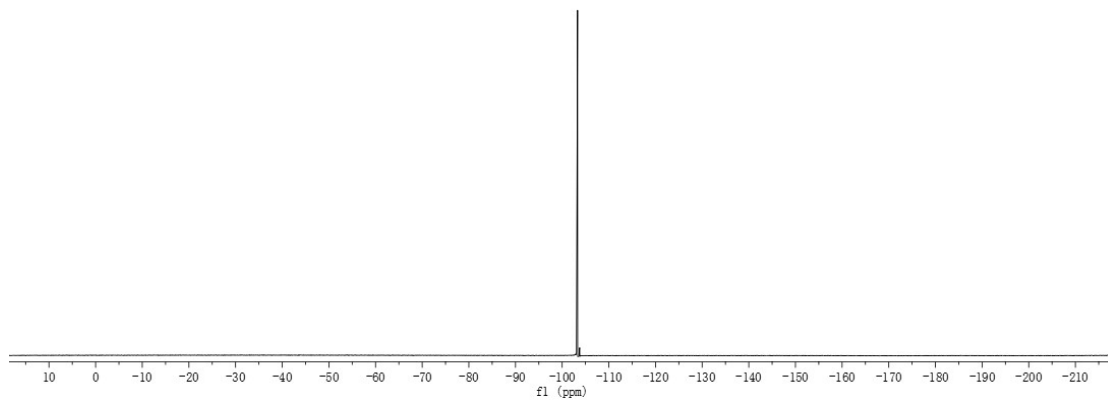

*(E)*-cyclopentyl(1-((4-iodophenyl)sulfonyl)-4-phenylbut-3-en-2-yl)sulfane (**4v**)

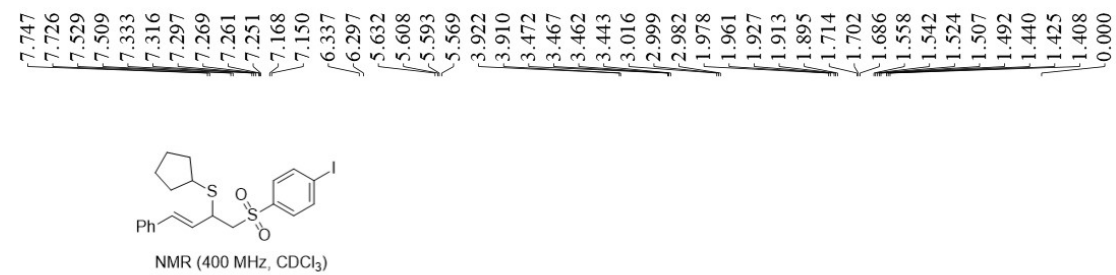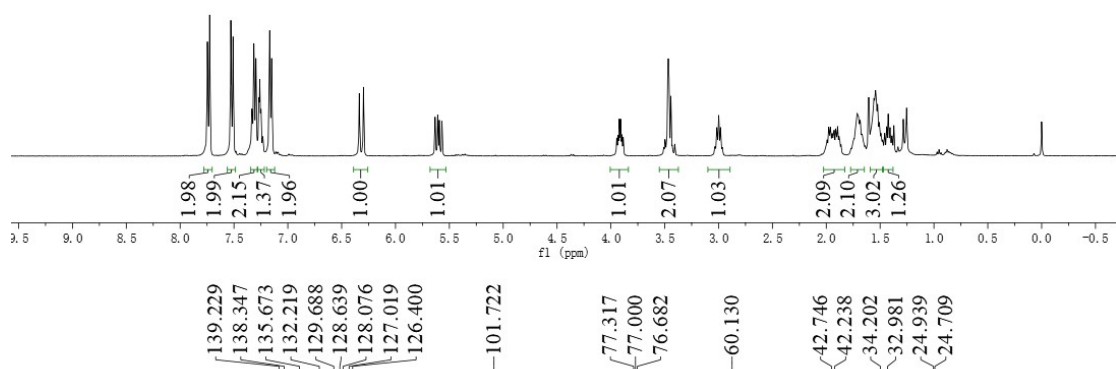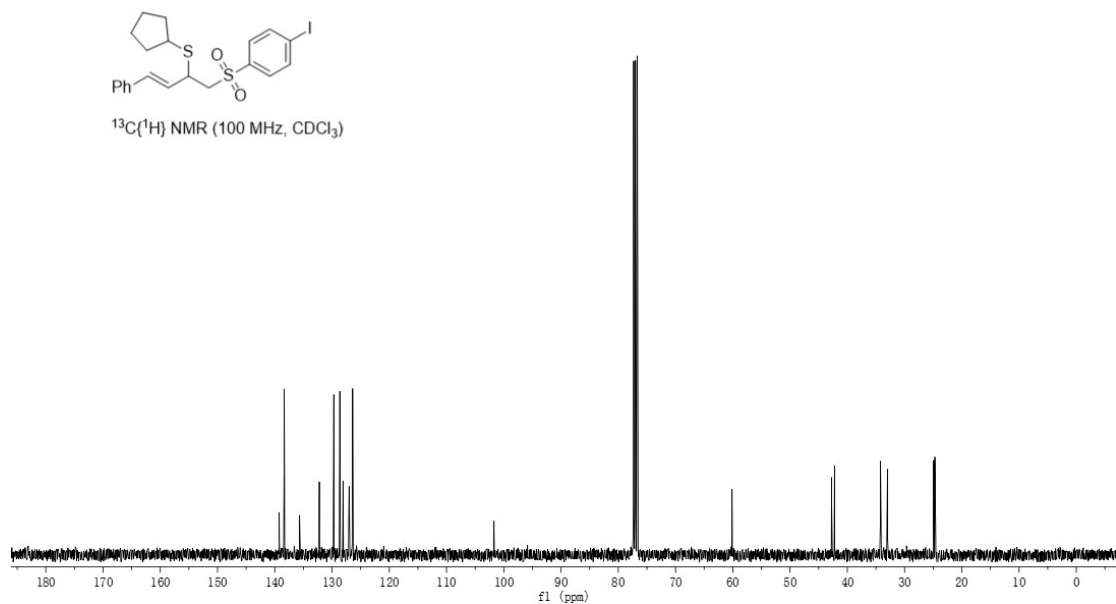

*(E)*-4-((2-(cyclopentylthio)-4-phenylbut-3-en-1-yl)sulfonyl)benzonitrile (**4w**)

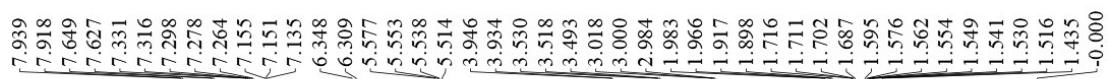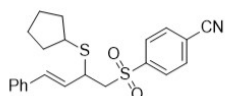

NMR (400 MHz, CDCl<sub>3</sub>)

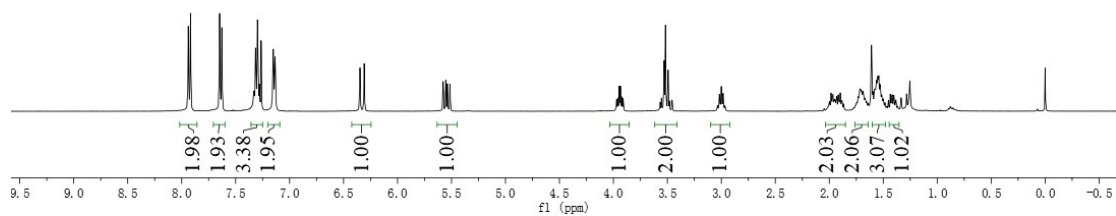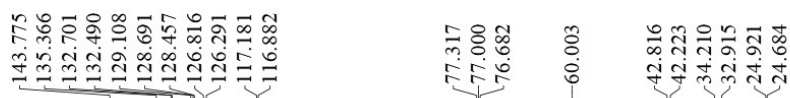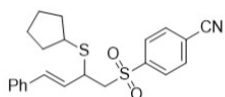

<sup>13</sup>C{<sup>1</sup>H} NMR (100 MHz, CDCl<sub>3</sub>)

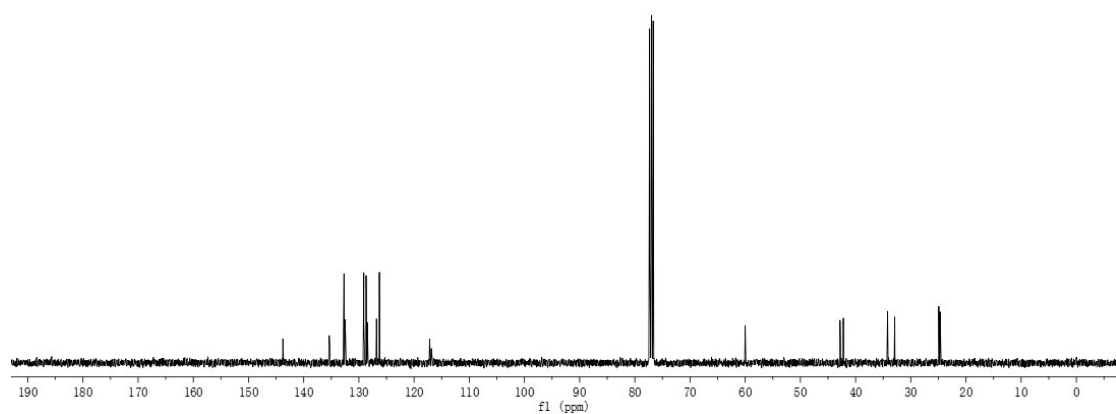

(E)-cyclopentyl(4-phenyl-1-(o-tolylsulfonyl)but-3-en-2-yl)sulfane (4x)

7.914  
7.911  
7.894  
7.891  
7.368  
7.365  
7.349  
7.346  
7.288  
7.283  
7.279  
7.266  
7.261  
7.248  
7.242  
7.238  
7.185  
7.181  
7.174  
7.165  
7.155  
6.297  
6.258  
6.257  
5.737  
5.713  
5.698  
5.674  
3.905  
3.515  
3.511  
3.495  
2.998  
2.688  
1.710  
1.704  
1.696  
1.679  
1.556  
1.544  
1.532  
1.521  
1.517  
1.502  
0.000

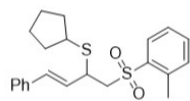

NMR (400 MHz, CDCl<sub>3</sub>)

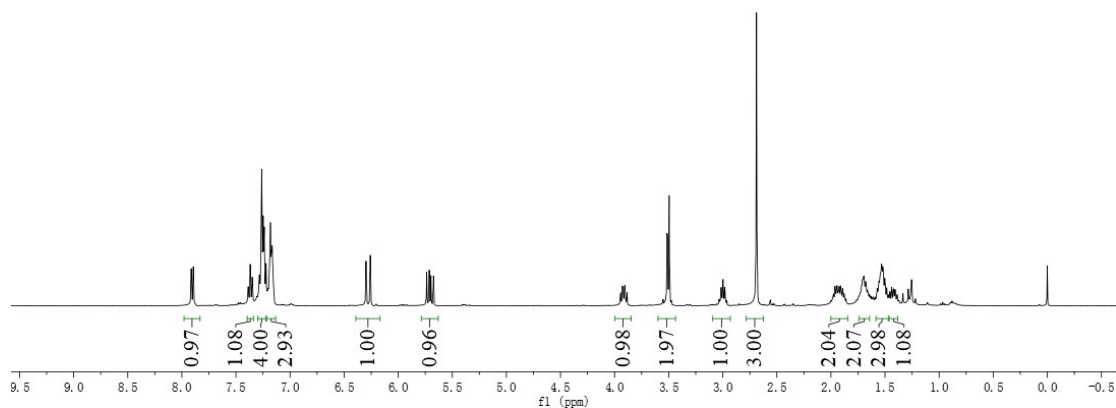

137.699  
137.631  
135.950  
133.591  
132.538  
132.011  
130.639  
128.403  
127.828  
127.137  
126.453

77.317  
77.000  
76.682

-59.258

42.749  
42.159  
34.156  
33.013  
24.946  
24.715  
20.385

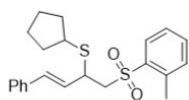

<sup>13</sup>C{<sup>1</sup>H} NMR (100 MHz, CDCl<sub>3</sub>)

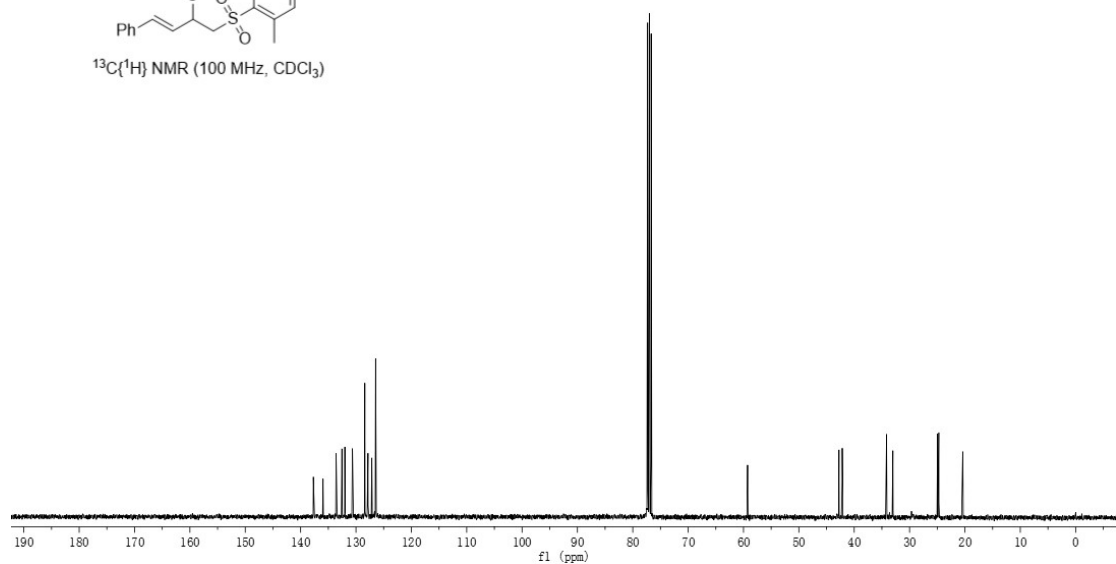

(E)-cyclopentyl(1-(naphthalen-2-ylsulfonyl)-4-phenylbut-3-en-2-yl)sulfane (4y)

8.393  
7.888  
7.866  
7.824  
7.819  
7.814  
7.804  
7.798  
7.793  
7.753  
7.732  
7.615  
7.598  
7.578  
7.526  
7.508  
7.259  
7.140  
7.131  
7.126  
7.024  
7.021  
7.008  
7.002  
6.325  
6.286  
5.658  
5.634  
5.619  
5.595  
3.968  
3.955  
3.559  
3.547  
3.536  
2.984  
1.687  
1.673  
1.547  
1.537  
1.529  
1.520  
1.506  
1.493

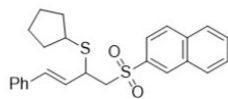

NMR (400 MHz, CDCl<sub>3</sub>)

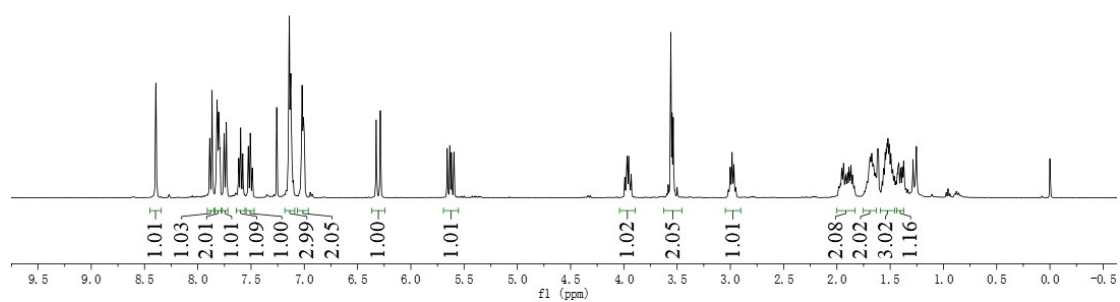

136.311  
135.709  
135.180  
132.044  
131.992  
130.559  
129.429  
129.284  
129.186  
128.343  
127.786  
127.739  
127.515  
127.054  
126.276  
122.704  
77.318  
77.000  
76.683  
60.126  
42.683  
42.379  
34.189  
32.970  
24.926  
24.695

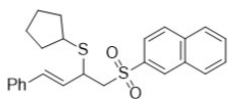

<sup>13</sup>C{<sup>1</sup>H} NMR (100 MHz, CDCl<sub>3</sub>)

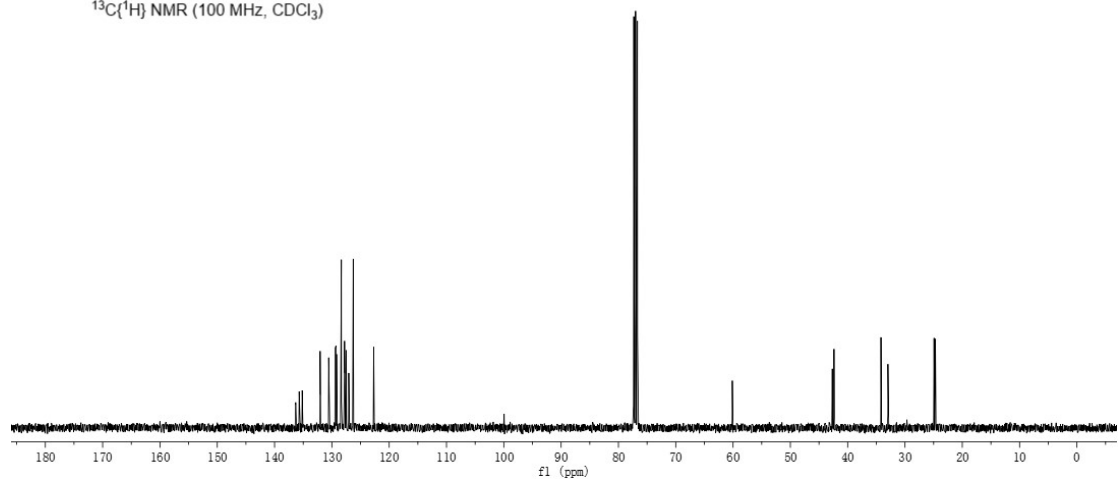

(E)-2-((2-(cyclopentylthio)-4-phenylbut-3-en-1-yl)sulfonyl)thiophene (**4z**)

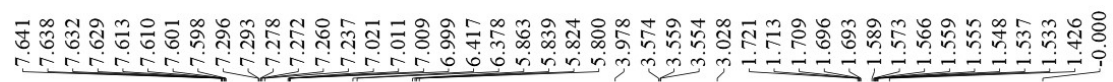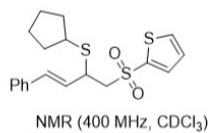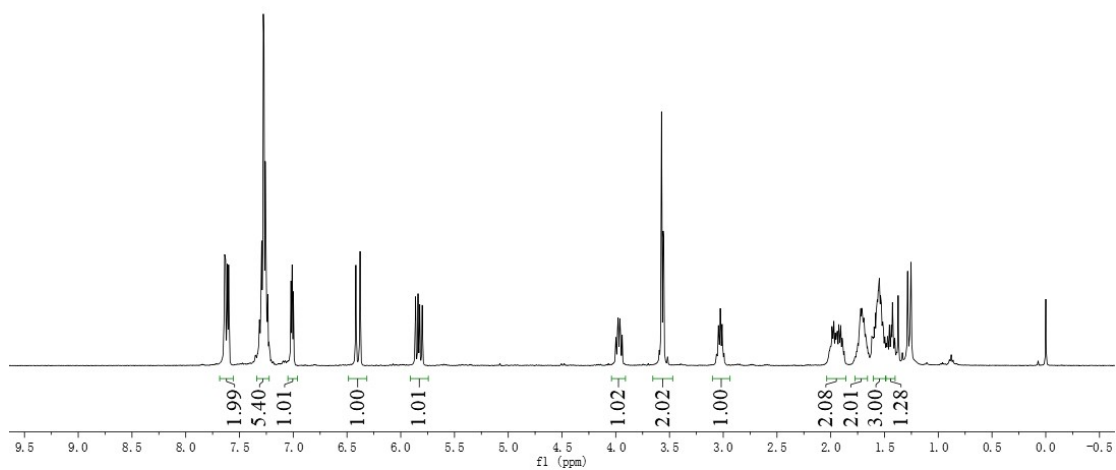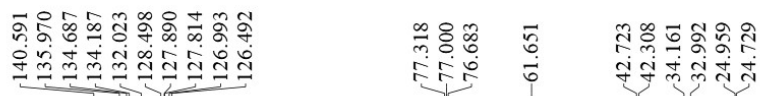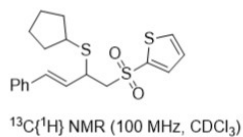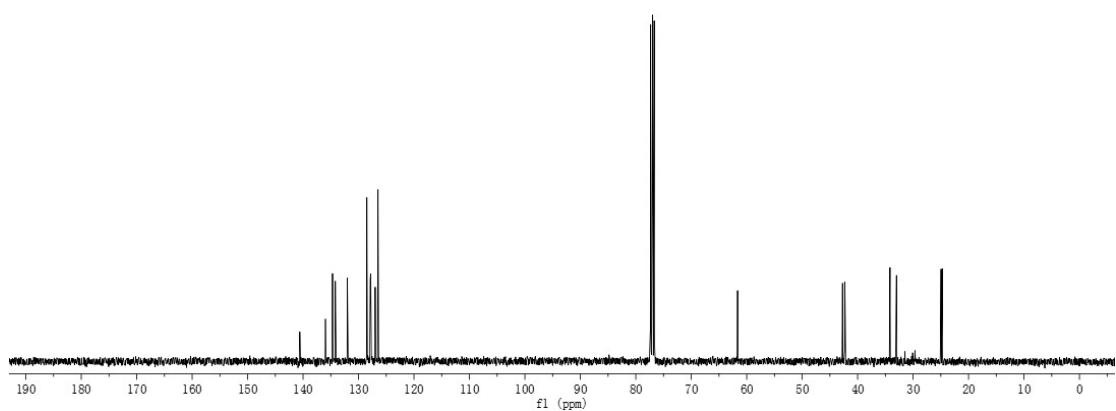



(*E*)-cyclopentyl(1-(ethylsulfonyl)-4-phenylbut-3-en-2-yl)sulfane (**4zb**)

7.406  
7.388  
7.355  
7.337  
7.318  
7.288  
7.271  
7.262  
6.579  
6.540  
6.085  
6.061  
6.046  
6.022  
4.038  
4.015  
3.298  
3.293  
3.278  
3.092  
3.074  
3.055  
3.036  
2.045  
2.015  
1.976  
1.756  
1.745  
1.730  
1.716  
1.668  
1.651  
1.635  
1.619  
1.604  
1.591  
1.576  
1.559  
1.540  
1.498  
1.466  
1.386  
1.368  
1.349

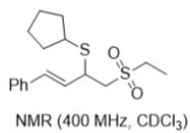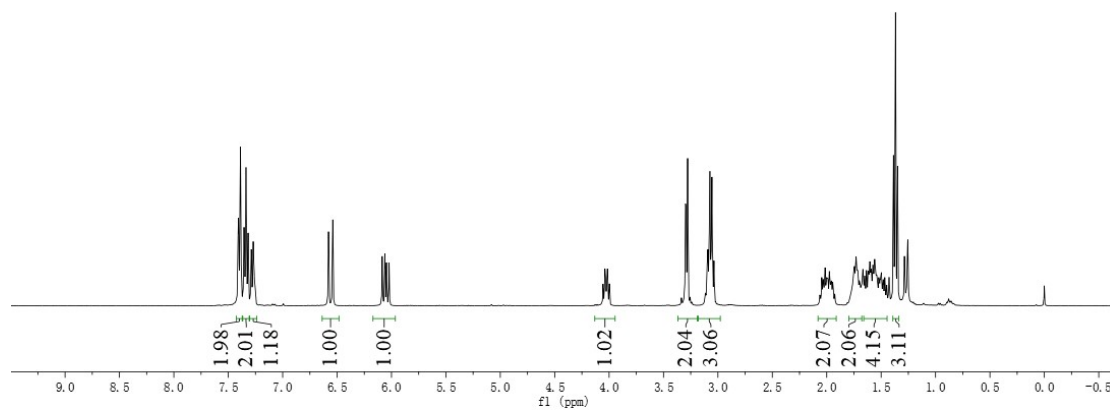

135.754  
132.155  
128.672  
128.100  
127.559  
126.509

77.317  
77.000  
76.682

56.241  
49.046  
42.986  
42.079  
34.243  
32.966  
24.935  
24.686

6.504

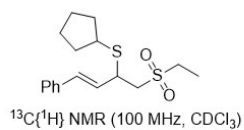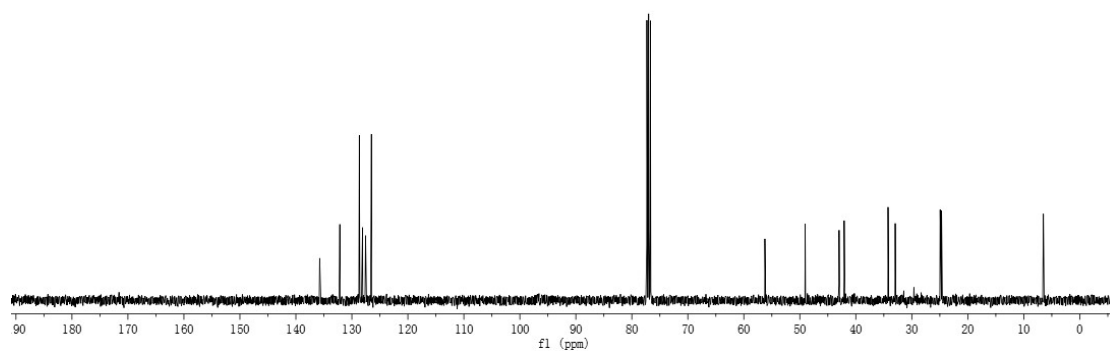

(E)-cyclopentyl(4-phenyl-1-(propylsulfonyl)but-3-en-2-yl)sulfane (4zc)

7.403  
7.385  
7.353  
7.335  
7.316  
7.286  
7.267  
6.579  
6.539  
6.081  
6.057  
6.042  
6.018  
4.037  
4.015  
3.291  
3.286  
3.272  
3.083  
3.065  
3.048  
3.037  
3.028  
3.018  
2.998  
2.016  
1.977  
1.883  
1.865  
1.854  
1.846  
1.836  
1.826  
1.746  
1.732  
1.652  
1.636  
1.619  
1.605  
1.579  
1.561  
1.028  
1.009  
0.991

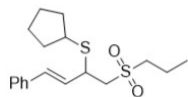

NMR (400 MHz, CDCl<sub>3</sub>)

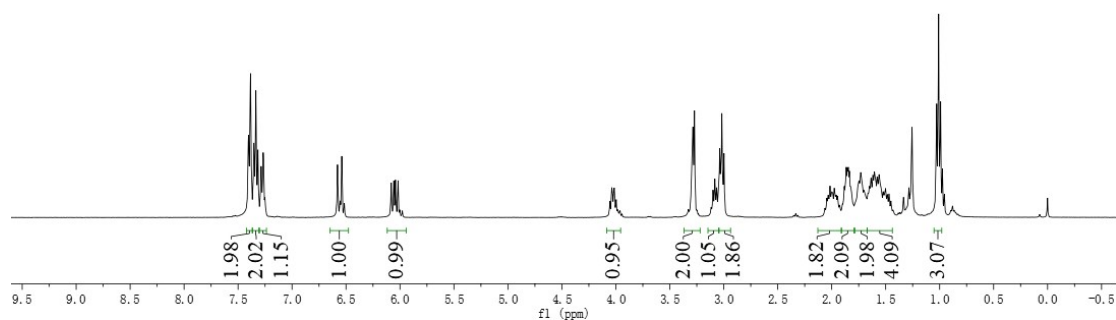

135.777  
132.148  
128.671  
128.092  
127.659  
126.475  
77.317  
77.000  
76.682  
56.988  
56.384  
43.006  
42.077  
34.246  
32.988  
24.935  
24.686  
15.803  
13.062

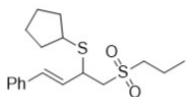

<sup>13</sup>C{<sup>1</sup>H} NMR (100 MHz, CDCl<sub>3</sub>)

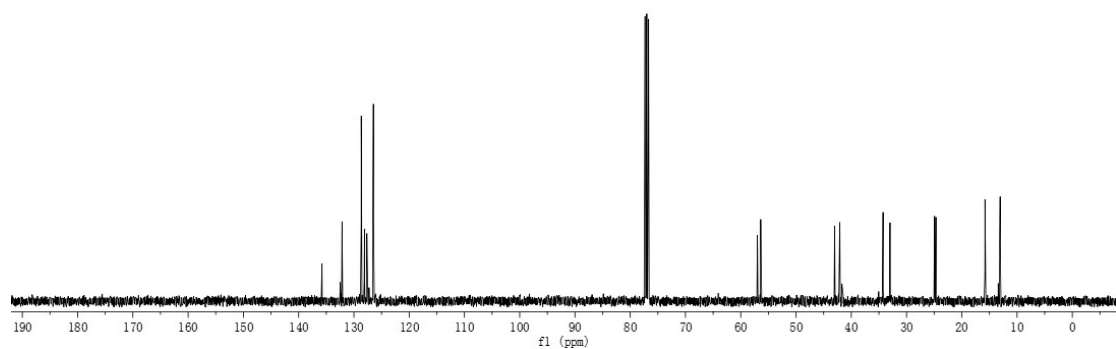

(E)-(1-(butylsulfonyl)-4-phenylbut-3-en-2-yl)(cyclopentyl)sulfane (4zd)

7.401  
7.382  
7.351  
7.333  
7.314  
7.285  
7.266  
7.263  
6.578  
6.539  
6.079  
6.055  
6.040  
6.016  
3.292  
3.287  
3.273  
3.273  
3.082  
3.064  
3.057  
3.037  
3.016  
1.815  
1.796  
1.781  
1.762  
1.745  
1.730  
1.635  
1.619  
1.604  
1.592  
1.578  
1.561  
1.552  
1.427  
1.419  
1.401  
1.382  
1.373  
1.364  
0.902  
0.884  
0.865

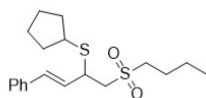

NMR (400 MHz, CDCl<sub>3</sub>)

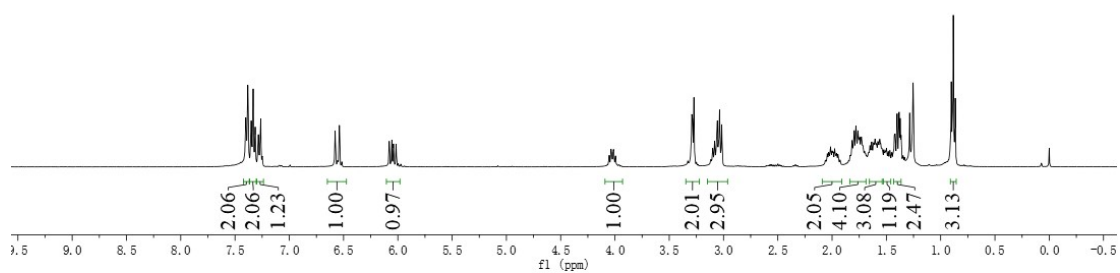

135.769  
132.176  
128.673  
128.113  
127.666  
126.485

77.317  
77.000  
76.682

56.954  
54.473

43.022  
42.131  
34.257  
32.997  
24.947  
24.694  
23.877  
21.605  
13.409

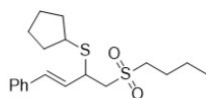

<sup>13</sup>C{<sup>1</sup>H} NMR (100 MHz, CDCl<sub>3</sub>)

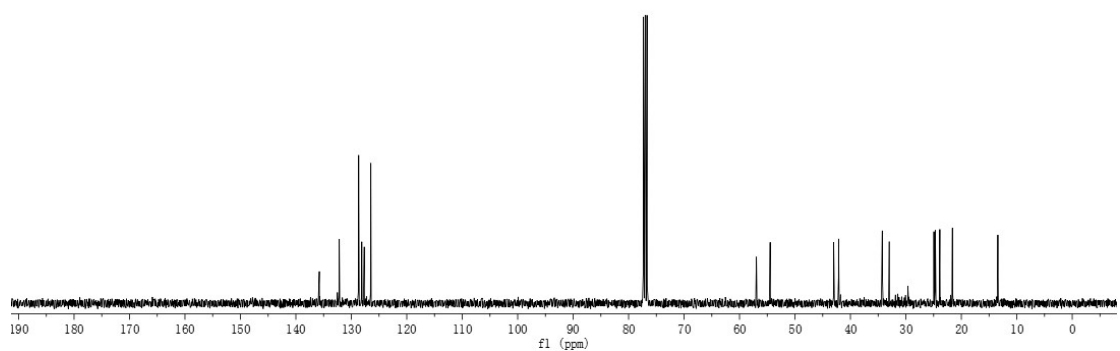

(*E*)-cyclopentyl(1-(isopropylsulfonyl)-4-phenylbut-3-en-2-yl)sulfane (**4ze**)

7.404  
7.386  
7.346  
7.328  
7.309  
7.277  
7.261  
6.576  
6.537  
6.108  
6.084  
6.069  
6.045  
4.060  
4.046  
3.293  
3.273  
3.261  
3.239  
3.222  
3.204  
3.101  
3.084  
3.066  
2.017  
1.975  
1.756  
1.744  
1.728  
1.714  
1.652  
1.636  
1.620  
1.604  
1.589  
1.574  
1.558  
1.549  
1.538  
1.520  
1.498  
1.376  
1.359  
-0.000

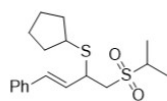

NMR (400 MHz, CDCl<sub>3</sub>)

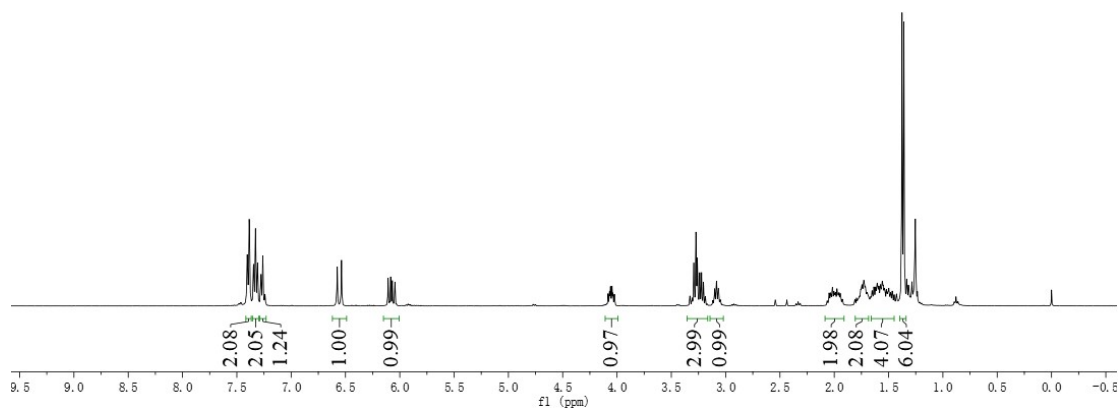

135.917  
131.947  
128.627  
127.983  
127.736  
126.534

77.318  
77.000  
76.682

54.118  
53.726  
42.977  
41.743  
34.264  
32.974  
24.954  
24.710  
15.174  
14.955

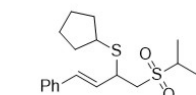

<sup>13</sup>C{<sup>1</sup>H} NMR (100 MHz, CDCl<sub>3</sub>)

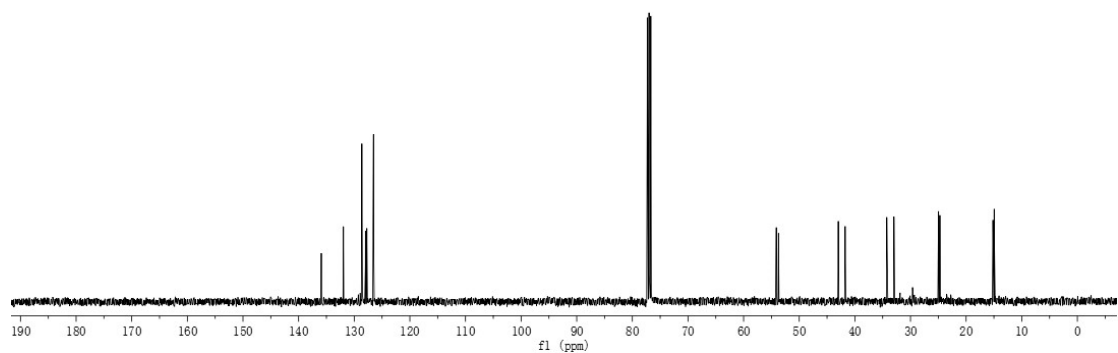

(E)-cyclopentyl(1-(cyclopropylsulfonyl)-4-phenylbut-3-en-2-yl)sulfane (4zf)

7.405  
7.386  
7.347  
7.329  
7.310  
7.278  
7.261  
6.575  
6.536  
6.130  
6.106  
6.091  
6.067  
4.082  
4.059  
3.377  
3.359  
3.087  
2.465  
2.021  
1.980  
1.749  
1.732  
1.719  
1.640  
1.625  
1.608  
1.594  
1.577  
1.561  
1.542  
1.523  
1.504  
1.284  
1.278  
1.271  
1.255  
1.228  
1.221  
1.006  
1.002  
0.995  
0.986  
0.982

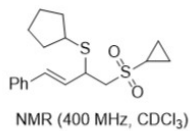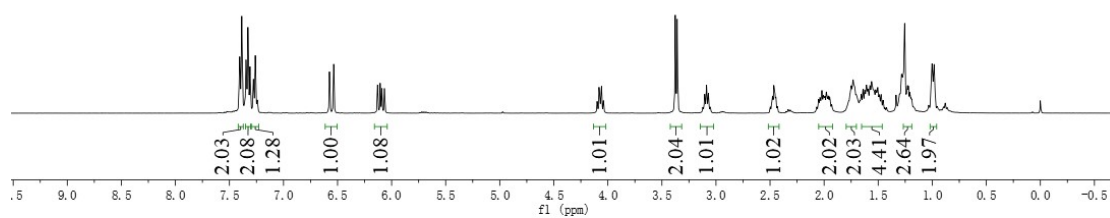

135.895  
131.930  
128.669  
128.019  
127.907  
126.476

77.318  
77.000  
76.683

-58.377

42.892  
42.182  
34.269  
32.996  
31.191  
24.961  
24.720

5.442  
5.232

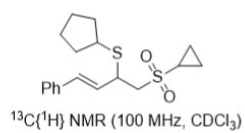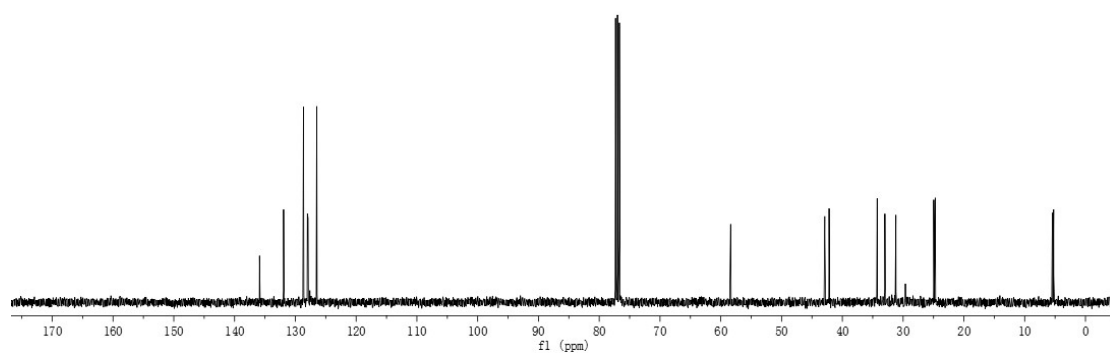

(E)-cyclohexyl(4-phenyl-1-tosylbut-3-en-2-yl)sulfane (4zg)

7.711  
7.691  
7.291  
7.273  
7.256  
7.237  
7.220  
7.184  
7.164  
7.145  
6.298  
6.259  
5.652  
5.628  
5.613  
5.589  
3.999  
3.980  
3.958  
3.940  
3.449  
3.431  
2.623  
2.613  
2.597  
2.589  
2.572  
2.563  
2.274  
1.964  
1.931  
1.796  
1.764  
1.735  
1.674  
1.664  
1.559  
1.525  
1.320  
1.285  
1.254  
1.230  
1.213  
-0.000

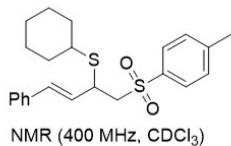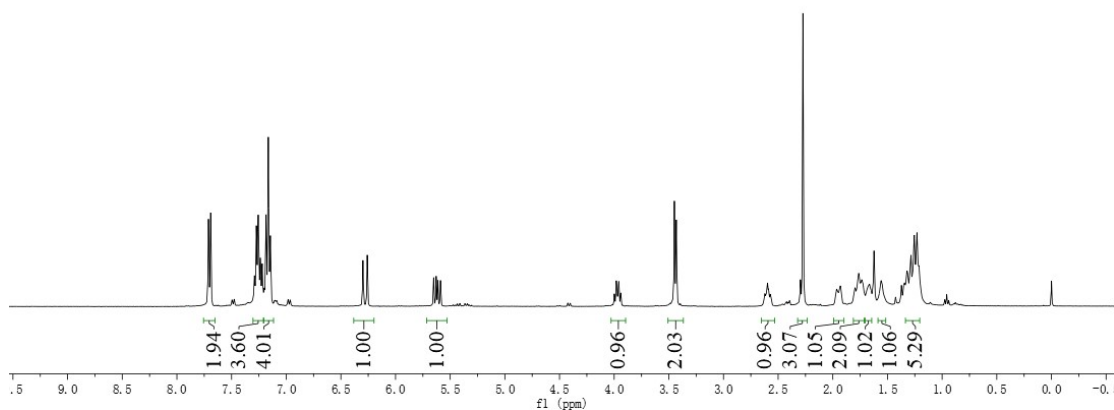

144.719  
136.509  
136.031  
131.795  
129.700  
128.387  
128.324  
127.763  
127.414  
126.414  
77.318  
77.000  
76.683  
-60.366  
42.672  
40.457  
33.595  
33.008  
25.935  
25.637  
25.605  
21.442

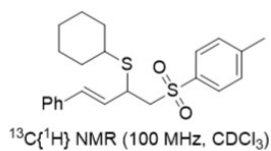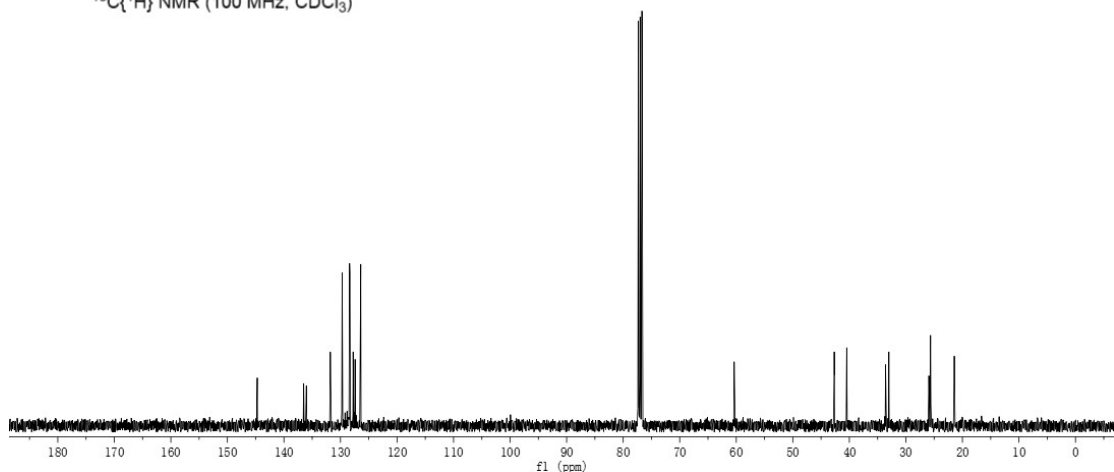

(E)-phenethyl(4-phenyl-1-tosylbut-3-en-2-yl)sulfane (4zh)

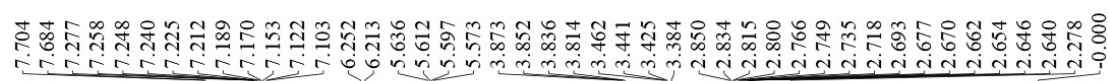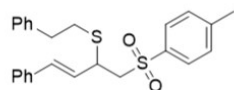

NMR (400 MHz, CDCl<sub>3</sub>)

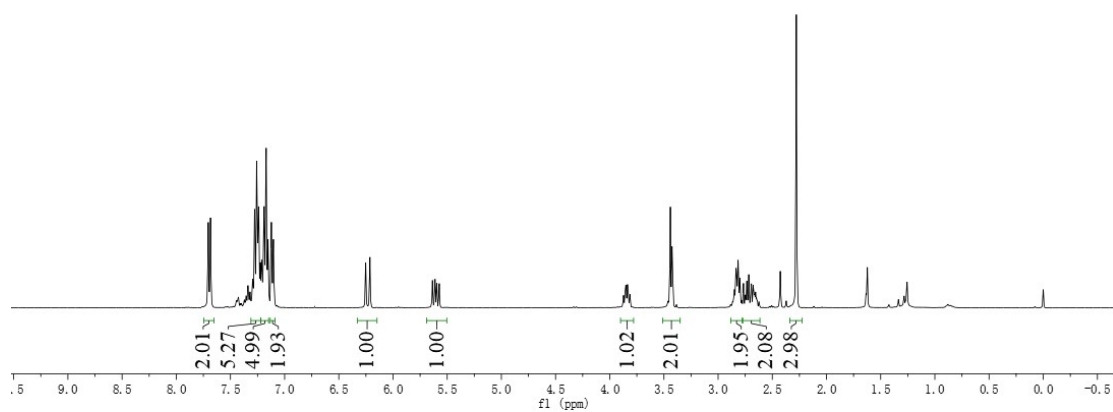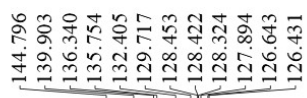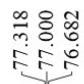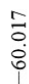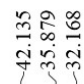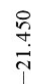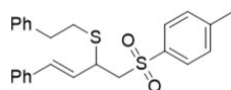

<sup>13</sup>C{<sup>1</sup>H} NMR (100 MHz, CDCl<sub>3</sub>)

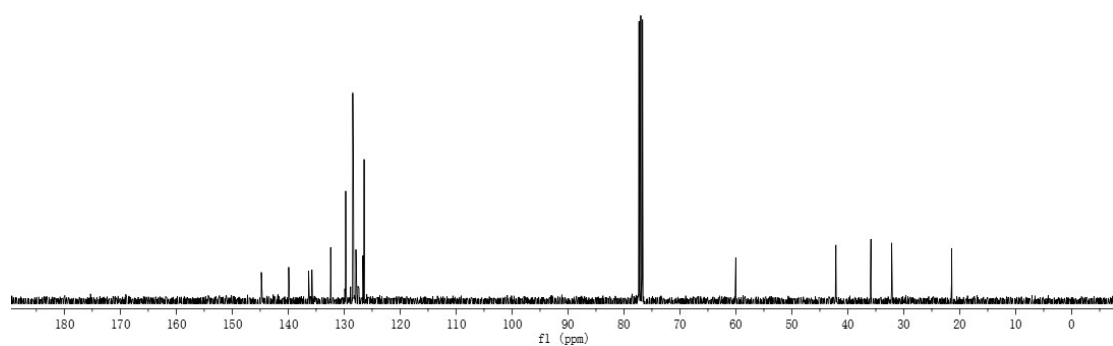

(E)-(4-phenyl-1-tosylbut-3-en-2-yl)(propyl)sulfane (**4zi**)

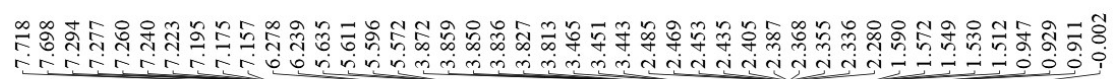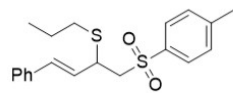

NMR (400 MHz, CDCl<sub>3</sub>)

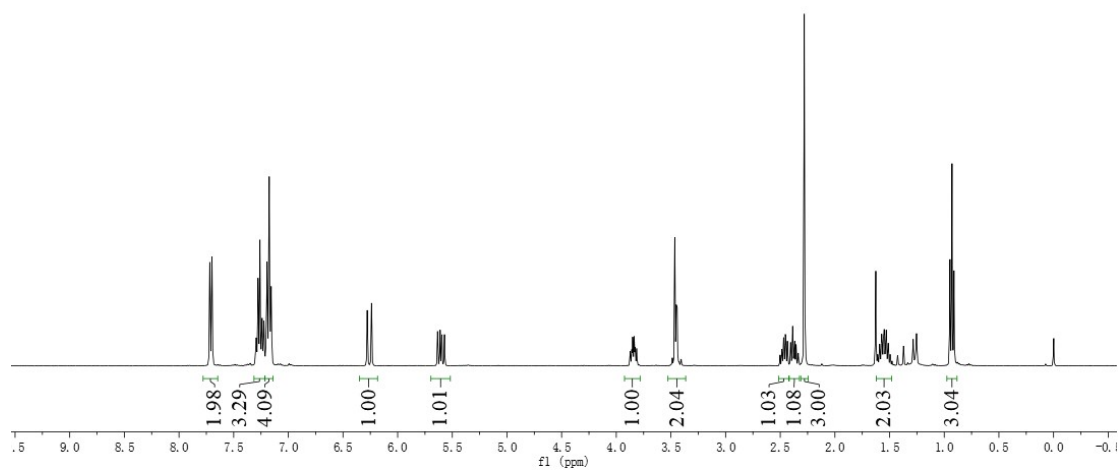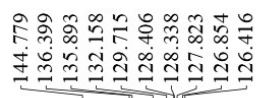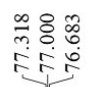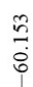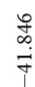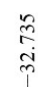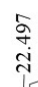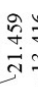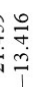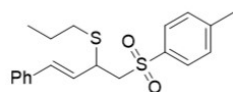

<sup>13</sup>C{<sup>1</sup>H} NMR (100 MHz, CDCl<sub>3</sub>)

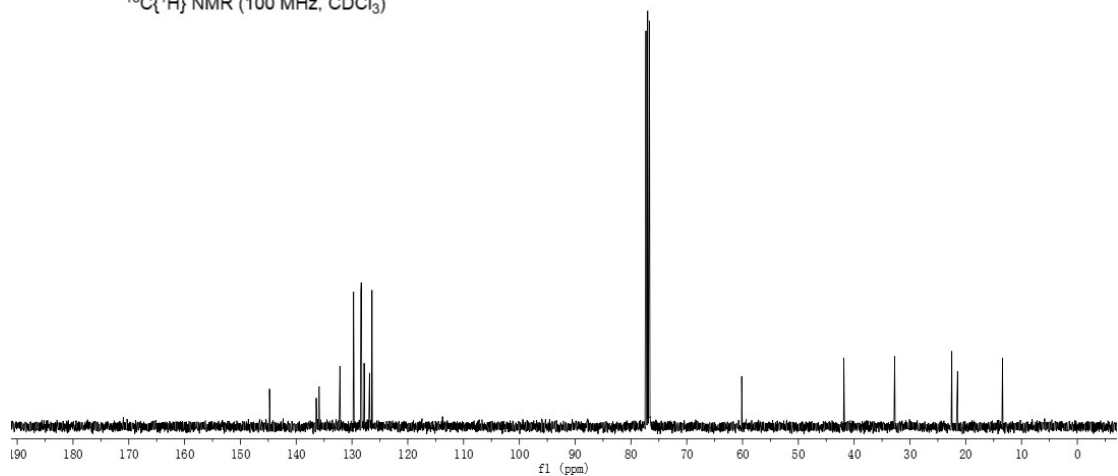

(E)-butyl(4-phenyl-1-tosylbut-3-en-2-yl)sulfane (4zj)

7.722 7.702 7.294 7.276 7.260 7.240 7.223 7.198 7.177 7.157 6.286 6.246 5.640 5.616 5.601 5.577 2.515 2.497 2.483 2.465 2.448 2.434 2.414 2.396 2.383 2.364 2.286 1.514 1.498 1.373 1.339 0.887 0.869 0.852 0.000

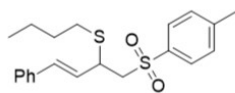

NMR (400 MHz, CDCl<sub>3</sub>)

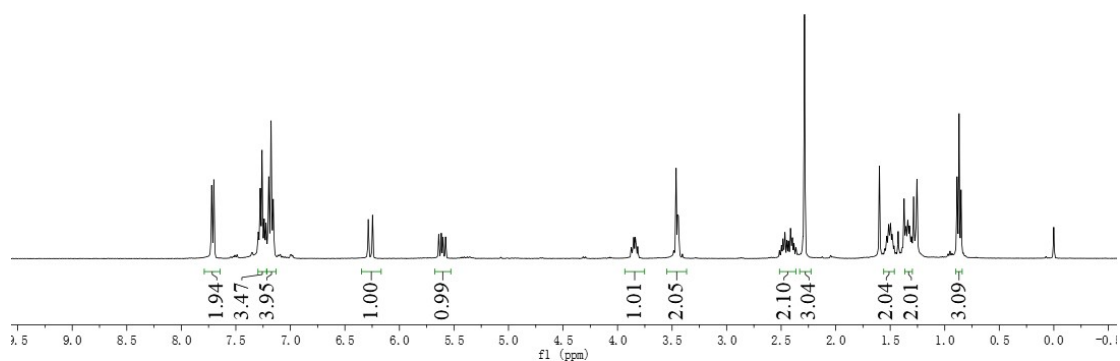

144.779 136.476 135.940 132.194 129.730 128.420 128.363 127.829 126.904 126.434 77.318 77.000 76.683 60.201 41.898 31.242 30.439 21.918 21.463 13.603

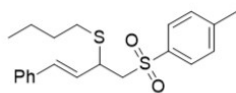

<sup>13</sup>C{<sup>1</sup>H} NMR (100 MHz, CDCl<sub>3</sub>)

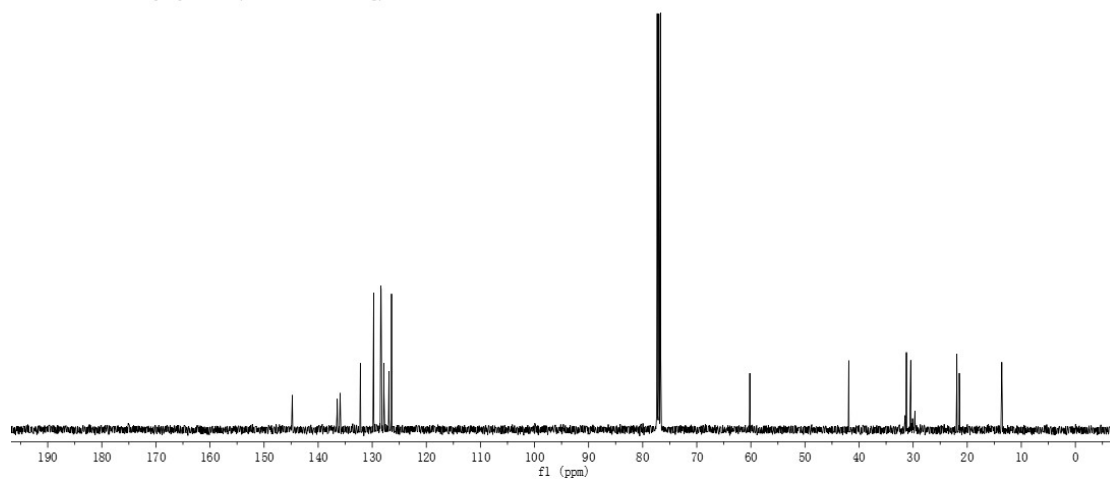

(E)-octyl(4-phenyl-1-tosylbut-3-en-2-yl)sulfane (4zk)

7.719  
7.698  
7.272  
7.254  
7.235  
7.218  
7.190  
7.170  
7.152  
6.276  
6.237  
5.632  
5.609  
5.593  
5.570  
2.507  
2.487  
2.475  
2.459  
2.455  
2.439  
2.418  
2.400  
2.386  
2.380  
2.368  
2.348  
2.275  
2.275  
1.557  
1.538  
1.521  
1.504  
1.485  
1.467  
1.322  
1.306  
1.285  
1.272  
1.254  
1.227  
0.881  
0.865  
0.847  
-0.000

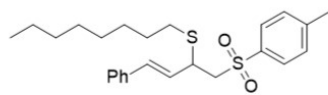

NMR (400 MHz, CDCl<sub>3</sub>)

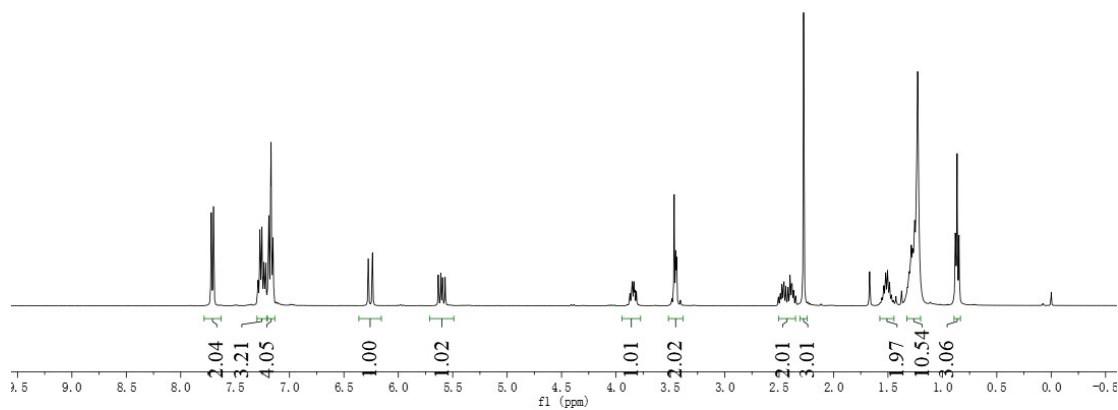

144.737  
136.373  
135.863  
132.124  
129.683  
128.367  
128.312  
127.782  
126.813  
126.381  
77.317  
77.000  
76.682  
60.096  
41.874  
31.697  
30.700  
29.127  
29.061  
29.048  
28.767  
22.553  
21.426  
14.043

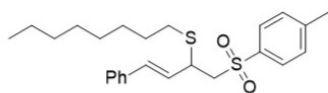

<sup>13</sup>C{<sup>1</sup>H} NMR (100 MHz, CDCl<sub>3</sub>)

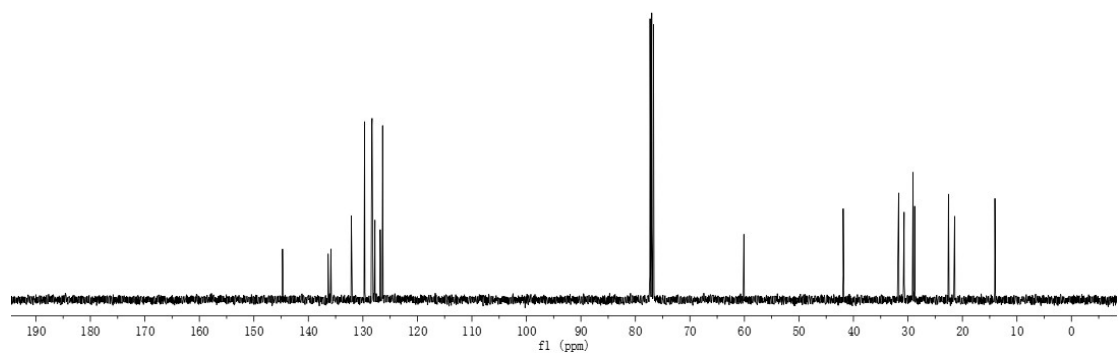

(E)-2-((4-phenyl-1-tosylbut-3-en-2-yl)thio)benzo[d]thiazole (**4zI**)

7.844, 7.784, 7.764, 7.744, 7.724, 7.315, 7.271, 7.252, 7.241, 7.216, 7.195, 6.662, 6.623, 6.117, 6.095, 6.055, 4.958, 4.942, 4.934, 4.918, 4.100, 4.073, 4.064, 3.859, 3.833, 3.823, 3.797, -2.327, -0.082, -0.000

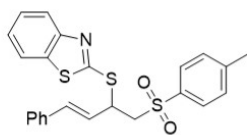

NMR (400 MHz, CDCl<sub>3</sub>)

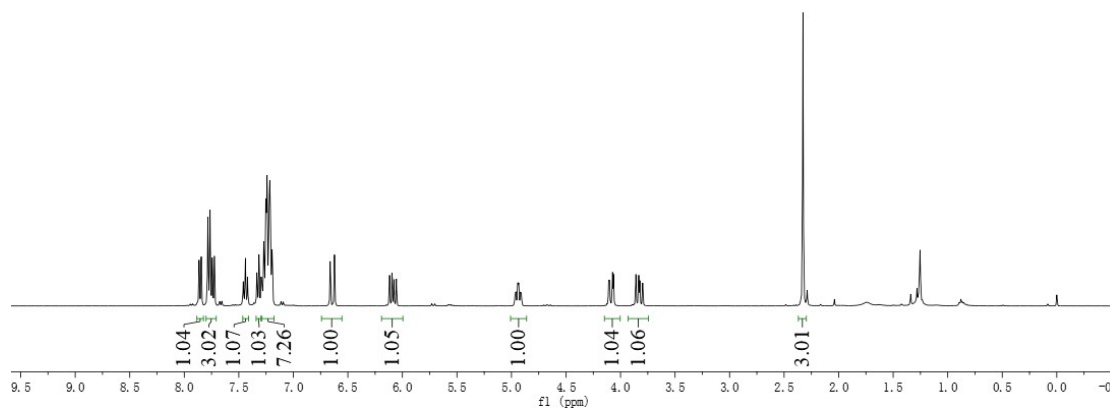

162.976, 152.935, 144.860, 136.257, 135.597, 135.391, 135.008, 129.759, 128.422, 128.371, 128.237, 126.652, 126.126, 124.722, 124.092, 121.863, 121.019, 77.318, 77.000, 76.682, -59.954, -45.139, -21.506

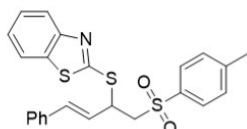

<sup>13</sup>C{<sup>1</sup>H} NMR (100 MHz, CDCl<sub>3</sub>)

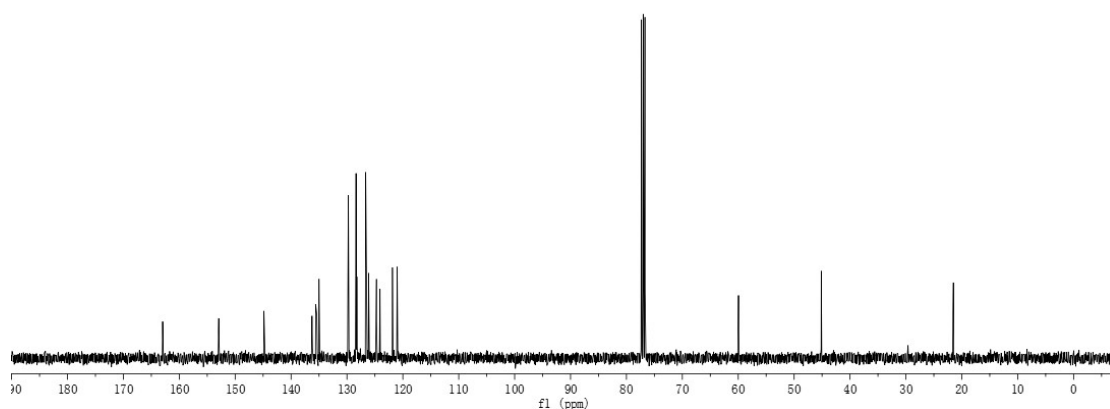

(E)-(4-(tert-butyl)phenyl)(4-phenyl-1-tosylbut-3-en-2-yl)sulfane (4zm)

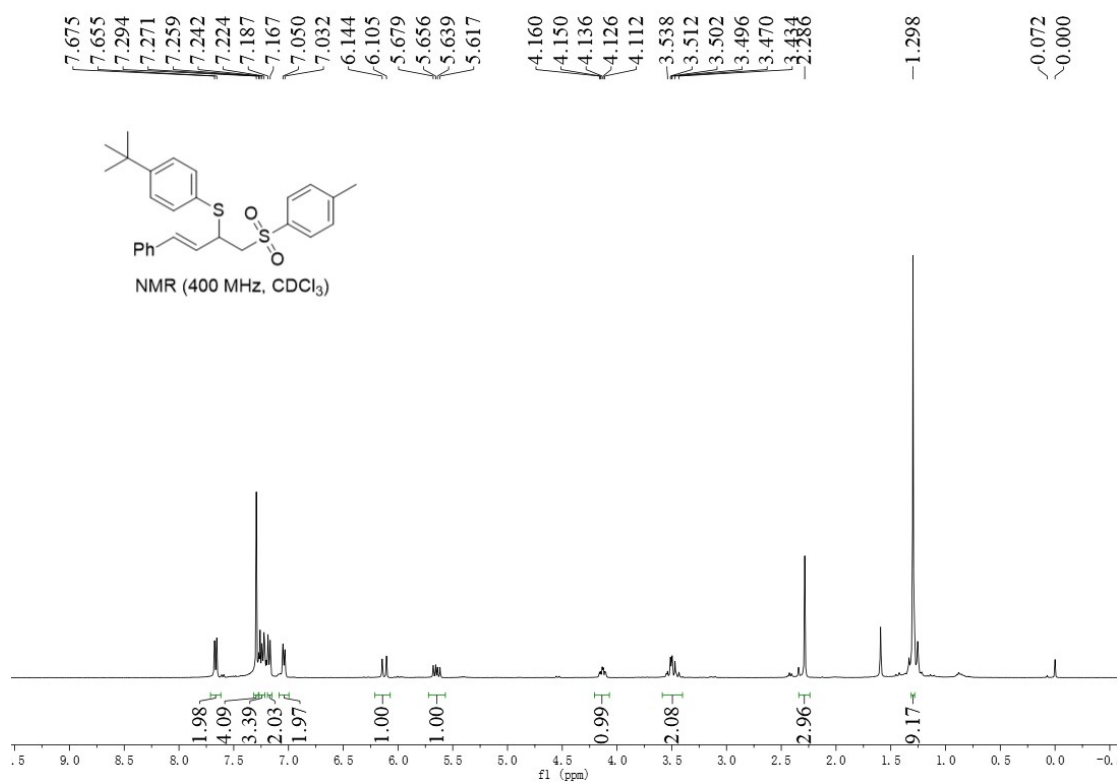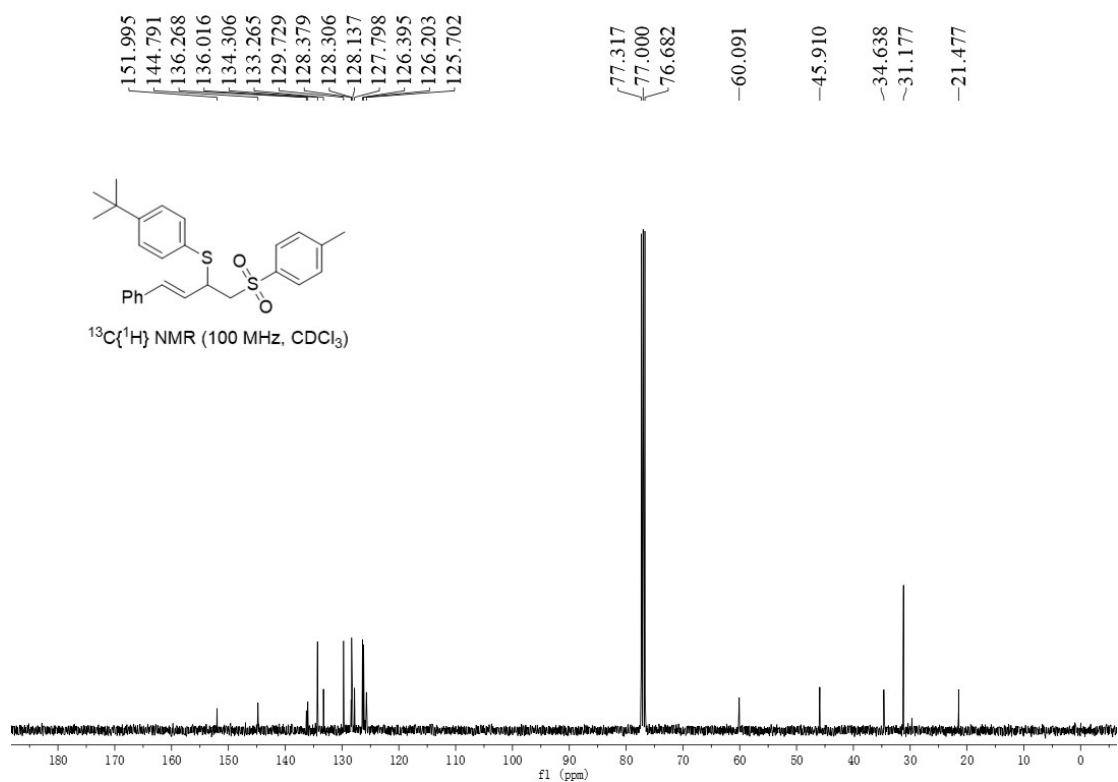

(E)-(4-phenyl-1-tosylbut-3-en-2-yl)(p-tolyl)sulfane (4zn)

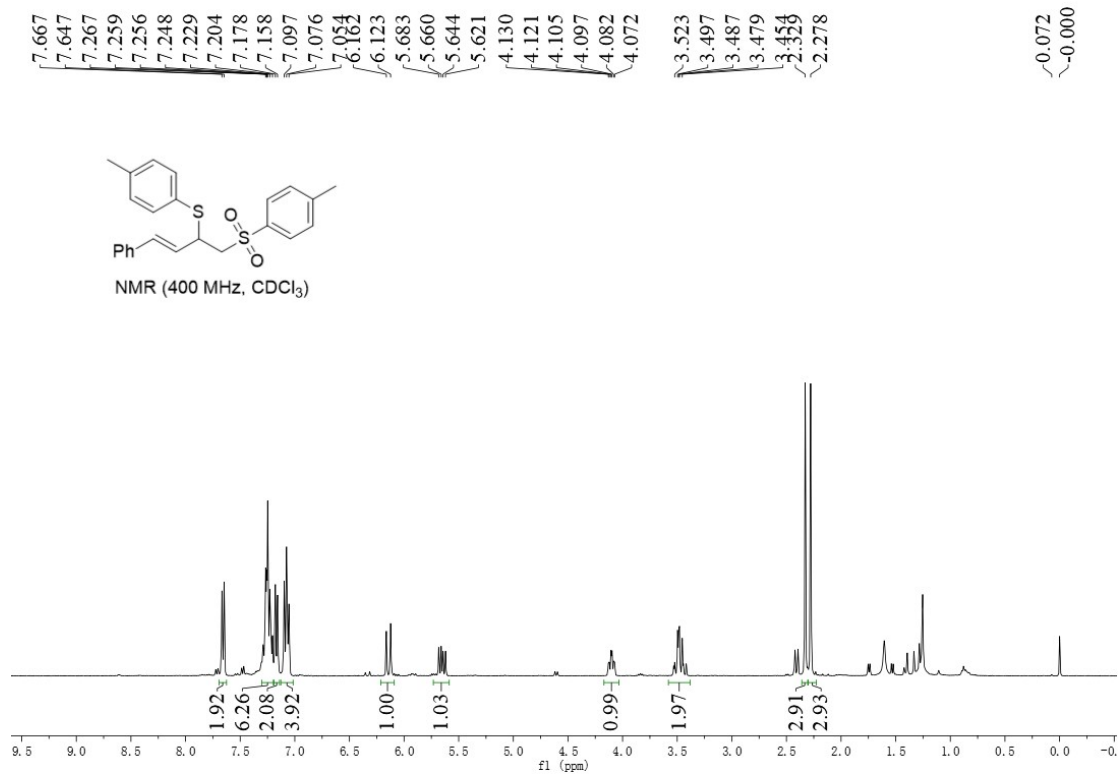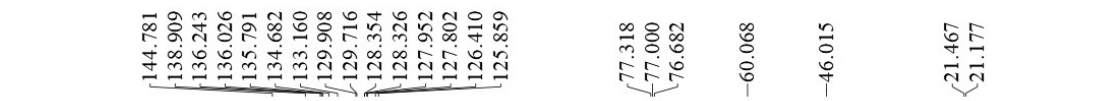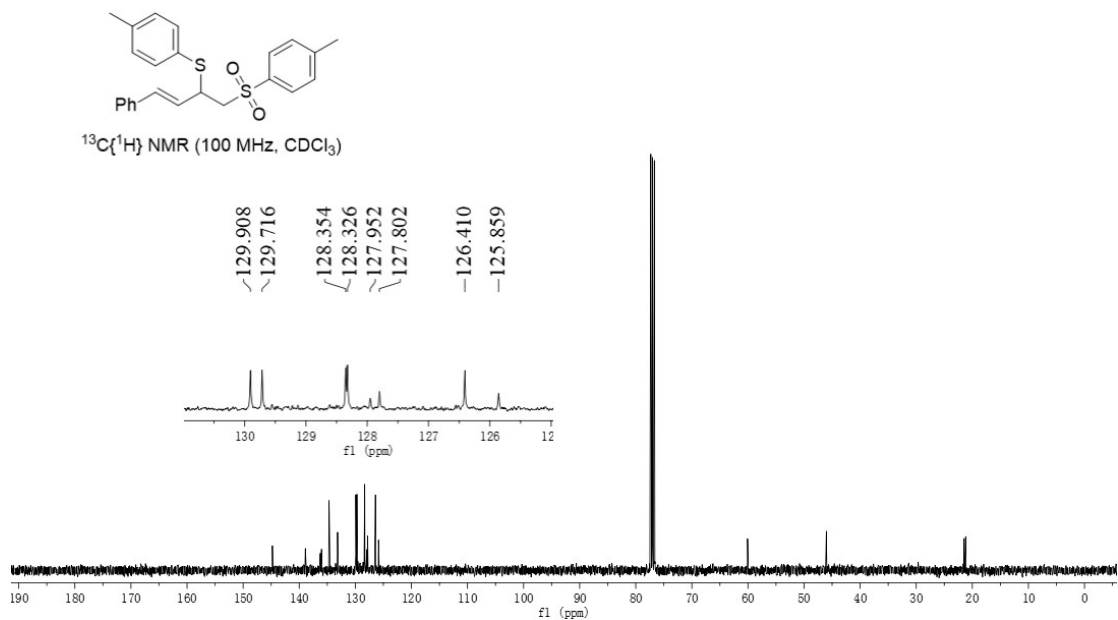

(E)-(2,4-dichlorophenyl)(4-phenyl-1-tosylbut-3-en-2-yl)sulfane (4zo)

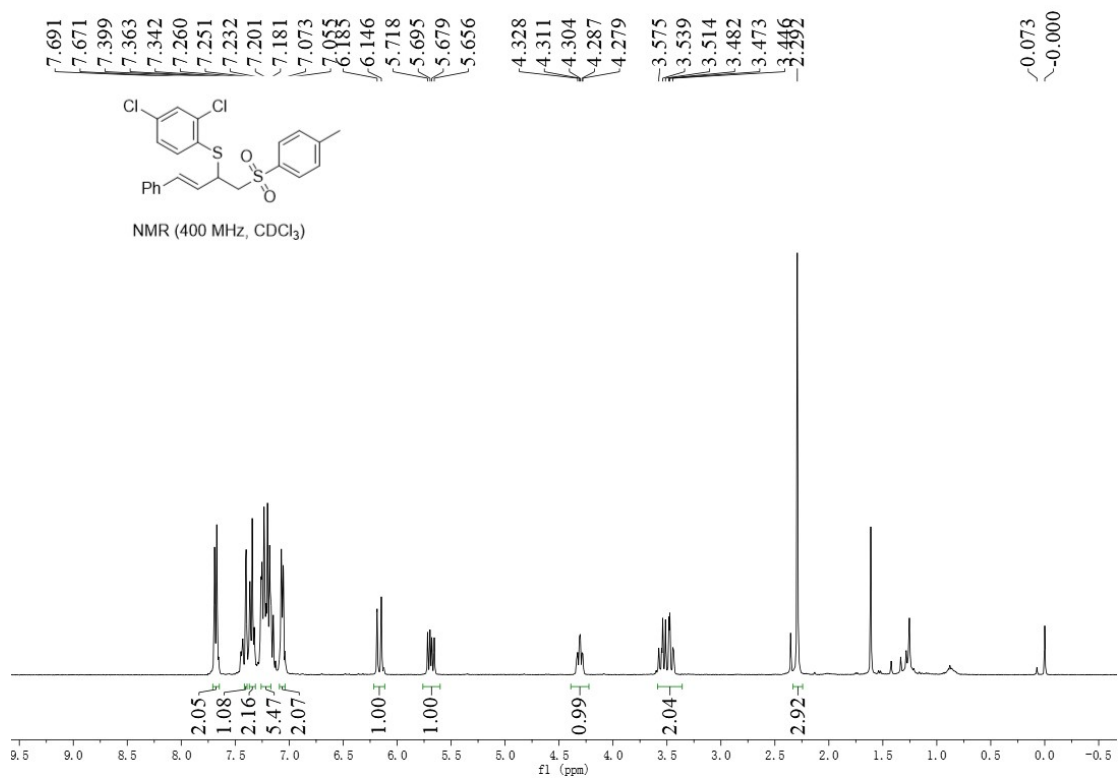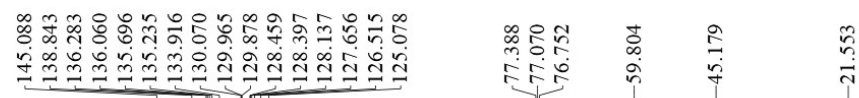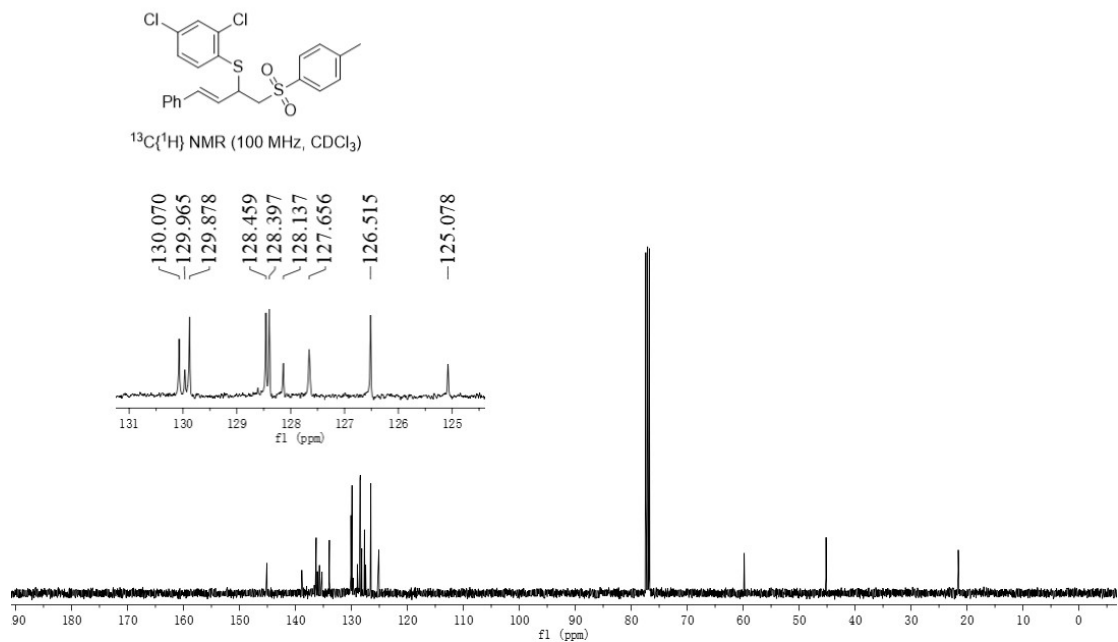

(2-tosylethene-1,1-diyl)dibenzene (5)

7.480  
7.459  
7.369  
7.354  
7.337  
7.309  
7.292  
7.273  
7.206  
7.188  
7.151  
7.131  
7.103  
7.085  
6.996

-2.366

-0.084  
-0.000

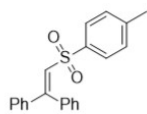

NMR (400 MHz, CDCl<sub>3</sub>)

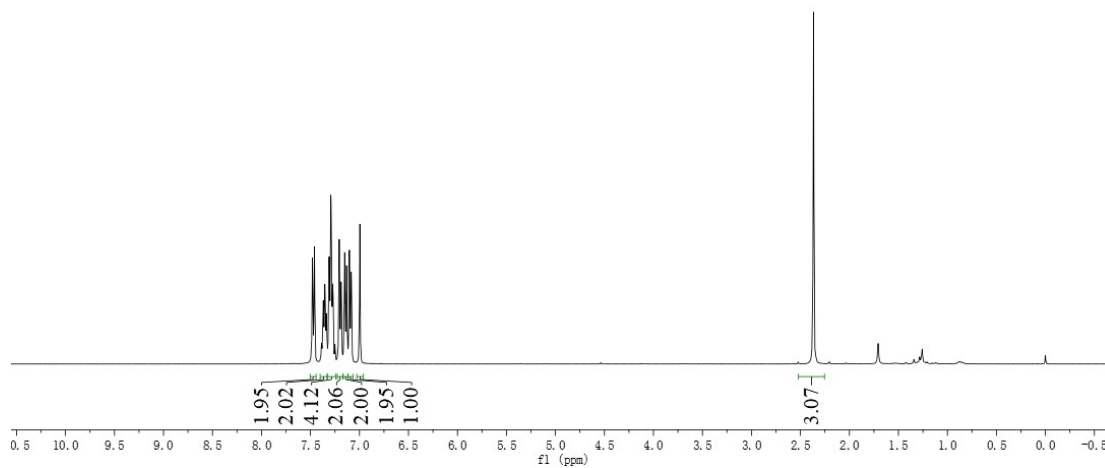

154.624  
143.685  
139.081  
138.435  
135.454  
130.154  
129.659  
129.243  
128.815  
128.750  
128.477  
128.104  
127.707  
127.573

77.318  
77.000  
76.682

-21.476

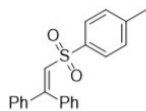

<sup>13</sup>C{<sup>1</sup>H} NMR (100 MHz, CDCl<sub>3</sub>)

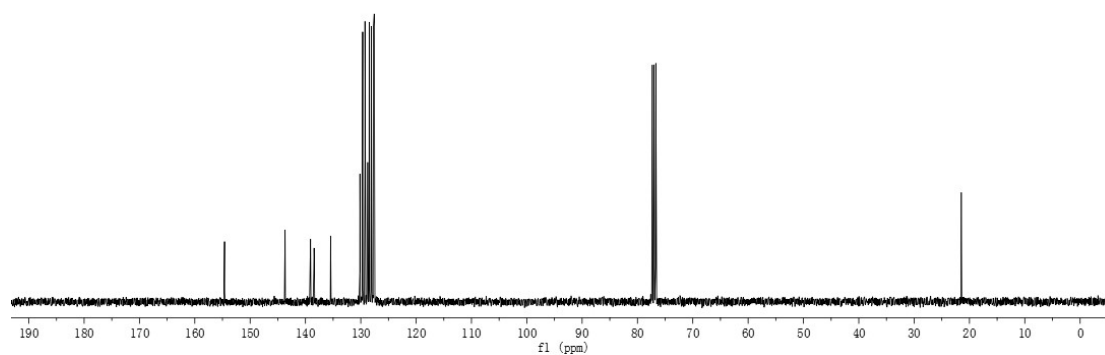

4-(tosylmethyl)-1,2-dihydronaphthalene (7)

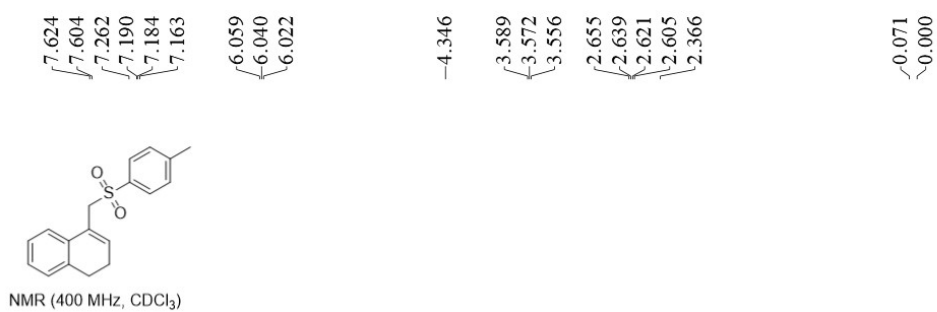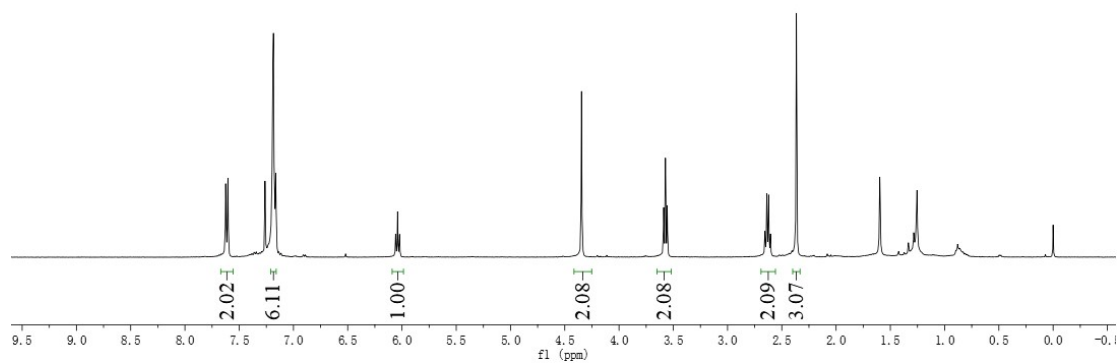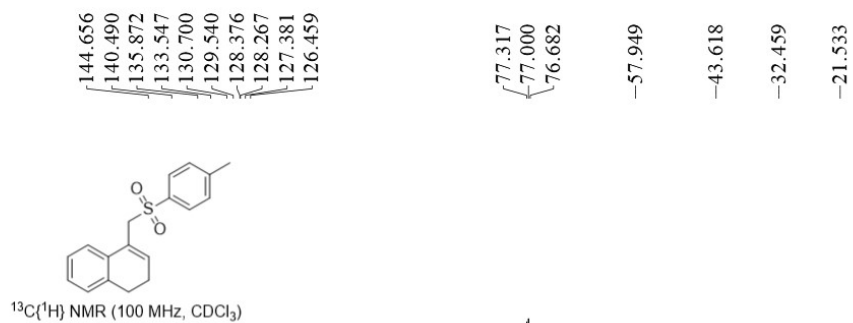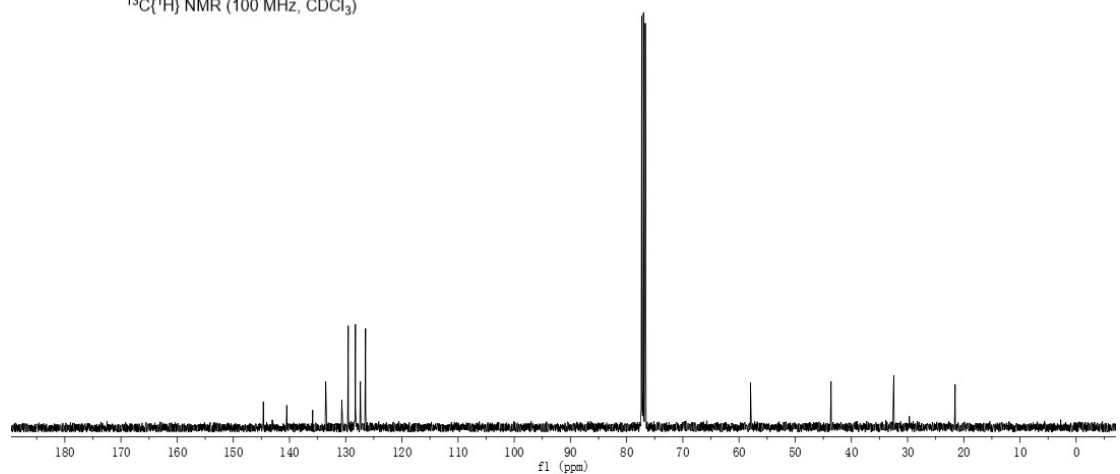

1-methyl-4-((2-phenylpent-2-en-1-yl)sulfonyl)benzene (**8**)

7.615  
7.595  
7.262  
7.212  
7.193  
7.175  
7.152  
5.966  
5.948  
5.930  
-4.339  
2.362  
2.116  
2.097  
2.079  
2.060  
2.041  
0.983  
0.964  
0.946  
-0.071  
-0.000

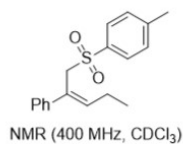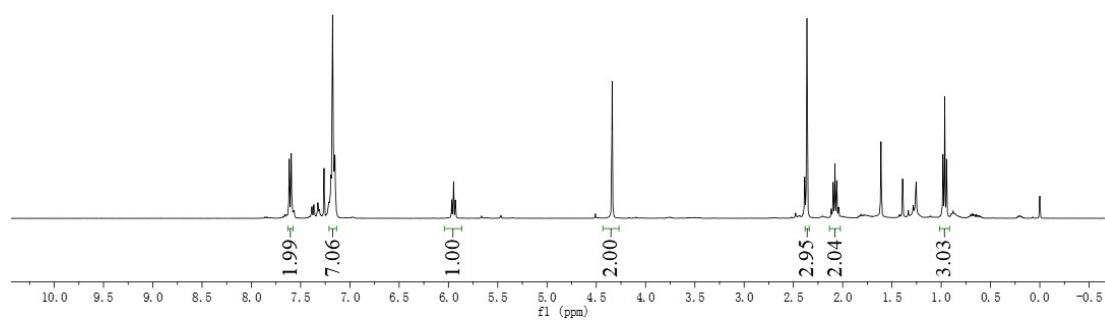

144.375  
140.857  
140.213  
135.961  
129.383  
128.465  
128.179  
127.307  
126.936  
126.371  
77.318  
77.000  
76.682  
-57.656  
22.679  
21.512  
-13.560

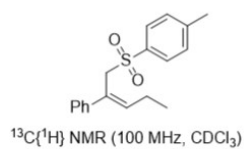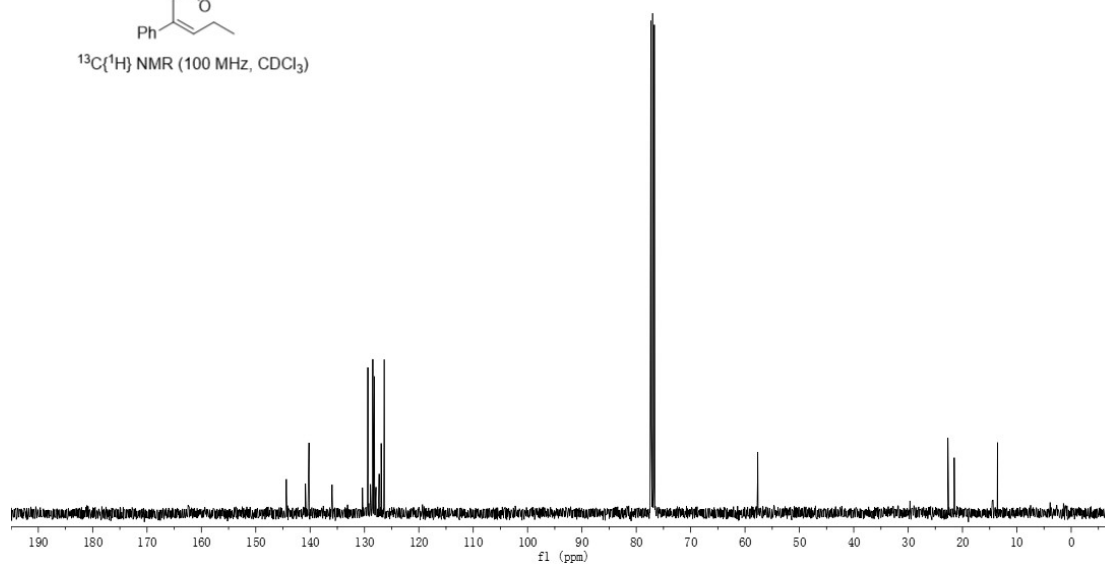

Supplement: d6ob00721j1.pdf [file d6ob00721j1.pdf]
